# Supplementary material for: Chloroplast Genomes of Two Species of Cypripedium: Expanded Genome Size and Proliferation of AT-Biased Repeat Sequences
Source: Front Plant Sci. 2021 Feb 9;12:609729. doi: 10.3389/fpls.2021.609729 (PMC7900419; doi:10.3389/fpls.2021.609729)
Supplement: Supplementary Table 1 — List of land plants with sequenced plastomes available from GenBank. The species with expanded chloroplast genomes (>170 kb) are marked in red. [file Table_1.XLSX]

## Sheet: Table S1
Table S1. List of land plants with sequenced plastomes available from GenBank. The species with expanded chloroplast genomes (>170 kb) are marked in red.
#Organism Name	Organism Groups	Strain	BioSample	BioProject	Size(Mb)	GC%	Type	Replicons	CDS	Release Date
Pilostyles aethiopica	Eukaryota;Plants;Land Plants			PRJNA311877	0.011348	24.2333	plastid	NC_029235.1/KT981955.1	3	2016-02-12T00:00:00Z
Pilostyles hamiltonii	Eukaryota;Plants;Land Plants			PRJNA311862	0.015167	22.6676	plastid	NC_029236.1/KT981956.1	4	2016-02-12T00:00:00Z
Asarum minus	Eukaryota;Plants;Land Plants			PRJNA453327	0.015553	32.2832	chloroplast	NC_037503.1/MG554424.1	7	2018-04-24T00:00:00Z
Epipogium roseum	Eukaryota;Plants;Land Plants			PRJNA274919	0.019047	30.619	plastid	NC_026448.1/KJ772291.1	18	2015-04-22T00:00:00Z
Cytinus hypocistis	Eukaryota;Plants;Land Plants			PRJNA344275	0.0194	29.8866	chloroplast	NC_031150.1/KT335971.1	15	2016-09-23T00:00:00Z
Sciaphila densiflora	Eukaryota;Plants;Land Plants			PRJNA291238	0.021485	39.9209	chloroplast	NC_027659.1/KR902497.1	18	2015-07-28T00:00:00Z
Hydnora visseri	Eukaryota;Plants;Land Plants		SAMN04168085	PRJNA313946	0.027233	23.4128	plastid	NC_029358.1/KT970098.1	17	2016-03-01T00:00:00Z
Epipogium aphyllum	Eukaryota;Plants;Land Plants			PRJNA274921	0.03065	32.8385	plastid	NC_026449.1/KJ772292.1	22	2015-02-13T00:00:00Z
Monotropsis odorata	Eukaryota;Plants;Land Plants			PRJNA399906	0.032752	31.2042	plastid	NC_035583.1/MF120267.1	20	2017-08-24T00:00:00Z
Gastrodia elata	Eukaryota;Plants;Land Plants			PRJNA453229	0.035304	26.7703	chloroplast	NC_037409.1/MF163256.1	20	2018-04-24T00:00:00Z
Monotropa hypopitys	Eukaryota;Plants;Land Plants			PRJNA316227	0.035336	34.3134	chloroplast	NC_029704.1/KU640957.1	24	2016-03-28T00:00:00Z
Hemitomes congestum	Eukaryota;Plants;Land Plants			PRJNA400024	0.035569	33.7822	plastid	NC_035581.1/MF120263.1	23	2017-08-24T00:00:00Z
Pityopus californicus	Eukaryota;Plants;Land Plants			PRJNA399905	0.035926	34.3734	plastid	NC_035584.1/MF120268.1	23	2017-08-24T00:00:00Z
Allotropa virgata	Eukaryota;Plants;Land Plants			PRJNA400025	0.035983	33.0851	plastid	NC_035580.1/MF120261.1	23	2017-08-24T00:00:00Z
Epirixanthes elongata	Eukaryota;Plants;Land Plants			PRJNA609503	0.036275	43.9639	chloroplast	NC_046013.1/MG783393.1	19	2020-03-07T00:00:00Z
Burmannia oblonga	Eukaryota;Plants;Land Plants			PRJNA430605	0.039386	33.2225	chloroplast	NC_036664.1/KT734622.1	22	2018-01-18T00:00:00Z
Monotropa uniflora	Eukaryota;Plants;Land Plants			PRJNA400006	0.043351	28.4653	plastid	NC_035582.1/MF120265.1	22	2017-08-24T00:00:00Z
Conopholis americana	Eukaryota;Plants;Land Plants			PRJNA232228	0.045673	33.9369	plastid	NC_023131.1/HG514459.1	21	2013-12-16T00:00:00Z
Rhizanthella gardneri	Eukaryota;Plants;Land Plants			PRJNA61687	0.05919	34.2102	plastid	NC_014874.1/GQ413967.1	23	2011-01-07T00:00:00Z
Cuscuta erosa	Eukaryota;Plants;Land Plants			PRJNA550925	0.060959	36.8871	plastid	NC_042948.1/MK881073.1	33	2019-06-25T00:00:00Z
Phelipanche ramosa	Eukaryota;Plants;Land Plants			PRJNA238110	0.062304	32.0557	chloroplast	NC_023465.1/HG803180.1	27	2014-01-23T00:00:00Z
Cuscuta boldinghii	Eukaryota;Plants;Land Plants			PRJNA550926	0.062375	36.8128	plastid	NC_042949.1/MK881074.1	31	2019-06-25T00:00:00Z
Phelipanche purpurea	Eukaryota;Plants;Land Plants			PRJNA232203	0.062891	31.0839	chloroplast	NC_023132.1/HG515536.1	30	2013-12-16T00:00:00Z
Cuscuta strobilacea	Eukaryota;Plants;Land Plants			PRJNA553899	0.063787	37.0938	plastid	NC_043775.1/MK867795.1	33	2019-07-22T00:00:00Z
Orobanche gracilis	Eukaryota;Plants;Land Plants			PRJNA238113	0.065533	34.5551	chloroplast	NC_023464.1/HG803179.1	24	2014-01-23T00:00:00Z
Phelypaea coccinea	Eukaryota;Plants;Land Plants			PRJNA555943	0.066616	31.7401	chloroplast	NC_043877.1/MK922354.1	26	2019-07-22T00:00:00Z
Epifagus virginiana	Eukaryota;Plants;Land Plants			PRJNA12268	0.070028	35.9985	chloroplast	NC_001568.1/M81884.1	25	1993-08-03T00:00:00Z
Boulardia latisquama	Eukaryota;Plants;Land Plants			PRJNA267434	0.080361	35.7549	plastid	NC_025641.1/HG514460.1	29	2014-10-26T00:00:00Z
Pholisma arenarium	Eukaryota;Plants;Land Plants			PRJNA504125	0.081198	38.1192	chloroplast	NC_039719.1/MH237601.1	31	2018-11-09T00:00:00Z
Cuscuta carnosa	Eukaryota;Plants;Land Plants			PRJNA553976	0.081577	37.8452	plastid	NC_043868.1/MK887212.1	58	2019-07-22T00:00:00Z
Orobanche austrohispanica	Eukaryota;Plants;Land Plants			PRJNA348004	0.081994	35.0879	chloroplast	NC_031441.1/KT387721.1	29	2016-10-13T00:00:00Z
Cuscuta bonafortunae	Eukaryota;Plants;Land Plants			PRJNA553874	0.082346	37.3096	plastid	NC_043871.1/MK887215.1	59	2019-07-22T00:00:00Z
Orobanche densiflora	Eukaryota;Plants;Land Plants			PRJNA348003	0.083024	35.5379	chloroplast	NC_031442.1/KT387723.1	32	2016-10-13T00:00:00Z
Neottia acuminata	Eukaryota;Plants;Land Plants			PRJNA336202	0.08319	36.5741	plastid	NC_030709.1/KU551268.1	29	2016-08-03T00:00:00Z
Cuscuta mexicana	Eukaryota;Plants;Land Plants			PRJNA553975	0.083526	37.5452	plastid	NC_043869.1/MK887213.1	57	2019-07-22T00:00:00Z
Lennoa madreporoides	Eukaryota;Plants;Land Plants			PRJNA504173	0.083675	37.0505	chloroplast	NC_039720.1/MH237602.1	34	2018-11-09T00:00:00Z
Cuscuta chapalana	Eukaryota;Plants;Land Plants			PRJNA553900	0.084607	37.5796	plastid	NC_043870.1/MK887214.1	61	2019-07-22T00:00:00Z
Cuscuta australis	Eukaryota;Plants;Land Plants			PRJNA608384	0.085263	37.8206	chloroplast	NC_045885.1/MN866891.1	61	2020-02-24T00:00:00Z
Cuscuta obtusiflora	Eukaryota;Plants;Land Plants			PRJNA27773	0.085286	37.835	chloroplast	NC_009949.1/EU189133.1	61	2007-11-02T00:00:00Z
Parasitaxus usta	Eukaryota;Plants;Land Plants			PRJNA574375	0.085318	37.6673	chloroplast	NC_044894.1/MN016936.1	37	2019-09-26T00:00:00Z
Burmannia championii	Eukaryota;Plants;Land Plants			PRJNA430652	0.085868	35.6244	chloroplast	NC_036663.1/KT734621.1	35	2018-01-18T00:00:00Z
Cuscuta pentagona	Eukaryota;Plants;Land Plants			PRJNA504171	0.08638	37.8699	chloroplast	NC_039759.1/MH121054.1	61	2018-11-09T00:00:00Z
Cuscuta costaricensis	Eukaryota;Plants;Land Plants			PRJNA550927	0.086691	37.1446	plastid	NC_042956.1/MK881072.1	60	2019-06-25T00:00:00Z
Cuscuta gronovii	Eukaryota;Plants;Land Plants			PRJNA20671	0.086744	37.7167	chloroplast	NC_009765.1/AM711639.1	62	2007-08-28T00:00:00Z
Orobanche crenata	Eukaryota;Plants;Land Plants			PRJNA261176	0.087529	35.1861	chloroplast	NC_024845.1/HG515537.1	36	2014-09-02T00:00:00Z
Orobanche pancicii	Eukaryota;Plants;Land Plants			PRJNA348086	0.088525	35.2432	chloroplast	NC_031443.1/KT387724.1	32	2016-10-13T00:00:00Z
Orobanche rapum-genistae	Eukaryota;Plants;Land Plants			PRJNA348002	0.091517	35.495	chloroplast	NC_031444.1/KT387725.1	31	2016-10-13T00:00:00Z
Neottia nidus-avis	Eukaryota;Plants;Land Plants			PRJNA80217	0.09206	34.4004	plastid	NC_016471.1/JF325876.1	31	2011-12-21T00:00:00Z
Cistanche phelypaea	Eukaryota;Plants;Land Plants			PRJNA267342	0.09438	36.5607	plastid	NC_025642.1/HG515538.1	30	2014-10-28T00:00:00Z
Aphyllorchis montana	Eukaryota;Plants;Land Plants			PRJNA336203	0.094559	37.107	plastid	NC_030703.1/KU551262.1	34	2016-08-03T00:00:00Z
Burmannia nepalensis	Eukaryota;Plants;Land Plants			PRJNA430595	0.098706	34.6463	chloroplast	NC_036670.1/KU954767.1	29	2018-01-18T00:00:00Z
Cistanche deserticola	Eukaryota;Plants;Land Plants			PRJNA198667	0.102657	36.7837	chloroplast	NC_021111.1/KC128846.1	31	2013-05-17T00:00:00Z
Petrosavia stellaris	Eukaryota;Plants;Land Plants			PRJNA236298	0.103835	37.4691	plastid	NC_023356.1/KF482381.1	41	2014-01-24T00:00:00Z
Tetraena mongolica	Eukaryota;Plants;Land Plants			PRJNA508188	0.106259	33.584	chloroplast	NC_039985.1/MH325021.1	69	2018-12-03T00:00:00Z
Neottia camtschatea	Eukaryota;Plants;Land Plants			PRJNA336215	0.106385	37.1697	plastid	NC_030707.1/KU551266.1	38	2016-08-03T00:00:00Z
Aphyllon fasciculatum	Eukaryota;Plants;Land Plants			PRJNA504124	0.106796	34.6642	chloroplast	NC_039679.1/MH499248.1	34	2018-11-09T00:00:00Z
Cathaya argyrophylla	Eukaryota;Plants;Land Plants			PRJNA56105	0.107122	38.7829	chloroplast	NC_014589.1/AB547400.1	70	2010-10-20T00:00:00Z
Burmannia cryptopetala	Eukaryota;Plants;Land Plants			PRJNA430651	0.107771	36.5442	chloroplast	NC_036662.1/KT734620.1	38	2018-01-18T00:00:00Z
Aneura mirabilis	Eukaryota;Plants;Land Plants			PRJNA28869	0.108007	40.6233	chloroplast	NC_010359.1/EU043314.1	62	2008-02-28T00:00:00Z
Cololejeunea lanciloba	Eukaryota;Plants;Land Plants			PRJNA553875	0.108674	31.1491	chloroplast	NC_043778.1/MH064505.1	80	2019-07-22T00:00:00Z
Ephedra equisetina	Eukaryota;Plants;Land Plants			PRJNA33793	0.109518	36.636	chloroplast	NC_011954.1/AP010819.1	72	2009-01-29T00:00:00Z
Ephedra sinica	Eukaryota;Plants;Land Plants			PRJNA573372	0.10955	36.6874	chloroplast	NC_044773.1/MH161422.1	73	2019-09-21T00:00:00Z
Ephedra foeminea	Eukaryota;Plants;Land Plants			PRJNA313649	0.109584	36.6513	chloroplast	NC_029347.1/KT934791.1	73	2016-03-01T00:00:00Z
Ephedra intermedia	Eukaryota;Plants;Land Plants			PRJNA573344	0.109667	36.6272	chloroplast	NC_044772.1/MH161421.1	73	2019-09-21T00:00:00Z
Neottia listeroides	Eukaryota;Plants;Land Plants			PRJNA336201	0.110246	37.2322	plastid	NC_030713.1/KU551272.1	35	2016-08-03T00:00:00Z
Selaginella lyallii	Eukaryota;Plants;Land Plants			PRJNA532014	0.110411	50.7486	chloroplast	NC_041556.1/MK156800.1	61	2019-04-10T00:00:00Z
Carnegiea gigantea	Eukaryota;Plants;Land Plants			PRJNA290764	0.113064	36.6783	chloroplast	NC_027618.1/KT164771.1	67	2015-07-23T00:00:00Z
Lophocereus schottii	Eukaryota;Plants;Land Plants			PRJNA534063	0.113204	36.5031	chloroplast	NC_041727.1/KY886917.1	67	2019-04-22T00:00:00Z
Gnetum ula	Eukaryota;Plants;Land Plants			PRJNA306319	0.113249	38.4533	chloroplast	NC_028734.1/AP014923.1	66	2015-12-17T00:00:00Z
Aegilops cylindrica	Eukaryota;Plants;Land Plants			PRJNA232211	0.11349	37.2896	chloroplast	NC_023096.1/KF534489.1	77	2013-12-20T00:00:00Z
Aegilops speltoides	Eukaryota;Plants;Land Plants			PRJNA217237	0.113536	37.2543	chloroplast	NC_022135.1/JQ740834.1	77	2013-08-27T00:00:00Z
Aegilops geniculata	Eukaryota;Plants;Land Plants			PRJNA232208	0.113893	37.1919	chloroplast	NC_023097.1/KF534490.1	79	2013-12-20T00:00:00Z
Pinus pinceana	Eukaryota;Plants;Land Plants			PRJNA496189	0.114082	38.8098	plastid	NC_039587.1/MH612866.1	66	2018-11-06T00:00:00Z
Aegilops tauschii subsp. tauschii	Eukaryota;Plants;Land Plants			PRJNA371621	0.114112	37.259	chloroplast	Pltd:NC_022133.1/	80	2013-08-27T00:00:00Z
Cassytha filiformis	Eukaryota;Plants;Land Plants			PRJNA413205	0.114622	36.9257	chloroplast	NC_036001.1/LC210517.1	67	2017-10-06T00:00:00Z
Selaginella lepidophylla	Eukaryota;Plants;Land Plants			PRJNA524590	0.114693	51.936	plastid	NC_040927.1/MK089531.1	64	2019-02-27T00:00:00Z
Secale cereale	Eukaryota;Plants;Land Plants			PRJNA212610	0.114843	37.2117	chloroplast	NC_021761.1/KC912691.1	77	2013-07-22T00:00:00Z
Gnetum parvifolium	Eukaryota;Plants;Land Plants			PRJNA33797	0.114914	38.1833	chloroplast	NC_011942.1/AP009569.1	66	2009-01-28T00:00:00Z
Gnetum montanum	Eukaryota;Plants;Land Plants			PRJNA207630	0.115019	38.1563	chloroplast	NC_021438.1/KC427271.1	65	2013-06-17T00:00:00Z
Gnetum gnemon	Eukaryota;Plants;Land Plants			PRJNA274089	0.115022	38.1536	plastid	NC_026301.1/KP099649.1	66	2015-02-04T00:00:00Z
Pinus strobus	Eukaryota;Plants;Land Plants			PRJNA274090	0.115576	38.771	plastid	NC_026302.1/KP099650.1	70	2015-02-04T00:00:00Z
Dendrophthoe pentandra	Eukaryota;Plants;Land Plants			PRJNA579623	0.115721	36.9708	chloroplast	NC_045107.1/MN175255.1	67	2019-10-29T00:00:00Z
Triticum urartu	Eukaryota;Plants;Land Plants			PRJNA212604	0.115773	37.3775	chloroplast	NC_021762.1/KC912693.1	60	2013-07-22T00:00:00Z
Triticum monococcum	Eukaryota;Plants;Land Plants			PRJNA212608	0.116399	37.3706	chloroplast	NC_021760.1/KC912690.1	79	2013-07-22T00:00:00Z
Pinus monophylla	Eukaryota;Plants;Land Plants			PRJNA31043	0.116479	38.7297	chloroplast	NC_011158.4/EU998745.4	70	2008-08-25T00:00:00Z
Pinus sibirica	Eukaryota;Plants;Land Plants			PRJNA304825	0.116635	38.7234	chloroplast	NC_028552.2/KT723438.2	81	2015-12-03T00:00:00Z
Pinus morrisonicola	Eukaryota;Plants;Land Plants			PRJNA496138	0.116636	38.7479	chloroplast	NC_039616.1/MG897305.1	73	2018-11-06T00:00:00Z
Erodium manescavi	Eukaryota;Plants;Land Plants			PRJNA336210	0.11681	39.1217	plastid	NC_030720.1/KF751825.1	75	2016-08-03T00:00:00Z
Erodium rupestre	Eukaryota;Plants;Land Plants			PRJNA336208	0.11681	38.8528	plastid	NC_030719.1/KF751824.1	75	2016-08-03T00:00:00Z
Pinus nelsonii	Eukaryota;Plants;Land Plants			PRJNA31041	0.116834	38.8877	chloroplast	NC_011159.4/EU998746.4	70	2008-08-25T00:00:00Z
Erodium carvifolium	Eukaryota;Plants;Land Plants			PRJNA62577	0.116935	38.9575	chloroplast	NC_015083.1/HQ713469.1	75	2011-02-10T00:00:00Z
Pinus krempfii	Eukaryota;Plants;Land Plants			PRJNA31031	0.116989	38.9122	chloroplast	NC_011155.4/EU998742.4	69	2008-08-25T00:00:00Z
Cheilolejeunea xanthocarpa	Eukaryota;Plants;Land Plants			PRJNA553902	0.117138	30.5289	chloroplast	NC_043777.1/MH064504.1	81	2019-07-22T00:00:00Z
Pinus koraiensis	Eukaryota;Plants;Land Plants			PRJNA12238	0.11719	38.7951	chloroplast	NC_004677.2/AY228468.2	273	2003-04-05T00:00:00Z
Pinus lambertiana	Eukaryota;Plants;Land Plants			PRJNA31033	0.117239	38.7917	chloroplast	NC_011156.4/EU998743.4	71	2008-08-25T00:00:00Z
Pinus armandii	Eukaryota;Plants;Land Plants			PRJNA317889	0.117265	38.7891	chloroplast	NC_029847.1/KP412541.1	74	2016-04-09T00:00:00Z
Pinus squamata	Eukaryota;Plants;Land Plants			PRJNA496126	0.117327	38.7285	chloroplast	NC_039614.1/MG897303.1	73	2018-11-06T00:00:00Z
Pinus pumila	Eukaryota;Plants;Land Plants			PRJNA527579	0.1174	38.7973	chloroplast	NC_041108.1/MH046871.1	73	2019-03-18T00:00:00Z
Radula japonica	Eukaryota;Plants;Land Plants			PRJNA553879	0.117444	30.4605	chloroplast	NC_043781.1/MH064508.1	82	2019-07-22T00:00:00Z
Dionaea muscipula	Eukaryota;Plants;Land Plants			PRJNA394358	0.117589	38.3862	chloroplast	NC_035417.1/KY679201.1	67	2017-07-14T00:00:00Z
Pinus gerardiana	Eukaryota;Plants;Land Plants			PRJNA31039	0.117618	38.8997	chloroplast	NC_011154.4/EU998741.4	70	2008-08-25T00:00:00Z
Plagiochila chinensis	Eukaryota;Plants;Land Plants			PRJNA553920	0.117699	33.5755	chloroplast	NC_043784.1/MH064511.1	81	2019-07-22T00:00:00Z
Keteleeria davidiana	Eukaryota;Plants;Land Plants			PRJNA33795	0.11772	38.5508	chloroplast	NC_011930.1/AP010820.1	75	2009-01-28T00:00:00Z
Erodium reichardii	Eukaryota;Plants;Land Plants			PRJNA336209	0.117753	39.1701	plastid	NC_030721.1/KF771021.1	74	2016-08-03T00:00:00Z
Jubula hutchinsiae	Eukaryota;Plants;Land Plants			PRJNA553887	0.117817	31.554	chloroplast	NC_043782.1/MH064509.1	83	2019-07-22T00:00:00Z
Pinus bungeana	Eukaryota;Plants;Land Plants			PRJNA302503	0.117861	38.8322	chloroplast	NC_028421.1/KR873010.1	71	2015-11-17T00:00:00Z
Scapania ciliata	Eukaryota;Plants;Land Plants			PRJNA553876	0.118019	33.8954	chloroplast	NC_043786.1/MH064513.1	84	2019-07-22T00:00:00Z
Pinus wangii	Eukaryota;Plants;Land Plants			PRJNA496089	0.118073	38.7006	chloroplast	NC_039613.1/MG897302.1	73	2018-11-06T00:00:00Z
Heteroscyphus argutus	Eukaryota;Plants;Land Plants			PRJNA553884	0.118095	33.9405	chloroplast	NC_043788.1/MH064515.1	82	2019-07-22T00:00:00Z
Halophytum ameghinoi	Eukaryota;Plants;Land Plants			PRJNA524541	0.118334	36.3632	plastid	NC_040949.1/MK397922.1	72	2019-02-27T00:00:00Z
Pinus aristata	Eukaryota;Plants;Land Plants			PRJNA504079	0.118422	38.6204	plastid	NC_039809.1/MG020108.1	74	2018-11-09T00:00:00Z
Schoepfia jasminodora	Eukaryota;Plants;Land Plants			PRJNA381659	0.118743	38.1269	chloroplast	NC_034228.1/KX775962.1	72	2017-04-05T00:00:00Z
Geosiris australiensis	Eukaryota;Plants;Land Plants			PRJNA550875	0.119004	38.5491	chloroplast	NC_042825.1/MH142524.1	39	2019-06-25T00:00:00Z
Ptilidium pulcherrimum	Eukaryota;Plants;Land Plants			PRJNA66175	0.119007	33.2258	chloroplast	NC_015402.1/HM222519.1	80	2011-04-27T00:00:00Z
Cedrus deodara	Eukaryota;Plants;Land Plants			PRJNA56103	0.119299	39.1445	chloroplast	NC_014575.1/AB480043.1	75	2010-10-20T00:00:00Z
Abies religiosa	Eukaryota;Plants;Land Plants			PRJNA496173	0.119423	38.3611	plastid	NC_039582.1/MH612854.1	65	2018-11-06T00:00:00Z
Pinus tabuliformis	Eukaryota;Plants;Land Plants			PRJNA304800	0.119646	38.5262	chloroplast	NC_028531.1/KT740995.1	74	2015-12-03T00:00:00Z
Pinus thunbergii	Eukaryota;Plants;Land Plants			PRJNA12228	0.119707	38.4957	chloroplast	NC_001631.1/D17510.1	123	1994-08-13T00:00:00Z
Pinus yunnanensis	Eukaryota;Plants;Land Plants			PRJNA553943	0.119707	38.5207	chloroplast	NC_043856.1/MK007968.1	75	2019-07-22T00:00:00Z
Welwitschia mirabilis	Eukaryota;Plants;Land Plants			PRJNA29587	0.119726	36.7255	chloroplast	NC_010654.1/EU342371.1	70	2008-05-08T00:00:00Z
Pinus crassicorticea	Eukaryota;Plants;Land Plants			PRJNA527598	0.119729	38.5479	chloroplast	NC_041150.1/MK105897.1	72	2019-03-18T00:00:00Z
Pinus massoniana	Eukaryota;Plants;Land Plants			PRJNA207605	0.119739	38.5455	chloroplast	NC_021439.1/KC427272.1	73	2013-06-17T00:00:00Z
Pinus taiwanensis	Eukaryota;Plants;Land Plants			PRJNA287946	0.119741	38.5089	chloroplast	NC_027415.1/KP771703.1	92	2015-06-24T00:00:00Z
Pinus sylvestris	Eukaryota;Plants;Land Plants			PRJNA390345	0.119758	38.5001	chloroplast	NC_035069.1/KR476379.1	73	2017-06-13T00:00:00Z
Frullania nodulosa	Eukaryota;Plants;Land Plants			PRJNA553951	0.119809	31.9024	chloroplast	NC_043783.1/MH064510.1	84	2019-07-22T00:00:00Z
Pinus densiflora	Eukaryota;Plants;Land Plants			PRJNA546323	0.119875	38.4893	chloroplast	NC_042394.1/MK285358.1	73	2019-06-06T00:00:00Z
Pinus elliottii	Eukaryota;Plants;Land Plants			PRJNA550933	0.119876	38.4556	chloroplast	NC_042788.1/MK135066.1	69	2019-06-25T00:00:00Z
Schistochila macrodonta	Eukaryota;Plants;Land Plants			PRJNA553919	0.119965	32.1269	chloroplast	NC_043779.1/MH064506.1	81	2019-07-22T00:00:00Z
Pinus pinea	Eukaryota;Plants;Land Plants			PRJNA496201	0.119971	38.4451	plastid	NC_039585.1/MH612860.1	74	2018-11-06T00:00:00Z
Abies fanjingshanensis	Eukaryota;Plants;Land Plants			PRJNA550938	0.120057	38.2976	chloroplast	NC_042777.1/MH706717.1	74	2019-06-25T00:00:00Z
Bazzania praerupta	Eukaryota;Plants;Land Plants			PRJNA553921	0.120158	35.4641	chloroplast	NC_043785.1/MH064512.1	84	2019-07-22T00:00:00Z
Picea sitchensis	Eukaryota;Plants;Land Plants			PRJNA31027	0.120176	39.2616	chloroplast	NC_011152.3/EU998739.3	64	2008-08-25T00:00:00Z
Lathyrus odoratus	Eukaryota;Plants;Land Plants			PRJNA285563	0.120289	35.1595	chloroplast	NC_027150.1/KJ850237.1	73	2015-06-02T00:00:00Z
Marchantia polymorpha subsp. ruderalis Kitashirakawa-2	Eukaryota;Plants;Land Plants		SAMD00012128	PRJNA453301	0.120304	28.9691	chloroplast	NC_037507.1/LC192146.1	90	2018-04-24T00:00:00Z
Marchantia polymorpha	Eukaryota;Plants;Land Plants			PRJNA547730	0.120314	28.9709	plastid	NC_042505.1/MH635409.1	85	2019-06-07T00:00:00Z
Pinus teocote	Eukaryota;Plants;Land Plants			PRJNA496188	0.120396	38.4556	plastid	NC_039586.1/MH612861.1	72	2018-11-06T00:00:00Z
Nicotiana sylvestris CCMP2878	Eukaryota;Plants;Land Plants			PRJNA317438	0.120426	36.6258	chloroplast	HM222967.2	78	2010-07-07T00:00:00Z
Abies concolor	Eukaryota;Plants;Land Plants			PRJNA496181	0.120427	38.3369	plastid	NC_039581.1/MH612853.1	71	2018-11-06T00:00:00Z
Pinus contorta	Eukaryota;Plants;Land Plants			PRJNA31029	0.120438	38.8905	chloroplast	NC_011153.4/EU998740.4	70	2008-08-25T00:00:00Z
Calypogeia fissa	Eukaryota;Plants;Land Plants			PRJNA553908	0.1205	35.2813	chloroplast	NC_043787.1/MH064514.1	83	2019-07-22T00:00:00Z
Pinus greggii	Eukaryota;Plants;Land Plants			PRJNA412066	0.120501	38.4495	plastid	NC_035947.1/KY963967.1	73	2017-09-28T00:00:00Z
Apopellia endiviifolia	Eukaryota;Plants;Land Plants			PRJNA182679	0.120546	35.8942	chloroplast	NC_019628.1/JX827163.1	88	2012-12-07T00:00:00Z
Pinus oocarpa	Eukaryota;Plants;Land Plants			PRJNA412070	0.120596	38.4714	plastid	NC_035949.1/KY963969.1	73	2017-09-28T00:00:00Z
Aneura pinguis	Eukaryota;Plants;Land Plants			PRJNA281853	0.120698	40.0205	chloroplast	NC_035617.1/KY702720.1	73	2017-08-28T00:00:00Z
Pinus jaliscana	Eukaryota;Plants;Land Plants			PRJNA412060	0.120715	38.4608	plastid	NC_035948.1/KY963968.1	73	2017-09-28T00:00:00Z
Pinus parviflora	Eukaryota;Plants;Land Plants			PRJNA496190	0.120724	38.5789	chloroplast	NC_039615.1/MG897304.1	73	2018-11-06T00:00:00Z
Tsuga sieboldii	Eukaryota;Plants;Land Plants		SAMN08848266	PRJNA528058	0.120797	38.111	chloroplast	NC_041254.1/MH171103.1	72	2019-03-26T00:00:00Z
Tsuga diversifolia	Eukaryota;Plants;Land Plants		SAMN08848265	PRJNA528048	0.120802	38.1384	chloroplast	NC_041253.1/MH171102.1	71	2019-03-26T00:00:00Z
Pisum fulvum	Eukaryota;Plants;Land Plants			PRJNA433131	0.120837	34.8511	chloroplast	NC_036828.1/MG458702.1	73	2018-02-06T00:00:00Z
Aphyllon californicum	Eukaryota;Plants;Land Plants			PRJNA267327	0.12084	36.6907	chloroplast	NC_025651.1/HG515539.2	45	2014-11-03T00:00:00Z
Tsuga chinensis	Eukaryota;Plants;Land Plants			PRJNA328694	0.120859	38.065	chloroplast	NC_030630.1/LC095866.1	73	2016-07-12T00:00:00Z
Nothotsuga longibracteata	Eukaryota;Plants;Land Plants			PRJNA453309	0.1209	39.3499	chloroplast	NC_037407.1/MG602009.2	85	2018-04-24T00:00:00Z
Gymnomitrion concinnatum	Eukaryota;Plants;Land Plants			PRJNA509841	0.120994	34.5149	chloroplast	NC_040133.1/MH705066.1	87	2018-12-14T00:00:00Z
Lathyrus sativus	Eukaryota;Plants;Land Plants			PRJNA48059	0.12102	35.1124	chloroplast	NC_014063.1/HM029371.1	74	2010-04-23T00:00:00Z
Marchantia polymorpha	Eukaryota;Plants;Land Plants			PRJNA20411	0.121024	28.8083	chloroplast	NC_001319.1/X04465.1	89	1986-11-18T00:00:00Z
Callitris rhomboidea	Eukaryota;Plants;Land Plants			PRJNA389095	0.121117	34.7102	chloroplast	NC_034940.1/LC177555.1	81	2017-06-02T00:00:00Z
Abies sibirica	Eukaryota;Plants;Land Plants			PRJNA390367	0.121224	38.2606	chloroplast	NC_035067.1/KR476376.1	74	2017-06-13T00:00:00Z
Abies alba	Eukaryota;Plants;Land Plants			PRJNA546344	0.121243	38.267	chloroplast	NC_042410.1/MH706724.1	74	2019-06-06T00:00:00Z
Selaginella vardei	Eukaryota;Plants;Land Plants			PRJNA527610	0.121254	53.2139	chloroplast	NC_041099.1/MG272482.1	64	2019-03-18T00:00:00Z
Lathyrus clymenum	Eukaryota;Plants;Land Plants			PRJNA285564	0.121263	34.9488	chloroplast	NC_027148.1/KJ850235.1	75	2015-06-02T00:00:00Z
Abies kawakamii	Eukaryota;Plants;Land Plants			PRJNA550902	0.12129	38.2529	chloroplast	NC_042776.1/MH706726.1	74	2019-06-25T00:00:00Z
Medicago monspeliaca	Eukaryota;Plants;Land Plants			PRJNA550942	0.121313	33.9246	plastid	NC_042855.1/MK460506.1	76	2019-06-25T00:00:00Z
Abies chensiensis	Eukaryota;Plants;Land Plants			PRJNA532145	0.121329	38.258	chloroplast	NC_041464.1/MH796673.1	74	2019-04-10T00:00:00Z
Taxillus chinensis	Eukaryota;Plants;Land Plants			PRJNA418525	0.121363	37.3326	chloroplast	NC_036306.1/KY996492.1	66	2017-11-16T00:00:00Z
Abies koreana	Eukaryota;Plants;Land Plants			PRJNA281852	0.121373	38.2499	chloroplast	NC_026892.1/KP742350.1	74	2015-04-22T00:00:00Z
Erodium crassifolium	Eukaryota;Plants;Land Plants			PRJNA270439	0.121393	39.0714	plastid	NC_025906.1/KF977221.1	76	2014-12-22T00:00:00Z
Abies beshanzuensis	Eukaryota;Plants;Land Plants			PRJNA608373	0.121399	38.2565	chloroplast	NC_045884.1/MH476330.1	74	2020-02-24T00:00:00Z
Cuscuta reflexa	Eukaryota;Plants;Land Plants			PRJNA20675	0.121521	38.2206	chloroplast	NC_009766.1/AM711640.1	69	2007-08-28T00:00:00Z
Pinus taeda	Eukaryota;Plants;Land Plants			PRJNA207631	0.12153	38.5008	chloroplast	NC_021440.1/KC427273.1	71	2013-06-17T00:00:00Z
Abies balsamea	Eukaryota;Plants;Land Plants			PRJNA550691	0.121574	38.2483	chloroplast	NC_042778.1/MH706725.1	74	2019-06-25T00:00:00Z
Riccia fluitans	Eukaryota;Plants;Land Plants			PRJNA550934	0.121682	28.9509	chloroplast	NC_042887.1/MK645896.1	86	2019-06-25T00:00:00Z
Scurrula parasitica	Eukaryota;Plants;Land Plants			PRJNA522234	0.12175	37.2115	chloroplast	NC_040862.1/MH101514.1	65	2019-02-25T00:00:00Z
Abies fargesii	Eukaryota;Plants;Land Plants			PRJNA550686	0.121799	38.2704	chloroplast	NC_042775.1/MH706716.1	74	2019-06-25T00:00:00Z
Porella perrottetiana	Eukaryota;Plants;Land Plants			PRJNA553893	0.121806	33.5591	chloroplast	NC_043780.1/MH064507.1	84	2019-07-22T00:00:00Z
Medicago biflora	Eukaryota;Plants;Land Plants			PRJNA546327	0.121957	34.0833	plastid	NC_042415.1/MK460504.1	75	2019-06-06T00:00:00Z
Pisum sativum subsp. elatius	Eukaryota;Plants;Land Plants			PRJNA492985	0.121958	34.7939	chloroplast	NC_039371.1/MG882489.1	74	2018-09-25T00:00:00Z
Dumortiera hirsuta	Eukaryota;Plants;Land Plants			PRJNA496162	0.12205	28.6956	chloroplast	NC_039590.1/MH355546.1	89	2018-11-06T00:00:00Z
Lathyrus tingitanus	Eukaryota;Plants;Land Plants			PRJNA285562	0.122165	34.8741	chloroplast	NC_027151.1/KJ850238.1	74	2015-06-02T00:00:00Z
Pisum sativum	Eukaryota;Plants;Land Plants			PRJNA48047	0.122169	34.828	chloroplast	NC_014057.1/HM029370.1	74	2010-04-23T00:00:00Z
Pisum abyssinicum	Eukaryota;Plants;Land Plants			PRJNA479111	0.122174	34.7905	chloroplast	NC_037830.1/MG859923.1	74	2018-07-11T00:00:00Z
Taxillus vestitus	Eukaryota;Plants;Land Plants			PRJNA579612	0.1222	37.3486	chloroplast	NC_045109.1/MN175257.1	68	2019-10-29T00:00:00Z
Pseudolarix amabilis	Eukaryota;Plants;Land Plants			PRJNA328739	0.122234	38.4647	chloroplast	NC_030631.1/LC095867.1	74	2016-07-12T00:00:00Z
Lathyrus graminifolius	Eukaryota;Plants;Land Plants			PRJNA284069	0.122438	34.9589	chloroplast	NC_027074.1/KJ806193.1	75	2015-05-14T00:00:00Z
Selaginella indica	Eukaryota;Plants;Land Plants			PRJNA527611	0.12246	53.553	chloroplast	NC_041098.1/MK156801.1	64	2019-03-18T00:00:00Z
Vicia sativa	Eukaryota;Plants;Land Plants			PRJNA285560	0.122467	35.1507	chloroplast	NC_027155.1/KJ850242.1	75	2015-06-02T00:00:00Z
Larix decidua	Eukaryota;Plants;Land Plants			PRJNA74369	0.122474	38.7764	chloroplast	NC_016058.1/AB501189.1	72	2011-10-17T00:00:00Z
Pseudotsuga sinensis var. wilsoniana	Eukaryota;Plants;Land Plants			PRJNA74311	0.122513	38.7551	chloroplast	NC_016064.1/AB601120.1	73	2011-10-14T00:00:00Z
Larix sibirica	Eukaryota;Plants;Land Plants			PRJNA433125	0.12256	38.7549	chloroplast	NC_036811.1/MF795085.1	72	2018-02-06T00:00:00Z
Taxillus sutchuenensis	Eukaryota;Plants;Land Plants			PRJNA418524	0.122562	37.3313	chloroplast	NC_036307.1/KY996493.1	66	2017-11-16T00:00:00Z
Larix occidentalis	Eukaryota;Plants;Land Plants			PRJNA496202	0.122583	38.7664	plastid	NC_039583.1/MH612855.1	70	2018-11-06T00:00:00Z
Larix gmelinii	Eukaryota;Plants;Land Plants			PRJNA563369	0.122588	38.7444	chloroplast	NC_044421.1/MK468630.1	71	2019-09-06T00:00:00Z
Larix cajanderi	Eukaryota;Plants;Land Plants			PRJNA563429	0.122591	38.7484	chloroplast	NC_044422.1/MK468640.1	71	2019-09-06T00:00:00Z
Reboulia hemisphaerica	Eukaryota;Plants;Land Plants			PRJNA546353	0.122596	28.7987	chloroplast	NC_042418.1/MK477551.1	87	2019-06-06T00:00:00Z
Syntrichia ruralis	Eukaryota;Plants;Land Plants			PRJNA33919	0.12263	28.3821	chloroplast	NC_012052.1/FJ546412.1	81	2009-02-20T00:00:00Z
Lessertia frutescens	Eukaryota;Plants;Land Plants			PRJNA415455	0.1227	34.1891	chloroplast	NC_036151.1/MF286764.1	76	2017-10-23T00:00:00Z
Medicago lupulina	Eukaryota;Plants;Land Plants			PRJNA550918	0.12277	34.0116	plastid	NC_042847.1/MK460497.1	77	2019-06-25T00:00:00Z
Carmichaelia australis	Eukaryota;Plants;Land Plants			PRJNA412055	0.122805	34.2763	plastid	NC_035957.1/MF597719.1	76	2017-10-06T00:00:00Z
Physcomitrella patens	Eukaryota;Plants;Land Plants			PRJNA28131	0.12289	28.5296	chloroplast	Pltd:NC_005087.1/	85	2003-09-08T00:00:00Z
Nyholmiella obtusifolia	Eukaryota;Plants;Land Plants			PRJNA283056	0.122895	28.4495	chloroplast	NC_026979.1/KP765733.1	81	2015-05-05T00:00:00Z
Physcomitrella patens	Eukaryota;Plants;Land Plants			PRJNA453215	0.122905	28.5082	chloroplast	NC_037465.1/KY126308.1	84	2018-04-24T00:00:00Z
Lens culinaris	Eukaryota;Plants;Land Plants			PRJNA285561	0.122967	34.4255	chloroplast	NC_027152.1/KJ850239.1	73	2015-06-02T00:00:00Z
Macrosolen cochinchinensis	Eukaryota;Plants;Land Plants			PRJNA492990	0.122986	36.2244	chloroplast	NC_039376.1/MG808039.1	67	2018-09-25T00:00:00Z
Stoneobryum bunyaense	Eukaryota;Plants;Land Plants			PRJNA348013	0.12304	28.1006	chloroplast	NC_042479.1/MK521875.1	82	2019-06-06T00:00:00Z
Lathyrus inconspicuus	Eukaryota;Plants;Land Plants			PRJNA285543	0.123153	34.7446	chloroplast	NC_027149.1/KJ850236.1	74	2015-06-02T00:00:00Z
Drosophyllum lusitanicum	Eukaryota;Plants;Land Plants			PRJNA524607	0.123305	35.932	plastid	NC_040939.1/MK397933.1	70	2019-02-27T00:00:00Z
Orthotrichum rogeri	Eukaryota;Plants;Land Plants			PRJNA273012	0.123363	28.361	chloroplast	NC_026212.1/KP119739.1	81	2015-01-21T00:00:00Z
Tibetia liangshanensis	Eukaryota;Plants;Land Plants			PRJNA414796	0.123372	34.6772	chloroplast	NC_036109.1/MF193597.1	76	2017-10-18T00:00:00Z
Medicago blancheana	Eukaryota;Plants;Land Plants			PRJNA550946	0.123387	34.4915	plastid	NC_042852.1/MK460502.1	75	2019-06-25T00:00:00Z
Lewinskya incana	Eukaryota;Plants;Land Plants			PRJNA541695	0.123464	28.3897	chloroplast	NC_042174.1/MK521877.1	82	2019-05-12T00:00:00Z
Picea chihuahuana	Eukaryota;Plants;Land Plants			PRJNA496132	0.123488	38.7536	plastid	NC_039584.1/MH612856.1	57	2018-11-06T00:00:00Z
Medicago laciniata	Eukaryota;Plants;Land Plants			PRJNA550944	0.1235	33.9644	plastid	NC_042853.1/MK460503.1	76	2019-06-25T00:00:00Z
Ulota bruchii	Eukaryota;Plants;Land Plants			PRJNA546329	0.123536	28.3836	chloroplast	NC_042480.1/MK521876.1	82	2019-06-06T00:00:00Z
Tolypanthus maclurei	Eukaryota;Plants;Land Plants			PRJNA541649	0.123581	36.7824	chloroplast	NC_042257.1/MH922027.1	70	2019-05-12T00:00:00Z
Astragalus mongholicus	Eukaryota;Plants;Land Plants			PRJNA317865	0.123582	34.0907	chloroplast	NC_029828.1/KU666554.1	76	2016-04-09T00:00:00Z
Astragalus mongholicus var. nakaianus	Eukaryota;Plants;Land Plants			PRJNA300822	0.123633	34.0726	chloroplast	NC_028171.1/KR296789.1	75	2015-11-01T00:00:00Z
Medicago pironae	Eukaryota;Plants;Land Plants			PRJNA550951	0.123712	33.9312	plastid	NC_042846.1/MK460496.1	76	2019-06-25T00:00:00Z
Lathyrus littoralis	Eukaryota;Plants;Land Plants			PRJNA284081	0.123734	34.815	chloroplast	NC_027076.1/KJ806196.1	74	2015-05-14T00:00:00Z
Scurrula notothixoides	Eukaryota;Plants;Land Plants			PRJNA529129	0.12381	37.3492	chloroplast	NC_041305.1/MH220878.1	63	2019-03-26T00:00:00Z
Erodium trifolium	Eukaryota;Plants;Land Plants			PRJNA257604	0.123865	39.3	plastid	NC_024635.1/KF441758.1	75	2014-08-06T00:00:00Z
Lathyrus davidii	Eukaryota;Plants;Land Plants			PRJNA284026	0.123895	34.8876	chloroplast	NC_027073.1/KJ806192.1	74	2015-05-14T00:00:00Z
Buxbaumia aphylla	Eukaryota;Plants;Land Plants			PRJNA609463	0.123907	29.2816	chloroplast	NC_046056.1/MN496310.1	84	2020-03-07T00:00:00Z
Lathyrus ochroleucus	Eukaryota;Plants;Land Plants			PRJNA284047	0.123911	34.9186	chloroplast	NC_027077.1/KJ806197.1	75	2015-05-14T00:00:00Z
Medicago truncatula Variety Jema Long A-17	Eukaryota;Plants;Land Plants	A17		PRJNA30099	0.124033	33.9724	chloroplast	Pltd:NC_003119.6/	76	2001-08-31T00:00:00Z
Medicago polymorpha	Eukaryota;Plants;Land Plants			PRJNA550919	0.124066	34.1036	plastid	NC_042848.1/MK460498.1	75	2019-06-25T00:00:00Z
Picea abies	Eukaryota;Plants;Land Plants			PRJNA207558	0.124084	38.7278	chloroplast	NC_021456.1/HF937082.1	74	2013-05-17T00:00:00Z
Vicia sepium	Eukaryota;Plants;Land Plants			PRJNA496196	0.124095	35.0256	chloroplast	NC_039595.1/MG682352.1	76	2018-11-06T00:00:00Z
Picea crassifolia	Eukaryota;Plants;Land Plants			PRJNA359050	0.124126	38.7179	chloroplast	NC_032366.1/KY204450.1	73	2016-12-27T00:00:00Z
Picea asperata	Eukaryota;Plants;Land Plants			PRJNA358902	0.124145	38.7136	chloroplast	NC_032367.1/KY204451.1	73	2016-12-27T00:00:00Z
Picea jezoensis	Eukaryota;Plants;Land Plants			PRJNA313673	0.124146	38.7576	chloroplast	NC_029374.1/KT337318.1	74	2016-03-01T00:00:00Z
Picea morrisonicola	Eukaryota;Plants;Land Plants			PRJNA74463	0.124168	38.7902	chloroplast	NC_016069.1/AB480556.1	71	2011-10-19T00:00:00Z
Medicago marina	Eukaryota;Plants;Land Plants			PRJNA550952	0.124182	33.8455	plastid	NC_042845.1/MK460495.1	76	2019-06-25T00:00:00Z
Picea neoveitchii	Eukaryota;Plants;Land Plants			PRJNA555919	0.124234	38.7728	chloroplast	NC_043913.1/MH986606.1	77	2019-07-22T00:00:00Z
Lathyrus japonicus	Eukaryota;Plants;Land Plants			PRJNA284040	0.124242	34.902	chloroplast	NC_027075.1/KJ806194.1	75	2015-05-14T00:00:00Z
Medicago arborea	Eukaryota;Plants;Land Plants			PRJNA550954	0.124273	34.0533	plastid	NC_042856.1/MK460507.1	76	2019-06-25T00:00:00Z
Lathyrus palustris	Eukaryota;Plants;Land Plants			PRJNA284080	0.124287	34.8524	chloroplast	NC_027078.1/KJ806199.1	75	2015-05-14T00:00:00Z
Sanionia uncinata	Eukaryota;Plants;Land Plants			PRJNA267381	0.124374	29.3164	chloroplast	NC_025668.1/KM111545.1	82	2014-11-14T00:00:00Z
Medicago falcata 1210	Eukaryota;Plants;Land Plants			PRJNA356587	0.12443	33.9572	chloroplast	NC_032066.1/KX831887.1	71	2016-12-07T00:00:00Z
Corallorhiza striata var. involuta	Eukaryota;Plants;Land Plants			PRJNA524601	0.124433	36.6077	plastid	NC_040981.1/MG874038.1	46	2019-02-27T00:00:00Z
Corallorhiza bentleyi	Eukaryota;Plants;Land Plants			PRJNA524602	0.124482	36.5989	plastid	NC_040979.1/MG874035.1	45	2019-02-27T00:00:00Z
Medicago radiata	Eukaryota;Plants;Land Plants			PRJNA550940	0.124564	33.8942	plastid	NC_042854.1/MK460505.1	76	2019-06-25T00:00:00Z
Helixanthera parasitica	Eukaryota;Plants;Land Plants			PRJNA492991	0.124846	36.4785	chloroplast	NC_039375.1/MG808038.1	67	2018-09-25T00:00:00Z
Fissidens nobilis	Eukaryota;Plants;Land Plants			PRJNA557919	0.124962	29.2033	chloroplast	NC_044155.1/MK876184.1	82	2019-08-01T00:00:00Z
Medicago orbicularis	Eukaryota;Plants;Land Plants			PRJNA550941	0.125015	33.7959	plastid	NC_042850.1/MK460500.1	76	2019-06-25T00:00:00Z
Malania oleifera	Eukaryota;Plants;Land Plants			PRJNA495575	0.12505	38.1695	chloroplast	NC_039426.1/MG799332.1	57	2018-10-10T00:00:00Z
Pohlia nutans M211	Eukaryota;Plants;Land Plants			PRJNA608367	0.125199	29.4619	chloroplast	NC_045869.1/MN937553.1	80	2020-02-24T00:00:00Z
Medicago papillosa	Eukaryota;Plants;Land Plants			PRJNA285552	0.125203	33.8307	chloroplast	NC_027154.1/KJ850241.1	75	2015-06-02T00:00:00Z
Medicago hybrida	Eukaryota;Plants;Land Plants			PRJNA285554	0.125208	33.8173	chloroplast	NC_027153.1/KJ850240.1	75	2015-06-02T00:00:00Z
Cicer arietinum	Eukaryota;Plants;Land Plants			PRJNA190909	0.125319	33.9063	chloroplast	Pltd:NC_011163.1/	75	2008-08-26T00:00:00Z
Medicago sativa	Eukaryota;Plants;Land Plants			PRJNA550889	0.12533	33.8658	plastid	NC_042841.1/MK460489.1	76	2019-06-25T00:00:00Z
Cuscuta exaltata	Eukaryota;Plants;Land Plants			PRJNA27795	0.125373	38.1159	chloroplast	NC_009963.1/EU189132.1	67	2007-11-07T00:00:00Z
Lathyrus venosus	Eukaryota;Plants;Land Plants			PRJNA284046	0.125459	34.8759	chloroplast	NC_027080.1/KJ806202.1	75	2015-05-14T00:00:00Z
Medicago intertexta	Eukaryota;Plants;Land Plants			PRJNA550945	0.125621	33.8773	plastid	NC_042851.1/MK460501.1	76	2019-06-25T00:00:00Z
Trifolium grandiflorum	Eukaryota;Plants;Land Plants			PRJNA245706	0.125628	34.8043	plastid	NC_024034.1/KC894707.1	75	2014-05-01T00:00:00Z
Trigonella foenum-graecum	Eukaryota;Plants;Land Plants			PRJNA550700	0.125645	33.8772	plastid	NC_042857.1/MK460508.1	76	2019-06-25T00:00:00Z
Trifolium boissieri	Eukaryota;Plants;Land Plants			PRJNA268635	0.12574	34.8091	chloroplast	NC_025743.1/KJ788284.1	74	2015-01-13T00:00:00Z
Trifolium strictum	Eukaryota;Plants;Land Plants			PRJNA268634	0.125834	34.5392	chloroplast	NC_025745.1/KJ788292.1	75	2015-01-29T00:00:00Z
Barbeuia madagascariensis	Eukaryota;Plants;Land Plants			PRJNA529135	0.126006	36.8784	plastid	NC_041301.1/MK397915.1	76	2019-03-26T00:00:00Z
Medicago cretacea	Eukaryota;Plants;Land Plants			PRJNA550953	0.126021	33.738	plastid	NC_042842.1/MK460491.1	76	2019-06-25T00:00:00Z
Viscum crassulae	Eukaryota;Plants;Land Plants			PRJNA298016	0.126064	36.3664	chloroplast	NC_027959.1/KT070881.1	73	2015-10-07T00:00:00Z
Trifolium glanduliferum	Eukaryota;Plants;Land Plants			PRJNA268605	0.126149	34.4632	chloroplast	NC_025744.1/KJ788285.1	75	2014-12-03T00:00:00Z
Tahina spectabilis	Eukaryota;Plants;Land Plants			PRJNA319091	0.126251	36.4805	plastid	NC_029952.1/KT312919.1	79	2016-04-20T00:00:00Z
Medicago suffruticosa	Eukaryota;Plants;Land Plants			PRJNA550950	0.126394	34.1076	plastid	NC_042843.1/MK460492.1	76	2019-06-25T00:00:00Z
Lathyrus pubescens	Eukaryota;Plants;Land Plants			PRJNA284079	0.126421	35.0061	chloroplast	NC_027079.1/KJ806200.1	74	2015-05-14T00:00:00Z
Diphyscium foliosum	Eukaryota;Plants;Land Plants			PRJNA609461	0.126558	29.8559	chloroplast	NC_046057.1/MN496311.1	83	2020-03-07T00:00:00Z
Selaginella tamariscina	Eukaryota;Plants;Land Plants			PRJNA532012	0.1267	54.0608	chloroplast	NC_041646.1/MH598537.1	62	2019-04-10T00:00:00Z
Medicago tetraprostrata	Eukaryota;Plants;Land Plants			PRJNA550872	0.126778	33.6849	plastid	NC_042844.1/MK460493.1	76	2019-06-25T00:00:00Z
Trifolium aureum	Eukaryota;Plants;Land Plants			PRJNA245702	0.12697	34.6192	plastid	NC_024035.1/KC894708.1	76	2014-04-30T00:00:00Z
Hesperocyparis glabra	Eukaryota;Plants;Land Plants			PRJNA274083	0.126993	34.6893	plastid	NC_026297.1/KP099644.1	82	2015-02-13T00:00:00Z
Hesperocyparis lindleyi	Eukaryota;Plants;Land Plants			PRJNA496105	0.127005	34.6876	plastid	NC_039566.1/MH121050.1	82	2018-11-06T00:00:00Z
Hesperocyparis benthamii	Eukaryota;Plants;Land Plants			PRJNA496082	0.127007	34.6902	plastid	NC_039565.1/MH121049.1	82	2018-11-06T00:00:00Z
Calocedrus decurrens	Eukaryota;Plants;Land Plants			PRJNA608371	0.127112	34.8449	chloroplast	NC_045867.1/MK241803.1	83	2020-02-24T00:00:00Z
Hesperocyparis lusitanica	Eukaryota;Plants;Land Plants			PRJNA496149	0.127113	34.6762	plastid	NC_039567.1/MH121051.1	82	2018-11-06T00:00:00Z
Juniperus cedrus	Eukaryota;Plants;Land Plants			PRJNA300767	0.127126	34.9661	chloroplast	NC_028190.1/KT378453.1	82	2015-11-01T00:00:00Z
Callitropsis nootkatensis	Eukaryota;Plants;Land Plants			PRJNA274073	0.12715	34.7338	plastid	NC_026295.1/KP099642.1	82	2015-02-13T00:00:00Z
Hesperocyparis arizonica	Eukaryota;Plants;Land Plants			PRJNA496166	0.127158	34.6687	plastid	NC_039564.1/MH121048.1	81	2018-11-06T00:00:00Z
Melilotus albus	Eukaryota;Plants;Land Plants			PRJNA532191	0.127205	33.6127	chloroplast	NC_041419.1/MH191352.1	76	2019-04-10T00:00:00Z
Chamaecyparis formosensis	Eukaryota;Plants;Land Plants			PRJNA389032	0.127211	34.993	chloroplast	NC_034943.1/LC177668.1	83	2017-06-02T00:00:00Z
Calocedrus formosana	Eukaryota;Plants;Land Plants			PRJNA232232	0.127311	34.8328	chloroplast	NC_023121.1/AB831010.1	82	2013-12-20T00:00:00Z
Taxus florinii	Eukaryota;Plants;Land Plants			PRJNA532060	0.127335	34.7713	chloroplast	NC_041504.1/MH390463.1	82	2019-04-10T00:00:00Z
Juniperus microsperma	Eukaryota;Plants;Land Plants			PRJNA453337	0.127409	34.9591	chloroplast	NC_037430.1/MG878380.1	82	2018-04-24T00:00:00Z
Tetraphis pellucida	Eukaryota;Plants;Land Plants			PRJNA252478	0.127489	29.3916	chloroplast	NC_024291.1/KJ817846.1	82	2014-06-17T00:00:00Z
Callitropsis vietnamensis	Eukaryota;Plants;Land Plants			PRJNA274091	0.127541	34.7253	plastid	NC_026298.1/KP099645.1	82	2015-02-13T00:00:00Z
Juniperus recurva	Eukaryota;Plants;Land Plants			PRJNA550958	0.127602	35.0339	chloroplast	NC_042763.1/MK375217.1	82	2019-06-25T00:00:00Z
Juniperus bermudiana	Eukaryota;Plants;Land Plants			PRJNA245019	0.127659	34.8522	chloroplast	NC_024021.1/KF866297.1	82	2014-04-28T00:00:00Z
Juniperus tibetica	Eukaryota;Plants;Land Plants			PRJNA532131	0.127662	35.0433	chloroplast	NC_041523.1/MK135439.1	82	2019-04-10T00:00:00Z
Taxus mairei	Eukaryota;Plants;Land Plants			PRJNA190113	0.127665	34.7198	chloroplast	NC_020321.1/JN867586.1	78	2013-02-25T00:00:00Z
Juniperus sabina JSTL	Eukaryota;Plants;Land Plants			PRJNA496108	0.127739	34.8766	chloroplast	NC_039644.1/MH324744.1	82	2018-11-06T00:00:00Z
Juniperus monosperma	Eukaryota;Plants;Land Plants			PRJNA245028	0.127744	34.8752	chloroplast	NC_024022.1/KF866298.1	82	2014-04-24T00:00:00Z
Juniperus virginiana	Eukaryota;Plants;Land Plants			PRJNA245025	0.12777	34.8337	chloroplast	NC_024024.1/KF866300.1	82	2014-04-24T00:00:00Z
Juniperus scopulorum	Eukaryota;Plants;Land Plants			PRJNA245023	0.127774	34.8185	chloroplast	NC_024023.1/KF866299.1	82	2014-04-24T00:00:00Z
Chamaecyparis hodginsii	Eukaryota;Plants;Land Plants			PRJNA435360	0.127777	35.0235	chloroplast	NC_036996.1/MG269834.1	83	2018-02-22T00:00:00Z
Juniperus squamata	Eukaryota;Plants;Land Plants			PRJNA557937	0.127782	35.0589	chloroplast	NC_044076.1/MK085509.1	82	2019-08-02T00:00:00Z
Taxus contorta	Eukaryota;Plants;Land Plants			PRJNA532019	0.127806	34.7034	chloroplast	NC_041497.1/MH390443.1	82	2019-04-10T00:00:00Z
Cupressus tonkinensis	Eukaryota;Plants;Land Plants			PRJNA496081	0.127835	34.7127	plastid	NC_039562.1/MH121046.1	82	2018-11-06T00:00:00Z
Diplazium unilobum	Eukaryota;Plants;Land Plants			PRJNA407166	0.12784	43.6256	chloroplast	NC_035853.1/KY427347.1	83	2017-09-13T00:00:00Z
Glycyrrhiza inflata	Eukaryota;Plants;Land Plants			PRJNA541611	0.127927	34.2492	chloroplast	NC_042146.1/MH321931.1	75	2019-05-12T00:00:00Z
Glycyrrhiza lepidota	Eukaryota;Plants;Land Plants			PRJNA380376	0.127939	34.2421	chloroplast	NC_034229.1/KY038482.1	76	2017-03-24T00:00:00Z
Glycyrrhiza glabra	Eukaryota;Plants;Land Plants			PRJNA245701	0.127943	34.2379	chloroplast	NC_024038.1/KF201590.1	76	2014-05-01T00:00:00Z
Lophiocarpus tenuissimus	Eukaryota;Plants;Land Plants			PRJNA524565	0.127984	35.3443	plastid	NC_040951.1/MK397925.1	77	2019-02-27T00:00:00Z
Taxus fuana	Eukaryota;Plants;Land Plants			PRJNA483616	0.128001	34.6849	chloroplast	NC_038099.1/MF278259.1	82	2018-07-31T00:00:00Z
Taxus cuspidata	Eukaryota;Plants;Land Plants			PRJNA531981	0.128109	34.6728	chloroplast	NC_041498.1/MH390447.1	82	2019-04-10T00:00:00Z
Cupressus chengiana	Eukaryota;Plants;Land Plants			PRJNA387807	0.128151	34.7278	chloroplast	NC_034788.1/KY392754.1	82	2017-05-24T00:00:00Z
Cupressus gigantea	Eukaryota;Plants;Land Plants			PRJNA300811	0.128244	34.7057	chloroplast	NC_028155.1/KT315754.1	82	2015-11-01T00:00:00Z
Taxus calcicola	Eukaryota;Plants;Land Plants			PRJNA532095	0.12827	34.7361	chloroplast	NC_041501.1/MH390451.1	82	2019-04-10T00:00:00Z
Taxus wallichiana	Eukaryota;Plants;Land Plants			PRJNA532050	0.128276	34.6464	chloroplast	NC_041466.1/MH390446.1	82	2019-04-10T00:00:00Z
Cupressus jiangeensis	Eukaryota;Plants;Land Plants			PRJNA435316	0.128286	34.6842	chloroplast	NC_036939.1/MG596347.1	82	2018-02-22T00:00:00Z
Taxus canadensis	Eukaryota;Plants;Land Plants			PRJNA531990	0.128286	34.5751	chloroplast	NC_041499.1/MH390448.1	82	2019-04-10T00:00:00Z
Taxus brevifolia	Eukaryota;Plants;Land Plants			PRJNA532194	0.128304	34.6568	chloroplast	NC_041502.1/MH390457.1	82	2019-04-10T00:00:00Z
Cupressus torulosa	Eukaryota;Plants;Land Plants			PRJNA496080	0.128322	34.6441	plastid	NC_039563.1/MH121047.1	82	2018-11-06T00:00:00Z
Juniperus communis	Eukaryota;Plants;Land Plants			PRJNA390336	0.128334	34.8551	chloroplast	NC_035068.1/KR476378.1	80	2017-06-13T00:00:00Z
Taxus phytonii	Eukaryota;Plants;Land Plants			PRJNA532107	0.128361	34.685	chloroplast	NC_041495.1/MH390441.1	82	2019-04-10T00:00:00Z
Taxus chinensis	Eukaryota;Plants;Land Plants			PRJNA532125	0.128444	34.6774	chloroplast	NC_041496.1/MH390442.1	82	2019-04-10T00:00:00Z
Taxus baccata	Eukaryota;Plants;Land Plants			PRJNA390356	0.128653	34.5907	chloroplast	NC_035066.1/KR476375.1	81	2017-06-13T00:00:00Z
Elytranthe albida	Eukaryota;Plants;Land Plants			PRJNA579624	0.128658	37.5748	chloroplast	NC_045108.1/MN175256.1	68	2019-10-29T00:00:00Z
Haplomitrium blumei	Eukaryota;Plants;Land Plants			PRJNA553914	0.128728	44.3921	chloroplast	NC_043789.1/MH064516.1	82	2019-07-22T00:00:00Z
Viscum coloratum	Eukaryota;Plants;Land Plants			PRJNA394391	0.128744	36.2805	chloroplast	NC_035414.1/KY679303.1	70	2017-07-14T00:00:00Z
Monsonia speciosa	Eukaryota;Plants;Land Plants			PRJNA54067	0.128787	40.421	plastid	NC_014582.1/HM125538.1	76	2010-10-20T00:00:00Z
Viscum album	Eukaryota;Plants;Land Plants			PRJNA298187	0.128921	36.389	chloroplast	NC_028012.1/KT003925.1	71	2015-10-08T00:00:00Z
Rytidosperma semiannulare	Eukaryota;Plants;Land Plants			PRJNA430597	0.129095	38.3105	chloroplast	NC_036701.1/KY432793.1	82	2018-01-18T00:00:00Z
Cupressus sempervirens	Eukaryota;Plants;Land Plants			PRJNA274096	0.12915	34.6001	plastid	NC_026296.1/KP099643.1	82	2015-02-13T00:00:00Z
Taxus globosa	Eukaryota;Plants;Land Plants			PRJNA532044	0.129321	34.6224	chloroplast	NC_041500.1/MH390450.1	82	2019-04-10T00:00:00Z
Caragana korshinskii	Eukaryota;Plants;Land Plants			PRJNA394499	0.129331	34.3584	chloroplast	NC_035229.1/KX289923.1	76	2017-07-14T00:00:00Z
Physena sessiliflora	Eukaryota;Plants;Land Plants			PRJNA528067	0.129601	37.0005	plastid	NC_041256.1/MK397884.1	76	2019-03-26T00:00:00Z
Physena madagascariensis	Eukaryota;Plants;Land Plants			PRJNA528050	0.129627	36.9946	plastid	NC_041263.1/MK397883.1	76	2019-03-26T00:00:00Z
Taxus floridana	Eukaryota;Plants;Land Plants			PRJNA532045	0.129636	34.573	chloroplast	NC_041505.1/MH390468.1	82	2019-04-10T00:00:00Z
Fragaria vesca subsp. bracteata	Eukaryota;Plants;Land Plants			PRJNA177258	0.129788	36.1451	chloroplast	NC_018766.1/JQ396171.1	77	2012-10-14T00:00:00Z
Fragaria mandshurica	Eukaryota;Plants;Land Plants			PRJNA177280	0.129805	36.1411	plastid	NC_018767.1/JQ396172.1	74	2012-10-14T00:00:00Z
Pseudotaxus chienii	Eukaryota;Plants;Land Plants			PRJNA531988	0.129874	35.2465	chloroplast	NC_041503.1/MH390460.1	82	2019-04-10T00:00:00Z
Selaginella kraussiana	Eukaryota;Plants;Land Plants			PRJNA524583	0.129971	52.334	plastid	NC_040926.1/MH549643.1	74	2019-02-27T00:00:00Z
Macarthuria keigheryi	Eukaryota;Plants;Land Plants			PRJNA524568	0.130003	35.4407	plastid	NC_040952.1/MK397926.1	77	2019-02-27T00:00:00Z
Caragana microphylla	Eukaryota;Plants;Land Plants			PRJNA359961	0.130029	34.2624	chloroplast	NC_032691.1/KX289922.1	76	2017-01-05T00:00:00Z
Wisteria sinensis	Eukaryota;Plants;Land Plants			PRJNA313711	0.130561	34.3962	chloroplast	NC_029406.1/KT200359.1	75	2016-03-01T00:00:00Z
Thuja sutchuenensis	Eukaryota;Plants;Land Plants			PRJNA541683	0.130668	34.3152	chloroplast	NC_042176.1/KY272867.1	83	2019-05-12T00:00:00Z
Eragrostis tenellula	Eukaryota;Plants;Land Plants			PRJNA550754	0.130773	38.3955	chloroplast	NC_042833.1/MK590080.1	78	2019-06-25T00:00:00Z
Erodium texanum	Eukaryota;Plants;Land Plants			PRJNA54043	0.130812	39.54	plastid	NC_014569.1/HM125536.1	78	2010-10-20T00:00:00Z
Areca vestiaria	Eukaryota;Plants;Land Plants			PRJNA319103	0.130917	36.5758	plastid	NC_029972.1/KT312940.1	79	2016-04-20T00:00:00Z
Wisteria floribunda	Eukaryota;Plants;Land Plants			PRJNA291901	0.13096	34.3288	chloroplast	NC_027677.1/KM103376.1	76	2015-08-04T00:00:00Z
Viscum minimum	Eukaryota;Plants;Land Plants			PRJNA295574	0.131016	36.1818	chloroplast	NC_027829.1/KJ512176.1	71	2015-09-14T00:00:00Z
Thuja plicata	Eukaryota;Plants;Land Plants			PRJNA541681	0.131118	34.2981	chloroplast	NC_042175.1/KY290451.1	84	2019-05-12T00:00:00Z
Caragana kozlowii	Eukaryota;Plants;Land Plants			PRJNA394385	0.131274	34.495	chloroplast	NC_035228.1/KX349219.1	76	2017-07-14T00:00:00Z
Corybas taliensis	Eukaryota;Plants;Land Plants			PRJNA609485	0.131393	38.2106	chloroplast	NC_046022.1/MN783368.1	73	2020-03-07T00:00:00Z
Taiwania flousiana	Eukaryota;Plants;Land Plants			PRJNA207634	0.131413	34.7226	chloroplast	NC_021441.1/KC427274.1	83	2013-06-17T00:00:00Z
Sequoiadendron giganteum	Eukaryota;Plants;Land Plants	SEGI21	SAMN11640747	PRJNA541481	0.131478	35.4592	chloroplast	Pltd:CM017437.1	0	2019-07-29T00:00:00Z
Thuja occidentalis	Eukaryota;Plants;Land Plants			PRJNA541597	0.131602	34.2556	chloroplast	NC_042177.1/KY295906.1	83	2019-05-12T00:00:00Z
Dacrydium elatum	Eukaryota;Plants;Land Plants			PRJNA608402	0.131671	37.2481	chloroplast	NC_045880.1/MH979331.1	82	2020-02-24T00:00:00Z
Equisetum hyemale	Eukaryota;Plants;Land Plants			PRJNA186771	0.13176	33.7394	chloroplast	NC_020146.1/KC117177.1	83	2013-01-22T00:00:00Z
Achatocarpus pubescens	Eukaryota;Plants;Land Plants			PRJNA524567	0.131763	35.4128	plastid	NC_040947.1/MK397909.1	78	2019-02-27T00:00:00Z
Cryptomeria japonica	Eukaryota;Plants;Land Plants			PRJNA29221	0.13181	35.3797	chloroplast	NC_010548.1/AP009377.1	82	2008-04-04T00:00:00Z
Achatocarpus nigricans	Eukaryota;Plants;Land Plants			PRJNA524611	0.131863	35.367	plastid	NC_040946.1/MK397908.1	78	2019-02-27T00:00:00Z
Selaginella remotifolia	Eukaryota;Plants;Land Plants			PRJNA532013	0.131867	56.5009	chloroplast	NC_041644.1/MH598535.1	73	2019-04-10T00:00:00Z
Metasequoia glyptostroboides	Eukaryota;Plants;Land Plants			PRJNA287937	0.131887	35.2537	chloroplast	NC_027423.1/KR061358.1	82	2015-06-24T00:00:00Z
Taxodium distichum	Eukaryota;Plants;Land Plants			PRJNA389021	0.131954	35.2615	chloroplast	NC_034941.1/LC177556.1	82	2017-06-02T00:00:00Z
Taxodium mucronatum	Eukaryota;Plants;Land Plants			PRJNA595331	0.132037	35.2507	chloroplast	NC_045277.1/MN535011.1	83	2019-12-12T00:00:00Z
Trifolium repens	Eukaryota;Plants;Land Plants			PRJNA245698	0.13212	34.3029	plastid	NC_024036.1/KC894706.1	75	2014-04-30T00:00:00Z
Glyptostrobus pensilis	Eukaryota;Plants;Land Plants			PRJNA348052	0.132239	35.3043	chloroplast	NC_031354.1/KU302768.1	83	2016-10-13T00:00:00Z
Medicago minima	Eukaryota;Plants;Land Plants			PRJNA550943	0.132296	34.5445	plastid	NC_042849.1/MK460499.1	78	2019-06-25T00:00:00Z
Tribolium hispidum	Eukaryota;Plants;Land Plants			PRJNA430653	0.132449	38.291	chloroplast	NC_036705.1/KY432798.1	85	2018-01-18T00:00:00Z
Taiwania cryptomerioides	Eukaryota;Plants;Land Plants			PRJNA74377	0.132588	34.6253	chloroplast	NC_016065.1/AP012266.1	83	2011-10-17T00:00:00Z
Oryza glaberrima	Eukaryota;Plants;Land Plants			PRJNA251644	0.132629	38.9643	plastid	NC_024175.1/	83	2014-06-09T00:00:00Z
Downingia elegans	Eukaryota;Plants;Land Plants			PRJNA394284	0.132649	40.8582	plastid	NC_035360.1/MF061172.1	74	2017-07-14T00:00:00Z
Enteropogon ramosus	Eukaryota;Plants;Land Plants			PRJNA550936	0.13269	38.333	chloroplast	NC_042834.1/MK590081.1	81	2019-06-25T00:00:00Z
Rytidosperma pallidum	Eukaryota;Plants;Land Plants			PRJNA439057	0.132765	38.294	chloroplast	NC_037166.1/MF460980.1	83	2018-03-23T00:00:00Z
Schismus arabicus	Eukaryota;Plants;Land Plants			PRJNA430596	0.132811	38.164	chloroplast	NC_036703.1/KY432795.1	85	2018-01-18T00:00:00Z
Daphne genkwa	Eukaryota;Plants;Land Plants			PRJNA608359	0.132869	36.3222	chloroplast	NC_045891.1/MN563133.1	71	2020-02-24T00:00:00Z
Tenaxia guillarmodiae	Eukaryota;Plants;Land Plants			PRJNA318182	0.132895	38.2452	plastid	NC_029897.1/KT168397.1	85	2016-04-12T00:00:00Z
Caragana rosea var. rosea	Eukaryota;Plants;Land Plants			PRJNA508168	0.133122	34.8395	chloroplast	NC_039932.1/MF593790.1	77	2018-12-03T00:00:00Z
Festuca ovina	Eukaryota;Plants;Land Plants			PRJNA182704	0.133165	38.3727	plastid	NC_019649.1/JX871940.1	86	2012-12-03T00:00:00Z
Enneapogon caerulescens	Eukaryota;Plants;Land Plants			PRJNA550756	0.133231	38.3447	chloroplast	NC_042837.1/MK590084.1	81	2019-06-25T00:00:00Z
Podocarpus totara	Eukaryota;Plants;Land Plants			PRJNA190133	0.133259	37.1607	chloroplast	NC_020361.1/KC306742.1	75	2013-02-28T00:00:00Z
Retrophyllum piresii	Eukaryota;Plants;Land Plants			PRJNA261184	0.133291	37.2568	chloroplast	NC_024827.1/KJ617081.1	82	2014-10-07T00:00:00Z
Equisetum arvense	Eukaryota;Plants;Land Plants			PRJNA60343	0.133309	33.3616	chloroplast	NC_014699.1/GU191334.1	84	2010-12-02T00:00:00Z
Phaenanthoecium koestlinii	Eukaryota;Plants;Land Plants			PRJNA399984	0.133327	38.4206	chloroplast	NC_035533.1/MF035993.1	83	2017-08-24T00:00:00Z
Enneapogon oblongus	Eukaryota;Plants;Land Plants			PRJNA430643	0.133433	38.3353	chloroplast	NC_036682.1/KY432811.1	85	2018-01-18T00:00:00Z
Leersia perrieri	Eukaryota;Plants;Land Plants			PRJNA563379	0.133538	38.9432	chloroplast	NC_044486.1/MF508719.1	82	2019-09-06T00:00:00Z
Passiflora menispermifolia	Eukaryota;Plants;Land Plants			PRJNA553888	0.133682	36.2973	chloroplast	NC_043826.1/MK694933.1	76	2019-07-22T00:00:00Z
Nageia nagi	Eukaryota;Plants;Land Plants			PRJNA232191	0.133722	37.2646	chloroplast	NC_023120.1/AB830885.1	81	2013-12-20T00:00:00Z
Fargesia denudata	Eukaryota;Plants;Land Plants			PRJNA387796	0.13373	39.6852	chloroplast	NC_034747.1/KX904877.1	81	2017-05-24T00:00:00Z
Podocarpus lambertii	Eukaryota;Plants;Land Plants			PRJNA241234	0.133734	37.1147	chloroplast	NC_023805.1/KJ010812.1	82	2014-03-20T00:00:00Z
Bouteloua gracilis	Eukaryota;Plants;Land Plants			PRJNA318184	0.133742	38.2468	plastid	NC_029892.1/KT168392.1	85	2016-04-12T00:00:00Z
Castellia tuberculosa	Eukaryota;Plants;Land Plants			PRJNA550780	0.133798	38.4012	plastid	NC_042703.1/MH569077.1	83	2019-06-25T00:00:00Z
Dacrycarpus imbricatus	Eukaryota;Plants;Land Plants			PRJNA389054	0.133811	37.2316	chloroplast	NC_034942.1/LC177621.1	82	2017-06-02T00:00:00Z
Sequoia sempervirens	Eukaryota;Plants;Land Plants	SESE104	SAMN11654426	PRJNA542879	0.133816	35.365	chloroplast	Pltd:CM017438.1	0	2019-07-29T00:00:00Z
Tripogonella loliiformis	Eukaryota;Plants;Land Plants			PRJNA550697	0.133837	38.4557	chloroplast	NC_042840.1/MK590087.1	81	2019-06-25T00:00:00Z
Bouteloua curtipendula	Eukaryota;Plants;Land Plants			PRJNA313688	0.133865	38.2281	plastid	NC_029414.1/KT168386.1	85	2016-03-01T00:00:00Z
Oropetium aristatum	Eukaryota;Plants;Land Plants			PRJNA430641	0.13388	38.477	chloroplast	NC_036697.1/KY432789.1	85	2018-01-18T00:00:00Z
Cortaderia selloana	Eukaryota;Plants;Land Plants			PRJNA430594	0.133885	38.5286	plastid	NC_036681.1/KY432810.1	85	2018-01-18T00:00:00Z
Sequoia sempervirens	Eukaryota;Plants;Land Plants			PRJNA325979	0.133929	35.3658	chloroplast	NC_030372.1/KR075871.1	75	2016-06-17T00:00:00Z
Orinus kokonoricus	Eukaryota;Plants;Land Plants			PRJNA550937	0.133953	38.2268	chloroplast	NC_042859.1/MK622399.1	85	2019-06-25T00:00:00Z
Hakonechloa macra	Eukaryota;Plants;Land Plants			PRJNA262808	0.13396	38.6518	plastid	NC_025235.1/KJ920232.1	81	2014-10-04T00:00:00Z
Desmazeria sicula	Eukaryota;Plants;Land Plants			PRJNA550886	0.133982	38.3417	plastid	NC_042704.1/MH569079.1	83	2019-06-25T00:00:00Z
Podocarpus latifolius	Eukaryota;Plants;Land Plants			PRJNA541639	0.13402	37.1907	chloroplast	NC_042224.1/MH536745.1	82	2019-05-12T00:00:00Z
Leersia japonica	Eukaryota;Plants;Land Plants			PRJNA387766	0.134074	38.9151	chloroplast	NC_034766.1/KF359922.1	87	2017-05-24T00:00:00Z
Danthonia californica	Eukaryota;Plants;Land Plants			PRJNA262799	0.134191	38.4459	plastid	NC_025232.1/KJ920229.1	85	2014-10-04T00:00:00Z
Arrhenatherum elatius	Eukaryota;Plants;Land Plants			PRJNA550909	0.134242	38.3829	plastid	NC_042673.1/MH569076.1	82	2019-06-25T00:00:00Z
Oryzopsis asperifolia	Eukaryota;Plants;Land Plants			PRJNA289841	0.134281	38.7739	plastid	NC_027479.1/KM974744.1	84	2015-07-14T00:00:00Z
Trichoneura grandiglumis	Eukaryota;Plants;Land Plants			PRJNA430568	0.134286	38.2311	chloroplast	NC_036707.1/KY432800.1	85	2018-01-18T00:00:00Z
Cynodon dactylon	Eukaryota;Plants;Land Plants			PRJNA387862	0.134297	38.3754	chloroplast	NC_034680.1/KY024482.1	83	2017-06-01T00:00:00Z
Cephalotaxus oliveri	Eukaryota;Plants;Land Plants			PRJNA198672	0.134337	35.2509	chloroplast	NC_021110.1/KC136217.1	82	2013-05-17T00:00:00Z
Catapodium rigidum	Eukaryota;Plants;Land Plants			PRJNA430628	0.134338	38.2208	chloroplast	NC_036711.1/KY432804.1	83	2018-01-18T00:00:00Z
Catapodium marinum	Eukaryota;Plants;Land Plants			PRJNA546313	0.134366	38.2165	plastid	NC_042403.1/MH569078.1	83	2019-06-06T00:00:00Z
Drosera erythrorhiza	Eukaryota;Plants;Land Plants			PRJNA394421	0.134393	37.7609	plastid	NC_035241.1/KY651214.1	84	2017-07-14T00:00:00Z
Porterella carnosula	Eukaryota;Plants;Land Plants			PRJNA362376	0.134401	40.9484	plastid	NC_033376.1/KY354228.1	73	2017-01-18T00:00:00Z
Monsonia marlothii	Eukaryota;Plants;Land Plants			PRJNA317891	0.134416	39.3034	chloroplast	NC_029830.1/KT692739.1	75	2016-04-09T00:00:00Z
Triodia longiceps	Eukaryota;Plants;Land Plants			PRJNA550675	0.134425	38.417	chloroplast	NC_042864.1/MK622404.1	85	2019-06-25T00:00:00Z
Eragrostis tef	Eukaryota;Plants;Land Plants			PRJNA313689	0.134435	38.3137	plastid	NC_029413.1/KT168385.1	85	2016-03-01T00:00:00Z
Eriachne burkittii	Eukaryota;Plants;Land Plants			PRJNA532010	0.134456	38.626	chloroplast	NC_041562.1/MH036242.1	83	2019-04-10T00:00:00Z
Nematopoa longipes	Eukaryota;Plants;Land Plants			PRJNA399985	0.134459	38.2659	chloroplast	NC_035532.1/MF035992.1	83	2017-08-24T00:00:00Z
Oryza sativa f. spontanea SL10	Eukaryota;Plants;Land Plants			PRJNA12441	0.134494	39.0084	chloroplast	NC_005973.1/AP006728.1	119	2004-07-12T00:00:00Z
Oryza sativa Indica Group	Eukaryota;Plants;Land Plants			PRJNA17293	0.134496	38.9989	chloroplast	NC_008155.1/AY522329.1	64	2006-06-16T00:00:00Z
Leptochloa virgata	Eukaryota;Plants;Land Plants			PRJNA430676	0.1345	38.4312	chloroplast	NC_036692.1/KY432784.1	83	2018-01-18T00:00:00Z
Oryza sativa	Eukaryota;Plants;Land Plants			PRJNA291900	0.134502	38.9979	chloroplast	NC_031333.1/KM103369.1	100	2016-10-05T00:00:00Z
Leptochloa pluriflora	Eukaryota;Plants;Land Plants			PRJNA439051	0.134507	38.4255	chloroplast	NC_037169.1/MF460983.1	85	2018-03-23T00:00:00Z
Eriachne pauciflora	Eukaryota;Plants;Land Plants			PRJNA532087	0.134519	38.6369	chloroplast	NC_041570.1/MH036268.1	83	2019-04-10T00:00:00Z
Panicum capillare	Eukaryota;Plants;Land Plants			PRJNA328836	0.13452	38.5088	chloroplast	NC_030493.1/KU291475.1	83	2016-07-13T00:00:00Z
Oryza sativa Japonica Group	Eukaryota;Plants;Land Plants			PRJNA122	0.134525	38.9861	plastid	Pltd:NC_001320.1/	108	1989-11-23T00:00:00Z
Oryza rufipogon	Eukaryota;Plants;Land Plants			PRJNA162601	0.134544	39.0029	chloroplast	NC_017835.1/JN005832.1	77	2012-05-09T00:00:00Z
Triticum aestivum	Eukaryota;Plants;Land Plants			PRJNA17591	0.134545	38.3143	chloroplast	NC_002762.1/AB042240.3	83	2000-11-07T00:00:00Z
Oryza sativa Indica Group	Eukaryota;Plants;Land Plants		SAMN04866660	PRJNA318714	0.134546	39.0008	chloroplast	Pltd:CP018170.1	0	2017-05-04T00:00:00Z
Oryza meridionalis	Eukaryota;Plants;Land Plants			PRJNA86637	0.134558	39.0085	chloroplast	NC_016927.1/JN005831.1	75	2012-02-28T00:00:00Z
Chloris virgata	Eukaryota;Plants;Land Plants			PRJNA356511	0.134561	38.286	chloroplast	NC_032034.1/KX765279.1	85	2016-12-07T00:00:00Z
Centropodia glauca	Eukaryota;Plants;Land Plants			PRJNA313678	0.134565	38.4246	plastid	NC_029411.1/KT168383.1	85	2016-03-01T00:00:00Z
Oryza longistaminata	Eukaryota;Plants;Land Plants			PRJNA289799	0.134567	38.9895	chloroplast	NC_027462.1/KM881641.1	83	2015-07-14T00:00:00Z
Triraphis mollis	Eukaryota;Plants;Land Plants			PRJNA550707	0.134579	38.3567	chloroplast	NC_042835.1/MK590082.1	81	2019-06-25T00:00:00Z
Oryza glumipatula	Eukaryota;Plants;Land Plants			PRJNA289804	0.134583	38.9886	chloroplast	NC_027461.1/KM881640.1	83	2015-07-14T00:00:00Z
Oryza brachyantha	Eukaryota;Plants;Land Plants			PRJNA328726	0.134604	38.981	chloroplast	NC_030596.1/KT992850.1	83	2016-07-12T00:00:00Z
Oryza punctata	Eukaryota;Plants;Land Plants			PRJNA291899	0.134604	38.9743	chloroplast	NC_027676.1/KM103375.1	100	2015-08-04T00:00:00Z
Oryza barthii	Eukaryota;Plants;Land Plants			PRJNA289787	0.134674	38.9897	chloroplast	NC_027460.1/KM881634.1	82	2015-07-14T00:00:00Z
Eriachne sulcata	Eukaryota;Plants;Land Plants			PRJNA532062	0.134681	38.6083	chloroplast	NC_041573.1/MH036281.1	83	2019-04-10T00:00:00Z
Eriachne obtusa	Eukaryota;Plants;Land Plants			PRJNA532064	0.134708	38.674	chloroplast	NC_041568.1/MH036258.1	83	2019-04-10T00:00:00Z
Melica mutica	Eukaryota;Plants;Land Plants			PRJNA289776	0.13471	38.4975	plastid	NC_027477.1/KM974742.1	83	2015-07-14T00:00:00Z
Eriachne triseta	Eukaryota;Plants;Land Plants			PRJNA528054	0.134714	38.5892	chloroplast	NC_041249.1/MH036286.1	83	2019-03-26T00:00:00Z
Eriachne semiciliata	Eukaryota;Plants;Land Plants			PRJNA532085	0.134721	38.6198	chloroplast	NC_041572.1/MH036277.1	83	2019-04-10T00:00:00Z
Eriachne schultziana	Eukaryota;Plants;Land Plants			PRJNA532086	0.134722	38.6225	chloroplast	NC_041571.1/MH036272.1	83	2019-04-10T00:00:00Z
Limnopoa meeboldii	Eukaryota;Plants;Land Plants			PRJNA399986	0.134724	38.3258	chloroplast	NC_035531.1/MF035987.1	83	2017-08-24T00:00:00Z
Dactylis glomerata	Eukaryota;Plants;Land Plants			PRJNA289846	0.134737	38.4304	plastid	NC_027473.1/KM974738.1	84	2015-07-14T00:00:00Z
Eriachne stipacea	Eukaryota;Plants;Land Plants			PRJNA262790	0.134746	38.6015	plastid	NC_025234.1/KJ920231.1	83	2014-10-04T00:00:00Z
Eriachne major	Eukaryota;Plants;Land Plants			PRJNA532088	0.134748	38.6655	chloroplast	NC_041566.1/MH036251.1	83	2019-04-10T00:00:00Z
Oryza coarctata	Eukaryota;Plants;Land Plants			PRJNA435368	0.13475	38.9967	chloroplast	NC_036934.1/MG383937.1	82	2018-02-22T00:00:00Z
Eriachne triodioides	Eukaryota;Plants;Land Plants			PRJNA532048	0.134765	38.599	chloroplast	NC_041574.1/MH036282.1	83	2019-04-10T00:00:00Z
Melica subulata	Eukaryota;Plants;Land Plants			PRJNA289774	0.134765	38.5018	plastid	NC_027478.1/KM974743.1	83	2015-07-14T00:00:00Z
Eriachne ciliata	Eukaryota;Plants;Land Plants			PRJNA531989	0.134786	38.6056	chloroplast	NC_041563.1/MH036243.1	83	2019-04-10T00:00:00Z
Oryza rhizomatis	Eukaryota;Plants;Land Plants			PRJNA387890	0.134796	39.0101	chloroplast	NC_034758.1/KF359911.1	87	2017-05-24T00:00:00Z
Cynosurus cristatus	Eukaryota;Plants;Land Plants			PRJNA430627	0.134799	38.2577	chloroplast	NC_036713.1/KY432806.1	83	2018-01-18T00:00:00Z
Eriachne aristidea	Eukaryota;Plants;Land Plants			PRJNA532002	0.134808	38.5934	chloroplast	NC_041558.1/MH036234.1	83	2019-04-10T00:00:00Z
Oryza eichingeri	Eukaryota;Plants;Land Plants			PRJNA387861	0.134821	39.0021	chloroplast	NC_034759.1/KF359912.1	87	2017-05-24T00:00:00Z
Hilaria cenchroides	Eukaryota;Plants;Land Plants			PRJNA313677	0.134824	38.3248	plastid	NC_029415.1/KT168387.1	85	2016-03-01T00:00:00Z
Eriachne glauca	Eukaryota;Plants;Land Plants			PRJNA531967	0.13483	38.5871	chloroplast	NC_041565.1/MH036247.1	83	2019-04-10T00:00:00Z
Eriachne tenuiculmis	Eukaryota;Plants;Land Plants			PRJNA550753	0.13485	38.6096	chloroplast	NC_042831.1/MK590078.1	81	2019-06-25T00:00:00Z
Lamarckia aurea	Eukaryota;Plants;Land Plants			PRJNA439141	0.134854	38.4445	chloroplast	NC_037168.1/MF460982.1	84	2018-03-23T00:00:00Z
Eriachne avenacea	Eukaryota;Plants;Land Plants			PRJNA532091	0.134857	38.6217	chloroplast	NC_041559.1/MH036238.1	83	2019-04-10T00:00:00Z
Eriachne armittii	Eukaryota;Plants;Land Plants			PRJNA387776	0.134864	38.5863	chloroplast	NC_034791.1/KX229726.1	83	2017-05-24T00:00:00Z
Triodia stipoides	Eukaryota;Plants;Land Plants			PRJNA439147	0.134874	38.427	chloroplast	NC_037157.1/MF460970.1	85	2018-03-23T00:00:00Z
Melanocenchris abyssinica	Eukaryota;Plants;Land Plants			PRJNA430660	0.134878	38.2842	chloroplast	NC_036694.1/KY432786.1	83	2018-01-18T00:00:00Z
Eriachne compacta	Eukaryota;Plants;Land Plants			PRJNA532089	0.134882	38.5255	chloroplast	NC_041564.1/MH036246.1	83	2019-04-10T00:00:00Z
Dactyloctenium aegyptium	Eukaryota;Plants;Land Plants			PRJNA430620	0.134889	38.3997	chloroplast	NC_036714.1/KY432807.1	85	2018-01-18T00:00:00Z
Vaseyochloa multinervosa	Eukaryota;Plants;Land Plants			PRJNA430661	0.134891	38.4607	chloroplast	NC_036710.1/KY432803.1	85	2018-01-18T00:00:00Z
Eriachne melicacea	Eukaryota;Plants;Land Plants			PRJNA532053	0.134911	38.6114	chloroplast	NC_041567.1/MH036253.1	83	2019-04-10T00:00:00Z
Oryza officinalis	Eukaryota;Plants;Land Plants			PRJNA289798	0.134911	38.9983	chloroplast	NC_027463.1/KM881643.1	83	2015-07-14T00:00:00Z
Eriachne agrostidea	Eukaryota;Plants;Land Plants			PRJNA532092	0.134919	38.6069	chloroplast	NC_041557.1/MH036233.1	83	2019-04-10T00:00:00Z
Eragrostis setifolia	Eukaryota;Plants;Land Plants			PRJNA550755	0.134928	38.3064	chloroplast	NC_042832.1/MK590079.1	81	2019-06-25T00:00:00Z
Eriachne basedowii	Eukaryota;Plants;Land Plants			PRJNA532063	0.134933	38.6836	chloroplast	NC_041561.1/MH036241.1	83	2019-04-10T00:00:00Z
Tragus australianus	Eukaryota;Plants;Land Plants			PRJNA550710	0.134935	38.2577	chloroplast	NC_042830.1/MK590077.1	81	2019-06-25T00:00:00Z
Eriachne pallescens	Eukaryota;Plants;Land Plants			PRJNA532001	0.134949	38.5716	chloroplast	NC_041569.1/MH036267.1	83	2019-04-10T00:00:00Z
Triodia wiseana	Eukaryota;Plants;Land Plants			PRJNA439144	0.134962	38.3715	chloroplast	NC_037161.1/MF460975.1	85	2018-03-23T00:00:00Z
Oxychloris scariosa	Eukaryota;Plants;Land Plants			PRJNA439125	0.134963	38.3661	chloroplast	NC_037158.1/MF460971.1	85	2018-03-23T00:00:00Z
Helictochloa hookeri	Eukaryota;Plants;Land Plants			PRJNA289855	0.134975	38.3167	plastid	NC_027469.1/KM974734.1	83	2015-07-14T00:00:00Z
Pheidochloa gracilis	Eukaryota;Plants;Land Plants			PRJNA399976	0.134979	38.5779	chloroplast	NC_035534.1/MF035994.1	83	2017-08-24T00:00:00Z
Heteropogon contortus	Eukaryota;Plants;Land Plants			PRJNA390371	0.134982	38.4222	chloroplast	NC_035027.1/KY596145.1	83	2017-06-13T00:00:00Z
Connorochloa tenuis	Eukaryota;Plants;Land Plants			PRJNA439142	0.134985	38.3346	chloroplast	NC_037165.1/MF460979.1	84	2018-03-23T00:00:00Z
Thinopyrum bessarabicum	Eukaryota;Plants;Land Plants			PRJNA553894	0.135003	38.3399	chloroplast	NC_043837.1/MH331639.1	84	2019-07-22T00:00:00Z
Triodia schinzii	Eukaryota;Plants;Land Plants			PRJNA550679	0.135016	38.3266	chloroplast	NC_042870.1/MK622410.1	85	2019-06-25T00:00:00Z
Thinopyrum elongatum	Eukaryota;Plants;Land Plants			PRJNA553896	0.13502	38.2773	chloroplast	NC_043841.1/MH331643.1	84	2019-07-22T00:00:00Z
Eragrostis minor	Eukaryota;Plants;Land Plants			PRJNA313687	0.135023	38.2402	plastid	NC_029412.1/KT168384.1	85	2016-03-01T00:00:00Z
Coelachne africana	Eukaryota;Plants;Land Plants			PRJNA400939	0.135041	38.2691	chloroplast	NC_035732.1/MF035974.1	82	2017-08-31T00:00:00Z
Dactyloctenium radulans	Eukaryota;Plants;Land Plants			PRJNA550819	0.13505	38.388	chloroplast	NC_042838.1/MK590085.1	81	2019-06-25T00:00:00Z
Eustachys glauca	Eukaryota;Plants;Land Plants			PRJNA430656	0.135053	38.2998	chloroplast	NC_036685.1/KY432777.1	85	2018-01-18T00:00:00Z
Eriachne axillaris	Eukaryota;Plants;Land Plants			PRJNA532090	0.135073	38.5999	chloroplast	NC_041560.1/MH036240.1	83	2019-04-10T00:00:00Z
Oryza minuta	Eukaryota;Plants;Land Plants			PRJNA325260	0.135094	38.9647	chloroplast	NC_030298.1/KU179220.1	89	2016-06-10T00:00:00Z
Sporobolus heterolepis	Eukaryota;Plants;Land Plants			PRJNA313686	0.135097	38.3576	plastid	NC_029417.1/KT168389.1	85	2016-03-01T00:00:00Z
Eriachne mucronata	Eukaryota;Plants;Land Plants			PRJNA399975	0.135115	38.6056	chloroplast	NC_035529.1/MF035983.1	83	2017-08-24T00:00:00Z
Urochondra setulosa	Eukaryota;Plants;Land Plants			PRJNA541609	0.135134	38.4929	chloroplast	NC_042238.1/MH488957.1	88	2019-05-12T00:00:00Z
Ehrharta bulbosa	Eukaryota;Plants;Land Plants			PRJNA430642	0.135137	38.7155	chloroplast	NC_036715.1/KY432808.1	83	2018-01-18T00:00:00Z
Oryza grandiglumis	Eukaryota;Plants;Land Plants			PRJNA387860	0.13515	38.9937	chloroplast	NC_034761.1/KF359914.1	87	2017-05-24T00:00:00Z
Eleusine indica	Eukaryota;Plants;Land Plants			PRJNA328747	0.135151	38.1921	chloroplast	NC_030486.1/KU833246.1	83	2016-07-12T00:00:00Z
Lolium multiflorum	Eukaryota;Plants;Land Plants			PRJNA182880	0.135175	38.2549	plastid	NC_019651.1/JX871942.1	86	2012-12-04T00:00:00Z
Oryza alta	Eukaryota;Plants;Land Plants			PRJNA387897	0.135175	38.9961	chloroplast	NC_034760.1/KF359913.1	87	2017-05-24T00:00:00Z
Oryza latifolia	Eukaryota;Plants;Land Plants			PRJNA387768	0.13519	38.9933	chloroplast	NC_034762.1/KF359915.1	87	2017-05-24T00:00:00Z
Brachypodium distachyon	Eukaryota;Plants;Land Plants	Bd21		PRJNA74771	0.135199	38.5698	chloroplast	Pltd:NC_011032.1/	81	2008-07-10T00:00:00Z
Poa trivialis	Eukaryota;Plants;Land Plants			PRJNA435299	0.135208	38.2914	plastid	NC_036975.1/KY562593.1	87	2018-02-22T00:00:00Z
Triodia concinna	Eukaryota;Plants;Land Plants			PRJNA550809	0.135218	38.4793	chloroplast	NC_042862.1/MK622402.1	85	2019-06-25T00:00:00Z
Oryza australiensis	Eukaryota;Plants;Land Plants			PRJNA256411	0.135224	38.9487	chloroplast	NC_024608.1/KJ830774.1	83	2014-07-29T00:00:00Z
Dichaetaria wightii	Eukaryota;Plants;Land Plants			PRJNA399987	0.135248	38.7008	chloroplast	NC_035525.1/MF035978.1	83	2017-08-24T00:00:00Z
Triodia glabra	Eukaryota;Plants;Land Plants			PRJNA550799	0.135251	38.4374	chloroplast	NC_042863.1/MK622403.1	85	2019-06-25T00:00:00Z
Triodia mallota	Eukaryota;Plants;Land Plants			PRJNA550792	0.135261	38.4472	chloroplast	NC_042865.1/MK622405.1	85	2019-06-25T00:00:00Z
Festuca altissima	Eukaryota;Plants;Land Plants			PRJNA182879	0.135272	38.4485	plastid	NC_019648.1/JX871939.1	86	2012-12-04T00:00:00Z
Triodia basedowii	Eukaryota;Plants;Land Plants			PRJNA550709	0.135278	38.4298	chloroplast	NC_042860.1/MK622400.1	85	2019-06-25T00:00:00Z
Lolium perenne	Eukaryota;Plants;Land Plants			PRJNA27769	0.135282	38.2475	chloroplast	NC_009950.1/AM777385.2	84	2007-10-30T00:00:00Z
Triodia chichesterensis	Eukaryota;Plants;Land Plants			PRJNA550873	0.135284	38.4428	chloroplast	NC_042861.1/MK622401.1	85	2019-06-25T00:00:00Z
Festuca pratensis	Eukaryota;Plants;Land Plants			PRJNA182881	0.135291	38.2679	plastid	NC_019650.1/JX871941.1	86	2012-12-04T00:00:00Z
Triodia scintillans	Eukaryota;Plants;Land Plants			PRJNA550797	0.135301	38.4277	chloroplast	NC_042871.1/MK622411.1	85	2019-06-25T00:00:00Z
Kewa sp. GY-2019	Eukaryota;Plants;Land Plants			PRJNA524569	0.135316	37.0895	plastid	NC_040950.1/MK397923.1	77	2019-02-27T00:00:00Z
Hilaria rigida	Eukaryota;Plants;Land Plants			PRJNA318190	0.135318	38.3171	plastid	NC_029896.1/KT168396.1	83	2016-04-12T00:00:00Z
Triodia vanleeuwenii	Eukaryota;Plants;Land Plants			PRJNA550798	0.135318	38.4347	chloroplast	NC_042869.1/MK622409.1	85	2019-06-25T00:00:00Z
Uniola paniculata	Eukaryota;Plants;Land Plants			PRJNA430567	0.135322	38.3108	chloroplast	NC_036709.1/KY432802.1	83	2018-01-18T00:00:00Z
Guadua weberbaueri	Eukaryota;Plants;Land Plants			PRJNA283093	0.135324	38.7544	plastid	NC_026991.1/KP793062.1	81	2015-05-05T00:00:00Z
Guadua angustifolia	Eukaryota;Plants;Land Plants			PRJNA316279	0.135331	38.7324	chloroplast	NC_029749.1/KM365071.1	85	2016-03-28T00:00:00Z
Cunninghamia lanceolata	Eukaryota;Plants;Land Plants			PRJNA207576	0.135334	35.0016	chloroplast	NC_021437.1/KC427270.1	81	2013-06-17T00:00:00Z
Deschampsia cespitosa	Eukaryota;Plants;Land Plants			PRJNA524550	0.13534	38.2828	plastid	NC_040999.1/MK262782.1	86	2019-02-27T00:00:00Z
Puccinellia nuttalliana	Eukaryota;Plants;Land Plants			PRJNA289775	0.135353	38.3324	plastid	NC_027485.1/KM974750.1	84	2015-07-14T00:00:00Z
Deschampsia antarctica	Eukaryota;Plants;Land Plants			PRJNA239687	0.135362	38.3158	plastid	NC_023533.1/KF887484.1	86	2014-02-28T00:00:00Z
Lithachne pauciflora	Eukaryota;Plants;Land Plants			PRJNA283089	0.135362	38.6194	plastid	NC_026970.1/KJ871002.1	80	2015-05-05T00:00:00Z
Poa interior	Eukaryota;Plants;Land Plants			PRJNA550853	0.135362	38.3165	plastid	NC_042707.1/MH569085.1	83	2019-06-25T00:00:00Z
Neyraudia reynaudiana	Eukaryota;Plants;Land Plants			PRJNA252494	0.135367	38.3587	chloroplast	NC_024262.1/KF356392.1	85	2014-06-11T00:00:00Z
Chloris barbata	Eukaryota;Plants;Land Plants			PRJNA318189	0.135372	38.2575	plastid	NC_029893.1/KT168393.1	85	2016-04-12T00:00:00Z
Triodia tomentosa	Eukaryota;Plants;Land Plants			PRJNA550678	0.135375	38.4657	chloroplast	NC_042868.1/MK622408.1	85	2019-06-25T00:00:00Z
Triodia plurinervata	Eukaryota;Plants;Land Plants			PRJNA550808	0.135386	38.4545	chloroplast	NC_042866.1/MK622406.1	85	2019-06-25T00:00:00Z
Guadua chacoensis	Eukaryota;Plants;Land Plants			PRJNA311779	0.135403	38.7584	chloroplast	NC_029232.1/KT373814.1	85	2016-02-12T00:00:00Z
Sporobolus helvolus	Eukaryota;Plants;Land Plants			PRJNA541678	0.13541	38.3664	chloroplast	NC_042237.1/MH392303.1	87	2019-05-12T00:00:00Z
Australopyrum retrofractum	Eukaryota;Plants;Land Plants			PRJNA553895	0.135417	38.38	chloroplast	NC_043840.1/MH331642.1	83	2019-07-22T00:00:00Z
Poa palustris	Eukaryota;Plants;Land Plants			PRJNA289771	0.135446	38.2987	plastid	NC_027484.1/KM974749.1	84	2015-07-14T00:00:00Z
Distichlis bajaensis	Eukaryota;Plants;Land Plants			PRJNA318188	0.135452	38.1737	plastid	NC_029894.1/KT168394.1	82	2016-04-12T00:00:00Z
Triodia lanigera	Eukaryota;Plants;Land Plants			PRJNA550676	0.135453	38.4192	chloroplast	NC_042872.1/MK622413.1	85	2019-06-25T00:00:00Z
Nephelochloa orientalis	Eukaryota;Plants;Land Plants			PRJNA546311	0.135468	38.2511	plastid	NC_042405.1/MH569084.1	83	2019-06-06T00:00:00Z
Zingeria biebersteiniana	Eukaryota;Plants;Land Plants			PRJNA439088	0.135493	38.3023	chloroplast	NC_037170.1/MF460984.1	84	2018-03-23T00:00:00Z
Setaria italica	Eukaryota;Plants;Land Plants	Yugu1		PRJNA207554	0.135516	38.8655	plastid	Pltd:NC_022850.1/	83	2013-11-19T00:00:00Z
Aeluropus lagopoides	Eukaryota;Plants;Land Plants			PRJNA550852	0.135518	38.2244	chloroplast	NC_042858.1/MK622397.1	85	2019-06-25T00:00:00Z
Nardus stricta	Eukaryota;Plants;Land Plants			PRJNA430614	0.135523	38.4252	chloroplast	NC_036695.1/KY432787.1	84	2018-01-18T00:00:00Z
Trisetum cernuum	Eukaryota;Plants;Land Plants			PRJNA289854	0.135539	38.4981	plastid	NC_027487.1/KM974753.1	84	2015-07-14T00:00:00Z
Anthoxanthum odoratum	Eukaryota;Plants;Land Plants			PRJNA289768	0.135551	38.2446	plastid	NC_027467.1/KM974732.1	83	2015-07-14T00:00:00Z
Avena clauda	Eukaryota;Plants;Land Plants			PRJNA557971	0.135557	38.4318	chloroplast	NC_044167.1/	84	2019-08-02T00:00:00Z
Avena eriantha	Eukaryota;Plants;Land Plants			PRJNA557986	0.13556	38.4324	chloroplast	NC_044157.1/	84	2019-08-02T00:00:00Z
Phleum alpinum	Eukaryota;Plants;Land Plants			PRJNA289842	0.135568	38.3918	plastid	NC_027482.1/KM974747.1	84	2015-07-14T00:00:00Z
Chloris truncata	Eukaryota;Plants;Land Plants			PRJNA356523	0.135584	38.2582	chloroplast	NC_032033.1/KX765278.1	85	2016-12-07T00:00:00Z
Sporobolus maritimus	Eukaryota;Plants;Land Plants			PRJNA291239	0.135592	38.4565	chloroplast	NC_027650.1/KP176438.1	83	2015-07-28T00:00:00Z
Sporobolus michauxianus	Eukaryota;Plants;Land Plants			PRJNA313674	0.135617	38.4428	plastid	NC_029416.1/KT168388.1	85	2016-03-01T00:00:00Z
Amphipogon turbinatus	Eukaryota;Plants;Land Plants			PRJNA400040	0.135638	38.6721	chloroplast	NC_035521.1/MF035970.1	83	2017-08-24T00:00:00Z
Oryza longiglumis	Eukaryota;Plants;Land Plants			PRJNA387852	0.135641	38.93	chloroplast	NC_034763.1/KF359918.1	87	2017-05-24T00:00:00Z
Kengyilia melanthera	Eukaryota;Plants;Land Plants			PRJNA550680	0.135642	38.3148	plastid	NC_042706.1/MH569082.1	82	2019-06-25T00:00:00Z
Cephalotaxus sinensis	Eukaryota;Plants;Land Plants			PRJNA439079	0.135646	35.1046	chloroplast	NC_037245.1/MG385662.1	82	2018-03-23T00:00:00Z
Poa annua	Eukaryota;Plants;Land Plants			PRJNA435297	0.135653	38.2152	plastid	NC_036973.1/KY562591.1	87	2018-02-22T00:00:00Z
Triodia rigidissima	Eukaryota;Plants;Land Plants			PRJNA550708	0.135657	38.4116	chloroplast	NC_042867.1/MK622407.1	85	2019-06-25T00:00:00Z
Holcus lanatus	Eukaryota;Plants;Land Plants			PRJNA430616	0.135668	38.407	chloroplast	NC_036689.1/KY432781.1	84	2018-01-18T00:00:00Z
Avena ventricosa	Eukaryota;Plants;Land Plants			PRJNA557985	0.135681	38.4099	chloroplast	NC_044165.1/	84	2019-08-02T00:00:00Z
Chionochloa macra	Eukaryota;Plants;Land Plants			PRJNA262801	0.13572	38.4041	plastid	NC_025230.1/KJ920227.1	85	2014-10-04T00:00:00Z
Avena longiglumis	Eukaryota;Plants;Land Plants			PRJNA557939	0.135728	38.5271	chloroplast	NC_044169.1/	84	2019-08-02T00:00:00Z
Oryza ridleyi	Eukaryota;Plants;Land Plants			PRJNA387853	0.135731	38.9174	chloroplast	NC_034764.1/KF359919.1	87	2017-05-24T00:00:00Z
Astrebla pectinata	Eukaryota;Plants;Land Plants			PRJNA318180	0.135737	38.3285	plastid	NC_029891.1/KT168391.1	85	2016-04-12T00:00:00Z
Raddia brasiliensis	Eukaryota;Plants;Land Plants			PRJNA283091	0.135739	38.8488	plastid	NC_026966.1/KJ870998.1	84	2015-05-05T00:00:00Z
Phalaris arundinacea	Eukaryota;Plants;Land Plants			PRJNA289765	0.135753	38.5266	plastid	NC_027481.1/KM974746.1	83	2015-07-14T00:00:00Z
Isachne distichophylla	Eukaryota;Plants;Land Plants			PRJNA262811	0.135782	38.4602	plastid	NC_025236.1/KJ920233.1	83	2014-10-04T00:00:00Z
Gaudinopsis macra	Eukaryota;Plants;Land Plants			PRJNA550893	0.135784	38.2755	plastid	NC_042711.1/MH569089.1	83	2019-06-25T00:00:00Z
Astrebla lappacea	Eukaryota;Plants;Land Plants			PRJNA550956	0.135801	38.3311	chloroplast	NC_042839.1/MK590086.1	81	2019-06-25T00:00:00Z
Halopyrum mucronatum	Eukaryota;Plants;Land Plants			PRJNA430669	0.135815	38.4427	chloroplast	NC_036688.1/KY432780.1	85	2018-01-18T00:00:00Z
Triticum turgidum	Eukaryota;Plants;Land Plants			PRJNA261042	0.135835	38.3266	chloroplast	NC_024814.1/KJ614397.1	82	2014-10-22T00:00:00Z
Manoao colensoi	Eukaryota;Plants;Land Plants			PRJNA574365	0.135838	36.5428	chloroplast	NC_044893.1/MN016935.1	82	2019-09-26T00:00:00Z
Poa nemoralis	Eukaryota;Plants;Land Plants			PRJNA435323	0.135845	38.3076	plastid	NC_036974.1/KY562592.1	87	2018-02-22T00:00:00Z
Zoysia macrantha	Eukaryota;Plants;Land Plants			PRJNA313682	0.135845	38.3761	plastid	NC_029418.1/KT168390.1	85	2016-03-01T00:00:00Z
Zoysia japonica	Eukaryota;Plants;Land Plants			PRJNA433139	0.135854	38.3772	plastid	NC_036827.2/MF953592.2	83	2018-02-06T00:00:00Z
Isachne albens	Eukaryota;Plants;Land Plants			PRJNA399940	0.135867	38.3242	chloroplast	NC_035530.1/MF035986.1	83	2017-08-24T00:00:00Z
Zoysia sinica	Eukaryota;Plants;Land Plants			PRJNA541647	0.135872	38.3751	plastid	NC_042187.1/MF967579.1	83	2019-05-12T00:00:00Z
Avena lusitanica	Eukaryota;Plants;Land Plants			PRJNA558015	0.135879	38.5166	chloroplast	NC_044149.1/	84	2019-08-02T00:00:00Z
Ammochloa palaestina	Eukaryota;Plants;Land Plants			PRJNA550888	0.135887	38.348	plastid	NC_042702.1/MH569075.1	83	2019-06-25T00:00:00Z
Avena maroccana	Eukaryota;Plants;Land Plants			PRJNA557969	0.135887	38.5144	chloroplast	NC_044162.1/	84	2019-08-02T00:00:00Z
Avena sterilis	Eukaryota;Plants;Land Plants			PRJNA350135	0.135887	38.5055	chloroplast	NC_031650.1/KX756180.1	84	2016-10-21T00:00:00Z
Avena fatua	Eukaryota;Plants;Land Plants			PRJNA557940	0.135889	38.5079	chloroplast	NC_044170.1/	84	2019-08-02T00:00:00Z
Avena sativa	Eukaryota;Plants;Land Plants			PRJNA289847	0.13589	38.5061	plastid	NC_027468.1/KM974733.1	84	2015-07-14T00:00:00Z
Avena murphyi	Eukaryota;Plants;Land Plants			PRJNA558020	0.135892	38.5129	chloroplast	NC_044174.1/	84	2019-08-02T00:00:00Z
Zoysia tenuifolia	Eukaryota;Plants;Land Plants			PRJNA541691	0.135892	38.3731	chloroplast	NC_042188.1/MF967580.1	83	2019-05-12T00:00:00Z
Avena occidentalis	Eukaryota;Plants;Land Plants			PRJNA557954	0.135893	38.5104	chloroplast	NC_044175.1/	84	2019-08-02T00:00:00Z
Triticum macha	Eukaryota;Plants;Land Plants			PRJNA270419	0.135899	38.316	chloroplast	NC_025955.1/LC005978.1	72	2014-12-22T00:00:00Z
Avena hybrida	Eukaryota;Plants;Land Plants			PRJNA557922	0.1359	38.5121	chloroplast	NC_044148.1/	84	2019-08-01T00:00:00Z
Zoysia macrostachya	Eukaryota;Plants;Land Plants			PRJNA541638	0.135904	38.3844	plastid	NC_042189.1/MF967581.1	83	2019-05-12T00:00:00Z
Froesiochloa boutelouoides	Eukaryota;Plants;Land Plants			PRJNA508149	0.135905	38.7278	chloroplast	NC_039983.1/MH277033.1	79	2018-12-03T00:00:00Z
Avena damascena	Eukaryota;Plants;Land Plants			PRJNA557957	0.135925	38.5065	chloroplast	NC_044166.1/	84	2019-08-02T00:00:00Z
Avena nuda	Eukaryota;Plants;Land Plants			PRJNA557941	0.135934	38.4834	chloroplast	NC_044147.1/	84	2019-08-02T00:00:00Z
Avena hispanica	Eukaryota;Plants;Land Plants			PRJNA558016	0.135935	38.4853	chloroplast	NC_044164.1/	84	2019-08-02T00:00:00Z
Avena strigosa	Eukaryota;Plants;Land Plants			PRJNA558019	0.135938	38.4845	chloroplast	NC_044171.1/	84	2019-08-02T00:00:00Z
Avena brevis	Eukaryota;Plants;Land Plants			PRJNA558017	0.135939	38.4856	chloroplast	NC_044172.1/	84	2019-08-02T00:00:00Z
Avena abyssinica	Eukaryota;Plants;Land Plants			PRJNA557989	0.135942	38.4892	chloroplast	NC_044158.1/	84	2019-08-02T00:00:00Z
Avena wiestii	Eukaryota;Plants;Land Plants			PRJNA557914	0.135944	38.4886	chloroplast	NC_044160.1/	84	2019-08-01T00:00:00Z
Avena agadiriana	Eukaryota;Plants;Land Plants			PRJNA557972	0.135945	38.492	chloroplast	NC_044159.1/	84	2019-08-02T00:00:00Z
Avena barbata	Eukaryota;Plants;Land Plants			PRJNA557988	0.135946	38.4895	chloroplast	NC_044173.1/	84	2019-08-02T00:00:00Z
Avena vaviloviana	Eukaryota;Plants;Land Plants			PRJNA558014	0.135946	38.4895	chloroplast	NC_044168.1/	84	2019-08-02T00:00:00Z
Paspalum dilatatum	Eukaryota;Plants;Land Plants			PRJNA328839	0.13595	38.6708	chloroplast	NC_030614.1/KU291477.1	83	2016-07-13T00:00:00Z
Avena canariensis	Eukaryota;Plants;Land Plants			PRJNA557987	0.135955	38.5164	chloroplast	NC_044161.1/	84	2019-08-02T00:00:00Z
Amphipogon caricinus	Eukaryota;Plants;Land Plants			PRJNA399994	0.135994	38.6363	chloroplast	NC_035520.1/MF035969.1	83	2017-08-24T00:00:00Z
Avena atlantica	Eukaryota;Plants;Land Plants			PRJNA558022	0.136006	38.4843	chloroplast	NC_044163.1/	84	2019-08-02T00:00:00Z
Festuca arundinacea	Eukaryota;Plants;Land Plants			PRJNA33289	0.136048	38.3923	chloroplast	NC_011713.2/FJ466687.2	80	2008-12-17T00:00:00Z
Alloeochaete oreogena	Eukaryota;Plants;Land Plants			PRJNA399894	0.136079	38.6401	chloroplast	NC_035518.1/MF035967.1	83	2017-08-24T00:00:00Z
Koeleria nitidula	Eukaryota;Plants;Land Plants			PRJNA546360	0.136085	38.4657	plastid	NC_042404.1/MH569083.1	83	2019-06-06T00:00:00Z
Scolochloa festucacea	Eukaryota;Plants;Land Plants			PRJNA550894	0.136088	38.5074	plastid	NC_042709.1/MH569087.1	82	2019-06-25T00:00:00Z
Torreyochloa pallida	Eukaryota;Plants;Land Plants			PRJNA289850	0.136104	38.5169	plastid	NC_027486.1/KM974752.1	84	2015-07-14T00:00:00Z
Oryza meyeriana	Eukaryota;Plants;Land Plants			PRJNA387854	0.136133	38.9443	chloroplast	NC_034765.1/KF359921.1	86	2017-05-24T00:00:00Z
Prosphytochloa prehensilis	Eukaryota;Plants;Land Plants			PRJNA439113	0.136145	38.9386	chloroplast	NC_037159.1/MF460972.1	83	2018-03-23T00:00:00Z
Triticum timopheevii	Eukaryota;Plants;Land Plants			PRJNA259644	0.136157	38.2904	chloroplast	NC_024764.1/KJ614410.1	82	2014-08-29T00:00:00Z
Alopecurus arundinaceus	Eukaryota;Plants;Land Plants			PRJNA439145	0.136189	38.3071	chloroplast	NC_037163.1/MF460977.1	83	2018-03-23T00:00:00Z
Larrea tridentata	Eukaryota;Plants;Land Plants			PRJNA298177	0.136194	35.0926	chloroplast	NC_028023.1/KT272174.1	81	2015-10-08T00:00:00Z
Cephalotaxus wilsoniana	Eukaryota;Plants;Land Plants			PRJNA74373	0.136196	35.0789	chloroplast	NC_016063.1/AP012265.1	82	2011-10-17T00:00:00Z
Olmeca reflexa	Eukaryota;Plants;Land Plants			PRJNA283087	0.136213	38.7716	plastid	NC_026965.1/KJ870997.1	83	2015-05-05T00:00:00Z
Aristida ternipes	Eukaryota;Plants;Land Plants			PRJNA439135	0.136231	38.4722	chloroplast	NC_037164.1/MF460978.1	83	2018-03-23T00:00:00Z
Dichelachne crinita	Eukaryota;Plants;Land Plants			PRJNA550915	0.136278	38.6262	plastid	NC_042705.1/MH569080.1	83	2019-06-25T00:00:00Z
Rhynchoryza subulata	Eukaryota;Plants;Land Plants			PRJNA81341	0.136303	38.9999	plastid	NC_016718.1/JN415114.1	83	2012-01-27T00:00:00Z
Rhipidocladum pittieri	Eukaryota;Plants;Land Plants			PRJNA430600	0.136314	38.8097	chloroplast	NC_036700.1/KY432792.1	86	2018-01-18T00:00:00Z
Brachypodium hybridum	Eukaryota;Plants;Land Plants			PRJNA433121	0.136327	38.5522	chloroplast	NC_036836.1/	82	2018-01-20T00:00:00Z
Brachypodium stacei	Eukaryota;Plants;Land Plants			PRJNA433120	0.13633	38.552	chloroplast	NC_036837.1/	82	2018-01-20T00:00:00Z
Elytrophorus spicatus	Eukaryota;Plants;Land Plants			PRJNA262794	0.136346	38.447	plastid	NC_025233.1/KJ920230.1	83	2014-10-04T00:00:00Z
Otatea acuminata	Eukaryota;Plants;Land Plants			PRJNA283085	0.136351	38.7771	plastid	NC_026971.1/KJ871003.1	83	2015-05-05T00:00:00Z
Zizania aquatica	Eukaryota;Plants;Land Plants			PRJNA283081	0.136364	39.0162	plastid	NC_026967.1/KJ870999.1	84	2015-05-05T00:00:00Z
Otatea glauca	Eukaryota;Plants;Land Plants			PRJNA305023	0.136377	38.78	plastid	NC_028631.1/KP319243.1	84	2015-12-03T00:00:00Z
Anthoxanthum nitens	Eukaryota;Plants;Land Plants			PRJNA289769	0.136395	38.4714	plastid	NC_027475.1/KM974740.1	84	2015-07-14T00:00:00Z
Elytrophorus globularis	Eukaryota;Plants;Land Plants			PRJNA399999	0.136403	38.4508	chloroplast	NC_035527.1/MF035980.1	83	2017-08-24T00:00:00Z
Amentotaxus formosana	Eukaryota;Plants;Land Plants			PRJNA261918	0.13643	35.8286	chloroplast	NC_024945.1/AP014574.1	83	2014-10-16T00:00:00Z
Passiflora misera	Eukaryota;Plants;Land Plants			PRJNA553962	0.136455	37.2042	chloroplast	NC_043821.1/MK694928.1	83	2019-07-22T00:00:00Z
Zizania latifolia	Eukaryota;Plants;Land Plants			PRJNA313582	0.136461	38.9958	chloroplast	NC_029401.1/KT161956.1	83	2016-03-01T00:00:00Z
Hordeum vulgare subsp. vulgare	Eukaryota;Plants;Land Plants			PRJNA18287	0.136462	38.3191	chloroplast	NC_008590.1/EF115541.1	83	2006-11-28T00:00:00Z
Merxmuellera tsaratananensis	Eukaryota;Plants;Land Plants			PRJNA414851	0.136522	38.5425	chloroplast	NC_036122.1/MF563375.1	82	2017-10-18T00:00:00Z
Hordeum vulgare subsp. spontaneum	Eukaryota;Plants;Land Plants		SAMN09906255	PRJNA550701	0.136536	38.3035	chloroplast	NC_042692.1/MH795067.1	83	2019-06-25T00:00:00Z
Triplachne nitens	Eukaryota;Plants;Land Plants			PRJNA550897	0.136539	38.5091	plastid	NC_042710.1/MH569088.1	84	2019-06-25T00:00:00Z
Leersia tisserantii	Eukaryota;Plants;Land Plants			PRJNA81263	0.136551	38.8785	plastid	NC_016677.1/JN415112.1	83	2012-01-27T00:00:00Z
Chikusichloa aquatica	Eukaryota;Plants;Land Plants			PRJNA285578	0.136563	39.0443	chloroplast	NC_027184.1/KR078265.1	83	2015-06-02T00:00:00Z
Agrostis stolonifera	Eukaryota;Plants;Land Plants			PRJNA18285	0.136584	38.4518	chloroplast	NC_008591.1/EF115543.1	85	2006-11-28T00:00:00Z
Psathyrostachys juncea	Eukaryota;Plants;Land Plants			PRJNA553897	0.136597	38.4159	chloroplast	NC_043838.1/MH331640.1	83	2019-07-22T00:00:00Z
Chikusichloa mutica	Eukaryota;Plants;Land Plants			PRJNA527582	0.136603	39.0365	chloroplast	NC_041081.1/KU696970.1	83	2019-03-18T00:00:00Z
Gastridium ventricosum	Eukaryota;Plants;Land Plants			PRJNA430608	0.136606	38.5064	chloroplast	NC_036686.1/KY432778.1	84	2018-01-18T00:00:00Z
Psathyrostachys huashanica	Eukaryota;Plants;Land Plants			PRJNA608309	0.136632	38.4573	chloroplast	NC_045871.1/MK135434.1	84	2020-02-24T00:00:00Z
Polypogon fugax	Eukaryota;Plants;Land Plants			PRJNA550913	0.136639	38.4854	plastid	NC_042708.1/MH569086.1	84	2019-06-25T00:00:00Z
Amentotaxus argotaenia	Eukaryota;Plants;Land Plants			PRJNA290761	0.136657	35.8511	chloroplast	NC_027581.1/KR780582.1	83	2015-07-23T00:00:00Z
Rehia nervata	Eukaryota;Plants;Land Plants			PRJNA508148	0.1367	38.8193	chloroplast	NC_039984.1/MH277034.1	84	2018-12-03T00:00:00Z
Agrostis gigantea	Eukaryota;Plants;Land Plants			PRJNA439136	0.136705	38.499	chloroplast	NC_037162.1/MF460976.1	84	2018-03-23T00:00:00Z
Ammophila breviligulata	Eukaryota;Plants;Land Plants			PRJNA289770	0.136726	38.5552	plastid	NC_027465.1/KM974730.1	84	2015-07-14T00:00:00Z
Downingia cuspidata	Eukaryota;Plants;Land Plants			PRJNA394260	0.136733	41.1276	plastid	NC_035359.1/MF061171.1	73	2017-07-14T00:00:00Z
Dregeochloa pumilla	Eukaryota;Plants;Land Plants			PRJNA399996	0.136746	38.3982	chloroplast	NC_035526.1/MF035979.1	83	2017-08-24T00:00:00Z
Leymus chinensis	Eukaryota;Plants;Land Plants			PRJNA574377	0.136783	38.4236	chloroplast	NC_044900.1/MH707612.1	84	2019-09-26T00:00:00Z
Olyra latifolia	Eukaryota;Plants;Land Plants			PRJNA248874	0.136785	38.8661	plastid	NC_024165.1/KF515509.1	80	2014-05-30T00:00:00Z
Dichanthium annulatum	Eukaryota;Plants;Land Plants			PRJNA541646	0.136805	38.6258	chloroplast	NC_042145.1/MH488955.1	88	2019-05-12T00:00:00Z
Drosera regia	Eukaryota;Plants;Land Plants			PRJNA394357	0.13681	37.6296	chloroplast	NC_035415.1/KY679199.1	72	2017-07-14T00:00:00Z
Briza maxima	Eukaryota;Plants;Land Plants			PRJNA289767	0.136823	38.332	plastid	NC_027471.1/KM974736.1	84	2015-07-14T00:00:00Z
Hordeum jubatum	Eukaryota;Plants;Land Plants			PRJNA289845	0.136826	38.2413	plastid	NC_027476.1/KM974741.1	82	2015-07-14T00:00:00Z
Taeniatherum caput-medusae	Eukaryota;Plants;Land Plants			PRJNA439131	0.136827	38.3148	chloroplast	NC_037160.1/MF460974.1	84	2018-03-23T00:00:00Z
Littledalea alaica	Eukaryota;Plants;Land Plants			PRJNA453344	0.13684	38.5121	chloroplast	NC_037519.1/MG570144.1	81	2018-04-24T00:00:00Z
Chusquea spectabilis	Eukaryota;Plants;Land Plants			PRJNA283083	0.136848	38.8131	plastid	NC_026959.1/KJ870990.1	83	2015-05-05T00:00:00Z
Littledalea racemosa	Eukaryota;Plants;Land Plants			PRJNA420537	0.136852	38.5088	chloroplast	NC_036350.1/MF614917.1	82	2017-12-01T00:00:00Z
Aegilops bicornis	Eukaryota;Plants;Land Plants			PRJNA261225	0.136861	38.2936	chloroplast	NC_024831.1/KJ614418.1	82	2014-09-18T00:00:00Z
Littledalea przevalskyi	Eukaryota;Plants;Land Plants			PRJNA453251	0.136862	38.5096	chloroplast	NC_037497.1/MG463107.1	84	2018-04-24T00:00:00Z
Aegilops searsii	Eukaryota;Plants;Land Plants			PRJNA261043	0.136863	38.2952	chloroplast	NC_024815.1/KJ614414.1	82	2014-10-22T00:00:00Z
Aegilops sharonensis	Eukaryota;Plants;Land Plants			PRJNA261040	0.136867	38.2941	chloroplast	NC_024816.1/KJ614419.1	82	2014-10-16T00:00:00Z
Aegilops kotschyi	Eukaryota;Plants;Land Plants			PRJNA261195	0.136868	38.2931	chloroplast	NC_024832.1/KJ614420.1	82	2014-10-22T00:00:00Z
Aegilops longissima	Eukaryota;Plants;Land Plants			PRJNA261224	0.136875	38.2926	chloroplast	NC_024830.1/KJ614416.1	82	2014-09-18T00:00:00Z
Cephalotaxus hainanensis	Eukaryota;Plants;Land Plants			PRJNA546385	0.136877	35.0497	chloroplast	NC_042392.1/MH311692.1	82	2019-06-06T00:00:00Z
Piptatherum songaricum	Eukaryota;Plants;Land Plants			PRJNA430589	0.136908	38.8115	chloroplast	NC_036699.1/KY432791.1	83	2018-01-18T00:00:00Z
Bromus vulgaris	Eukaryota;Plants;Land Plants			PRJNA289773	0.136934	38.3338	plastid	NC_027472.1/KM974737.1	82	2015-07-14T00:00:00Z
Ampelodesmos mauritanicus	Eukaryota;Plants;Land Plants			PRJNA289843	0.136937	38.831	plastid	NC_027466.1/KM974731.1	83	2015-07-14T00:00:00Z
Torreya grandis	Eukaryota;Plants;Land Plants			PRJNA387894	0.136949	35.4365	chloroplast	NC_034806.1/KY369757.1	88	2017-05-24T00:00:00Z
Hordeum bogdanii	Eukaryota;Plants;Land Plants			PRJNA553898	0.136968	38.2403	chloroplast	NC_043839.1/MH331641.1	83	2019-07-22T00:00:00Z
Lygeum spartum	Eukaryota;Plants;Land Plants			PRJNA430615	0.137039	38.6547	chloroplast	NC_036693.1/KY432785.1	84	2018-01-18T00:00:00Z
Eragrostis walteri	Eukaryota;Plants;Land Plants			PRJNA399888	0.137056	38.3099	chloroplast	NC_035528.1/MF035982.1	83	2017-08-24T00:00:00Z
Corallorhiza cf. striata 'CA'	Eukaryota;Plants;Land Plants			PRJNA524570	0.137068	36.4936	plastid	NC_040982.1/MG874040.1	49	2019-02-27T00:00:00Z
Torreya fargesii	Eukaryota;Plants;Land Plants			PRJNA313617	0.137075	35.4653	chloroplast	NC_029398.1/KT027377.1	82	2016-03-01T00:00:00Z
Arundo donax	Eukaryota;Plants;Land Plants			PRJNA438323	0.137093	38.6293	chloroplast	NC_037077.1/KX109945.1	97	2018-03-14T00:00:00Z
Torreya parvifolia	Eukaryota;Plants;Land Plants			PRJNA553915	0.137106	35.4733	chloroplast	NC_043866.1/MH744490.1	82	2019-07-22T00:00:00Z
Arundo plinii	Eukaryota;Plants;Land Plants			PRJNA387757	0.137128	38.623	chloroplast	NC_034652.1/KX109946.1	97	2017-05-24T00:00:00Z
Gentiana obconica	Eukaryota;Plants;Land Plants			PRJNA479120	0.137278	38.0396	chloroplast	NC_037981.1/MG192306.1	74	2018-07-05T00:00:00Z
Aristida pruinosa	Eukaryota;Plants;Land Plants			PRJNA550721	0.137353	38.5401	chloroplast	NC_042836.1/MK590083.1	81	2019-06-25T00:00:00Z
Stipa purpurea	Eukaryota;Plants;Land Plants			PRJNA313725	0.13737	38.7923	chloroplast	NC_029390.1/KT983629.1	84	2016-03-01T00:00:00Z
Gentiana ornata	Eukaryota;Plants;Land Plants			PRJNA479257	0.137385	38.0646	chloroplast	NC_037983.1/MG192308.1	73	2018-07-05T00:00:00Z
Brachyelytrum aristosum	Eukaryota;Plants;Land Plants			PRJNA289848	0.137399	38.6269	plastid	NC_027470.1/KM974735.1	86	2015-07-14T00:00:00Z
Gentiana oreodoxa	Eukaryota;Plants;Land Plants			PRJNA479190	0.137403	38.045	chloroplast	NC_037982.1/MG192307.1	73	2018-07-05T00:00:00Z
Diarrhena obovata	Eukaryota;Plants;Land Plants			PRJNA289852	0.137421	38.8128	plastid	NC_027474.1/KM974739.1	83	2015-07-14T00:00:00Z
Gentiana hexaphylla	Eukaryota;Plants;Land Plants			PRJNA479258	0.137423	38.0417	chloroplast	NC_037980.1/MG192305.1	74	2018-07-05T00:00:00Z
Oplismenus hirtellus	Eukaryota;Plants;Land Plants			PRJNA328853	0.137424	38.5784	chloroplast	NC_030491.1/KU291473.1	83	2016-07-13T00:00:00Z
Anigozanthos flavidus	Eukaryota;Plants;Land Plants			PRJNA509815	0.137426	34.1777	chloroplast	NC_040160.1/MH588512.1	79	2018-12-14T00:00:00Z
Styppeiochloa gynoglossa	Eukaryota;Plants;Land Plants			PRJNA399997	0.137458	38.6533	chloroplast	NC_035535.1/MF035997.1	83	2017-08-24T00:00:00Z
Gentiana veitchiorum	Eukaryota;Plants;Land Plants			PRJNA479148	0.137467	38.0317	chloroplast	NC_037985.1/MG192310.1	76	2018-07-05T00:00:00Z
Diandrolyra sp. Clark 1301	Eukaryota;Plants;Land Plants			PRJNA283095	0.137469	38.8102	plastid	NC_026960.1/KJ870991.1	80	2015-05-05T00:00:00Z
Paspalum juergensii	Eukaryota;Plants;Land Plants			PRJNA495582	0.137513	38.7622	chloroplast	NC_039459.1/MG523994.1	83	2018-10-10T00:00:00Z
Phragmites australis	Eukaryota;Plants;Land Plants			PRJNA230082	0.137561	38.6527	chloroplast	NC_022958.1/KF730315.1	85	2013-12-04T00:00:00Z
Molinia caerulea	Eukaryota;Plants;Land Plants			PRJNA377072	0.137574	38.6468	plastid	NC_033980.1/KX463053.1	81	2017-02-27T00:00:00Z
Monachather paradoxus	Eukaryota;Plants;Land Plants			PRJNA262803	0.137625	38.5649	plastid	NC_025237.1/KJ920235.1	83	2014-10-04T00:00:00Z
Gentiana caelestis	Eukaryota;Plants;Land Plants			PRJNA479067	0.137644	38.0445	chloroplast	NC_037979.1/MG192304.1	73	2018-07-05T00:00:00Z
Bothriochloa alta	Eukaryota;Plants;Land Plants			PRJNA328838	0.137645	38.5513	chloroplast	NC_030621.1/KU291492.1	83	2016-07-13T00:00:00Z
Aristida rufescens	Eukaryota;Plants;Land Plants			PRJNA414859	0.137659	38.5264	chloroplast	NC_036130.1/MF563384.1	82	2017-10-18T00:00:00Z
Piptochaetium avenaceum	Eukaryota;Plants;Land Plants			PRJNA289849	0.137701	38.7739	plastid	NC_027483.1/KM974748.1	83	2015-07-14T00:00:00Z
Nassella hyalina	Eukaryota;Plants;Land Plants			PRJNA430604	0.13771	38.8105	chloroplast	NC_036696.1/KY432788.1	84	2018-01-18T00:00:00Z
Stipa hymenoides	Eukaryota;Plants;Land Plants			PRJNA289853	0.137742	38.8175	plastid	NC_027464.1/KM974729.1	84	2015-07-14T00:00:00Z
Stipa hohenackeriana	Eukaryota;Plants;Land Plants			PRJNA435335	0.137753	38.7926	plastid	NC_037028.1/MG052603.1	81	2018-02-22T00:00:00Z
Stipa arabica	Eukaryota;Plants;Land Plants			PRJNA435377	0.137757	38.79	plastid	NC_037024.1/MG052596.1	81	2018-02-22T00:00:00Z
Humbertochloa bambusiuscula	Eukaryota;Plants;Land Plants			PRJNA430655	0.137797	38.9341	chloroplast	NC_036691.1/KY432783.1	83	2018-01-18T00:00:00Z
Stipa caucasica	Eukaryota;Plants;Land Plants			PRJNA435380	0.137798	38.7974	plastid	NC_037027.1/MG052600.1	81	2018-02-22T00:00:00Z
Stipa orientalis	Eukaryota;Plants;Land Plants			PRJNA435378	0.137822	38.7906	plastid	NC_037033.1/MG052608.1	81	2018-02-22T00:00:00Z
Stipa borysthenica	Eukaryota;Plants;Land Plants			PRJNA435382	0.137825	38.7912	plastid	NC_037025.1/MG052597.1	81	2018-02-22T00:00:00Z
Stipa jagnobica	Eukaryota;Plants;Land Plants			PRJNA435334	0.137827	38.7914	plastid	NC_037029.1/MG052604.1	81	2018-02-22T00:00:00Z
Stipa richteriana	Eukaryota;Plants;Land Plants			PRJNA532209	0.137827	38.7928	plastid	NC_041508.1/MH918073.1	86	2019-04-10T00:00:00Z
Stipa heptapotamica	Eukaryota;Plants;Land Plants			PRJNA532100	0.137829	38.7923	plastid	NC_041507.1/MH918066.1	86	2019-04-10T00:00:00Z
Stipa lessingiana	Eukaryota;Plants;Land Plants			PRJNA435379	0.137829	38.7923	plastid	NC_037030.1/MG052605.1	81	2018-02-22T00:00:00Z
Stipa capillata	Eukaryota;Plants;Land Plants			PRJNA435381	0.13783	38.7971	plastid	NC_037026.1/MG052598.1	81	2018-02-22T00:00:00Z
Stipa zalesskii	Eukaryota;Plants;Land Plants			PRJNA435399	0.137836	38.7889	plastid	NC_037037.1/MG052616.1	81	2018-02-22T00:00:00Z
Stipa magnifica	Eukaryota;Plants;Land Plants			PRJNA435346	0.137848	38.7877	plastid	NC_037031.1/MG052606.1	81	2018-02-22T00:00:00Z
Stipa x alaica	Eukaryota;Plants;Land Plants			PRJNA435332	0.13785	38.7994	plastid	NC_037035.1/MG052614.1	81	2018-02-22T00:00:00Z
Stipa x brevicallosa	Eukaryota;Plants;Land Plants			PRJNA435336	0.13785	38.8009	plastid	NC_037036.1/MG052615.1	81	2018-02-22T00:00:00Z
Stipa lipskyi	Eukaryota;Plants;Land Plants			PRJNA302492	0.137854	38.8005	chloroplast	NC_028444.1/KT692644.1	81	2015-11-17T00:00:00Z
Stipa narynica	Eukaryota;Plants;Land Plants			PRJNA435345	0.137854	38.8005	plastid	NC_037032.1/MG052607.1	81	2018-02-22T00:00:00Z
Phyllorachis sagittata	Eukaryota;Plants;Land Plants			PRJNA430640	0.137864	38.9413	chloroplast	NC_036698.1/KY432790.1	88	2018-01-18T00:00:00Z
Stipa ovczinnikovii	Eukaryota;Plants;Land Plants			PRJNA435333	0.137874	38.7854	plastid	NC_037034.1/MG052609.1	81	2018-02-22T00:00:00Z
Phaenosperma globosum	Eukaryota;Plants;Land Plants			PRJNA289851	0.137897	38.8072	plastid	NC_027480.1/KM974745.1	84	2015-07-14T00:00:00Z
Crinipes abyssinicus	Eukaryota;Plants;Land Plants			PRJNA399892	0.137909	38.6436	chloroplast	NC_035523.1/MF035975.1	83	2017-08-24T00:00:00Z
Chusquea circinata	Eukaryota;Plants;Land Plants			PRJNA289807	0.137951	38.8754	plastid	NC_027490.1/KP319241.1	84	2015-07-14T00:00:00Z
Chasechloa madagascariensis	Eukaryota;Plants;Land Plants			PRJNA376946	0.137987	38.6189	chloroplast	NC_033880.1/KX663838.1	81	2017-02-27T00:00:00Z
Chusquea liebmannii	Eukaryota;Plants;Land Plants			PRJNA283086	0.138001	38.8388	plastid	NC_026969.1/KJ871001.1	82	2015-05-05T00:00:00Z
Selaginella pennata	Eukaryota;Plants;Land Plants			PRJNA532030	0.138024	52.9212	chloroplast	NC_041643.1/MH598534.1	74	2019-04-10T00:00:00Z
Stipagrostis hirtigluma	Eukaryota;Plants;Land Plants			PRJNA414817	0.138026	38.5094	chloroplast	NC_036112.1/MF563365.1	82	2017-10-18T00:00:00Z
Schizachyrium brevifolium	Eukaryota;Plants;Land Plants			PRJNA390346	0.138027	38.5997	chloroplast	NC_035013.1/KY596122.1	83	2017-06-13T00:00:00Z
Crinipes longifolius	Eukaryota;Plants;Land Plants			PRJNA399988	0.13803	38.6155	chloroplast	NC_035524.1/MF035976.1	83	2017-08-24T00:00:00Z
Sartidia dewinteri	Eukaryota;Plants;Land Plants			PRJNA285537	0.138074	38.4142	chloroplast	NC_027147.1/KJ819550.1	83	2015-06-02T00:00:00Z
Passiflora filipes	Eukaryota;Plants;Land Plants			PRJNA553936	0.138086	36.7771	chloroplast	NC_043822.1/MK694929.1	83	2019-07-22T00:00:00Z
Setaria viridis	Eukaryota;Plants;Land Plants			PRJNA298791	0.138102	38.7156	chloroplast	NC_028075.1/KT289405.1	85	2015-10-14T00:00:00Z
Buergersiochloa bambusoides	Eukaryota;Plants;Land Plants			PRJNA283080	0.138122	38.9779	plastid	NC_026968.1/KJ871000.1	83	2015-05-05T00:00:00Z
Chusquea culeou	Eukaryota;Plants;Land Plants			PRJNA550904	0.138137	38.844	chloroplast	NC_042672.1/MH410122.1	84	2019-06-25T00:00:00Z
Alloteropsis semialata	Eukaryota;Plants;Land Plants		SAMN09668083	PRJNA481434	0.138161	38.4942	chloroplast	Pltd:CM014279.1	0	2019-02-04T00:00:00Z
Cenchrus purpureus	Eukaryota;Plants;Land Plants			PRJNA420710	0.138199	38.5929	chloroplast	NC_036384.1/MF594682.1	88	2017-12-18T00:00:00Z
Alloteropsis semialata	Eukaryota;Plants;Land Plants			PRJNA295218	0.138209	38.4881	chloroplast	NC_027824.1/KT281147.1	83	2015-09-14T00:00:00Z
Capillipedium venustum	Eukaryota;Plants;Land Plants			PRJNA328837	0.138257	38.5102	chloroplast	NC_030622.1/KU291493.1	83	2016-07-13T00:00:00Z
Ophioglossum californicum	Eukaryota;Plants;Land Plants			PRJNA186766	0.13827	42.1545	chloroplast	NC_020147.1/KC117178.1	84	2013-01-18T00:00:00Z
Dichanthium sericeum	Eukaryota;Plants;Land Plants			PRJNA390350	0.138271	38.5063	chloroplast	NC_035018.1/KY596128.1	83	2017-06-13T00:00:00Z
Hickelia madagascariensis	Eukaryota;Plants;Land Plants			PRJNA283096	0.138276	38.9091	plastid	NC_026962.1/KJ870994.1	83	2015-05-05T00:00:00Z
Sciadopitys verticillata	Eukaryota;Plants;Land Plants			PRJNA316282	0.138284	35.4206	chloroplast	NC_029734.1/KT601210.1	82	2016-03-28T00:00:00Z
Kerriochloa siamensis	Eukaryota;Plants;Land Plants			PRJNA390318	0.138335	38.3027	chloroplast	NC_035009.1/KY596117.1	82	2017-06-13T00:00:00Z
Loudetiopsis kerstingii	Eukaryota;Plants;Land Plants			PRJNA328842	0.138377	38.7138	chloroplast	NC_030612.1/KU291469.1	83	2016-07-13T00:00:00Z
Bothriochloa decipiens	Eukaryota;Plants;Land Plants			PRJNA509808	0.138381	38.506	chloroplast	NC_040131.1/MH660709.1	83	2018-12-14T00:00:00Z
Anomochloa marantoidea	Eukaryota;Plants;Land Plants			PRJNA48057	0.138412	38.6599	chloroplast	NC_014062.1/GQ329703.1	85	2010-04-23T00:00:00Z
Aristida purpurea	Eukaryota;Plants;Land Plants			PRJNA262800	0.138423	38.5001	plastid	NC_025228.1/KJ920224.1	85	2014-10-04T00:00:00Z
Sartidia perrieri	Eukaryota;Plants;Land Plants			PRJNA285544	0.138471	38.3806	chloroplast	NC_027146.1/KJ819549.1	83	2015-06-02T00:00:00Z
Distichlis spicata	Eukaryota;Plants;Land Plants			PRJNA318185	0.138504	38.1967	plastid	NC_029895.1/KT168395.1	85	2016-04-12T00:00:00Z
Schizachyrium exile	Eukaryota;Plants;Land Plants			PRJNA390401	0.138519	38.5514	chloroplast	NC_035029.1/KY596147.1	83	2017-06-13T00:00:00Z
Schizachyrium tenerum	Eukaryota;Plants;Land Plants			PRJNA390347	0.138555	38.5139	chloroplast	NC_035043.1/KY596172.1	83	2017-06-13T00:00:00Z
Loudetia simplex	Eukaryota;Plants;Land Plants			PRJNA414822	0.1386	38.8066	chloroplast	NC_036113.1/MF563366.1	82	2017-10-18T00:00:00Z
Sartidia isaloensis	Eukaryota;Plants;Land Plants			PRJNA414860	0.138607	38.3877	chloroplast	NC_036117.1/MF563370.1	82	2017-10-18T00:00:00Z
Andropogon fastigiatus	Eukaryota;Plants;Land Plants			PRJNA390349	0.138658	38.5632	chloroplast	NC_035010.1/KY596118.1	83	2017-06-13T00:00:00Z
Andropogon gayanus	Eukaryota;Plants;Land Plants			PRJNA509862	0.138675	38.5571	chloroplast	NC_040127.1/MH181174.1	83	2018-12-14T00:00:00Z
Cenchrus ciliaris	Eukaryota;Plants;Land Plants			PRJNA532158	0.138737	38.609	chloroplast	NC_041434.1/MH286942.1	86	2019-04-10T00:00:00Z
Andropogon abyssinicus	Eukaryota;Plants;Land Plants			PRJNA390390	0.138738	38.5295	chloroplast	NC_035030.1/KY596148.1	83	2017-06-13T00:00:00Z
Homolepis aturensis	Eukaryota;Plants;Land Plants			PRJNA414834	0.138757	38.6647	chloroplast	NC_036125.1/MF563378.1	82	2017-10-18T00:00:00Z
Urochloa ruziziensis	Eukaryota;Plants;Land Plants			PRJNA320583	0.138765	38.6315	chloroplast	NC_030068.1/KR232943.1	83	2016-05-04T00:00:00Z
Andropogon chinensis	Eukaryota;Plants;Land Plants			PRJNA390334	0.138817	38.5666	chloroplast	NC_035012.1/KY596121.1	83	2017-06-13T00:00:00Z
Themeda arguens	Eukaryota;Plants;Land Plants			PRJNA390360	0.138827	38.5566	chloroplast	NC_035019.1/KY596129.1	83	2017-06-13T00:00:00Z
Psilotum nudum	Eukaryota;Plants;Land Plants			PRJNA12235	0.138829	36.0314	chloroplast	NC_003386.1/AP004638.1	101	2002-01-29T00:00:00Z
Andropogon greenwayi	Eukaryota;Plants;Land Plants			PRJNA509807	0.138831	38.5166	chloroplast	NC_040128.1/MH181176.1	83	2018-12-14T00:00:00Z
Andropogon ascinodis	Eukaryota;Plants;Land Plants			PRJNA509811	0.138841	38.5635	chloroplast	NC_040129.1/MH181188.1	83	2018-12-14T00:00:00Z
Themeda triandra	Eukaryota;Plants;Land Plants			PRJNA390330	0.138865	38.5468	chloroplast	NC_035016.1/KY596125.1	82	2017-06-13T00:00:00Z
Homolepis isocalycia	Eukaryota;Plants;Land Plants			PRJNA430664	0.138875	38.6916	chloroplast	NC_036690.1/KY432782.1	85	2018-01-18T00:00:00Z
Stenotaphrum secundatum	Eukaryota;Plants;Land Plants			PRJNA430662	0.138907	38.6467	chloroplast	NC_036704.1/KY432796.1	85	2018-01-18T00:00:00Z
Tristachya leucothrix	Eukaryota;Plants;Land Plants			PRJNA430624	0.138918	38.7372	chloroplast	NC_036708.1/KY432801.1	83	2018-01-18T00:00:00Z
Arundinaria gigantea	Eukaryota;Plants;Land Plants			PRJNA190118	0.138935	38.9326	chloroplast	NC_020341.1/JX235347.1	83	2013-02-25T00:00:00Z
Urochloa decumbens	Eukaryota;Plants;Land Plants			PRJNA320584	0.138945	38.5915	chloroplast	NC_030066.1/KR232941.1	83	2016-05-04T00:00:00Z
Urochloa brizantha	Eukaryota;Plants;Land Plants			PRJNA320585	0.138946	38.5905	chloroplast	NC_030067.1/KR232942.1	83	2016-05-04T00:00:00Z
Panicum lycopodioides	Eukaryota;Plants;Land Plants			PRJNA414831	0.138954	38.6056	chloroplast	NC_036121.1/MF563374.1	82	2017-10-18T00:00:00Z
Themeda quadrivalvis	Eukaryota;Plants;Land Plants			PRJNA400028	0.138961	38.5317	chloroplast	NC_035492.1/KY707773.1	82	2017-08-24T00:00:00Z
Eremochloa ciliaris	Eukaryota;Plants;Land Plants			PRJNA390387	0.13897	38.3133	chloroplast	NC_035028.1/KY596146.1	83	2017-06-13T00:00:00Z
Brachiaria humidicola	Eukaryota;Plants;Land Plants			PRJNA320582	0.138976	38.4951	chloroplast	NC_030069.1/KR232944.1	83	2016-05-04T00:00:00Z
Megathyrsus maximus	Eukaryota;Plants;Land Plants			PRJNA328833	0.138994	38.5693	chloroplast	NC_030489.1/KU291470.1	83	2016-07-13T00:00:00Z
Eremochloa eriopoda	Eukaryota;Plants;Land Plants			PRJNA390386	0.138995	38.3071	chloroplast	NC_035023.1/KY596134.1	83	2017-06-13T00:00:00Z
Passiflora affinis	Eukaryota;Plants;Land Plants			PRJNA553909	0.139005	37.0987	chloroplast	NC_043823.1/MK694930.1	81	2019-07-22T00:00:00Z
Eremochloa ophiuroides	Eukaryota;Plants;Land Plants			PRJNA430582	0.139061	38.4026	chloroplast	NC_036716.1/KY432809.1	83	2018-01-18T00:00:00Z
Lecomtella madagascariensis	Eukaryota;Plants;Land Plants			PRJNA247687	0.139073	38.6171	chloroplast	NC_024106.1/HF543599.2	84	2014-05-01T00:00:00Z
Andropogon distachyos	Eukaryota;Plants;Land Plants			PRJNA390331	0.139098	38.5196	chloroplast	NC_035041.1/KY596170.1	83	2017-06-13T00:00:00Z
Tristachya humbertii	Eukaryota;Plants;Land Plants			PRJNA414850	0.139098	38.6857	chloroplast	NC_036115.1/MF563368.1	82	2017-10-18T00:00:00Z
Oldeania ibityensis	Eukaryota;Plants;Land Plants			PRJNA433143	0.13913	38.8464	plastid	NC_036818.1/MF066249.1	83	2018-02-06T00:00:00Z
Paspalidium geminatum	Eukaryota;Plants;Land Plants			PRJNA328850	0.139142	38.5721	chloroplast	NC_030494.1/KU291476.1	83	2016-07-13T00:00:00Z
Hildaea pallens	Eukaryota;Plants;Land Plants			PRJNA414848	0.139145	38.6582	chloroplast	NC_036124.1/MF563377.1	82	2017-10-18T00:00:00Z
Hitchcockella baronii	Eukaryota;Plants;Land Plants			PRJNA563422	0.139167	38.8756	chloroplast	NC_044487.1/MF508720.1	82	2019-09-06T00:00:00Z
Danthoniopsis dinteri	Eukaryota;Plants;Land Plants			PRJNA328831	0.139169	38.6918	chloroplast	NC_030502.1/KU291495.1	83	2016-07-13T00:00:00Z
Hyparrhenia subplumosa	Eukaryota;Plants;Land Plants			PRJNA328843	0.139174	38.5086	chloroplast	NC_030625.1/KU291500.1	83	2016-07-13T00:00:00Z
Hyparrhenia diplandra	Eukaryota;Plants;Land Plants			PRJNA390377	0.139175	38.5364	chloroplast	NC_035037.1/KY596163.1	83	2017-06-13T00:00:00Z
Whiteochloa capillipes	Eukaryota;Plants;Land Plants			PRJNA328857	0.139177	38.6134	chloroplast	NC_030618.1/KU291487.1	83	2016-07-13T00:00:00Z
Alloeochaete namuliensis	Eukaryota;Plants;Land Plants			PRJNA399895	0.13919	38.5998	chloroplast	NC_035517.1/MF035966.1	83	2017-08-24T00:00:00Z
Pogonatherum paniceum	Eukaryota;Plants;Land Plants			PRJNA318216	0.139205	38.416	chloroplast	NC_029881.1/KU961859.1	83	2016-04-12T00:00:00Z
Schizachyrium spicatum	Eukaryota;Plants;Land Plants			PRJNA390361	0.139205	38.4591	chloroplast	NC_035039.1/KY596166.1	83	2017-06-13T00:00:00Z
Axonopus fissifolius	Eukaryota;Plants;Land Plants			PRJNA328854	0.13925	38.6434	chloroplast	NC_030501.1/KU291491.1	83	2016-07-13T00:00:00Z
Paspalum glaziovii	Eukaryota;Plants;Land Plants			PRJNA328847	0.139255	38.7203	chloroplast	NC_030496.1/KU291479.1	83	2016-07-13T00:00:00Z
Chaetium bromoides	Eukaryota;Plants;Land Plants			PRJNA430665	0.139257	38.5316	chloroplast	NC_036712.1/KY432805.1	85	2018-01-18T00:00:00Z
Passiflora biflora	Eukaryota;Plants;Land Plants			PRJNA483612	0.139263	37.1283	chloroplast	NC_038120.1/MF807937.1	81	2018-07-31T00:00:00Z
Hyparrhenia rufa	Eukaryota;Plants;Land Plants			PRJNA390397	0.139269	38.5025	chloroplast	NC_035011.1/KY596119.1	83	2017-06-13T00:00:00Z
Schizachyrium sanguineum	Eukaryota;Plants;Land Plants			PRJNA390348	0.139272	38.4751	chloroplast	NC_035015.1/KY596124.1	83	2017-06-13T00:00:00Z
Schizachyrium scoparium	Eukaryota;Plants;Land Plants			PRJNA390370	0.139274	38.5018	chloroplast	NC_035032.1/KY596154.1	83	2017-06-13T00:00:00Z
Bambusa arnhemica	Eukaryota;Plants;Land Plants			PRJNA283088	0.139289	38.9241	plastid	NC_026958.1/KJ870989.1	83	2015-05-05T00:00:00Z
Alloteropsis cimicina	Eukaryota;Plants;Land Plants			PRJNA297996	0.139317	38.6012	chloroplast	NC_027952.1/KT281156.1	83	2015-10-07T00:00:00Z
Bambusa oldhamii	Eukaryota;Plants;Land Plants			PRJNA39309	0.13935	38.9214	chloroplast	NC_012927.1/FJ970915.1	82	2009-07-10T00:00:00Z
Greslania sp. McPherson 19217	Eukaryota;Plants;Land Plants			PRJNA283094	0.139351	38.7288	plastid	NC_026961.1/KJ870993.1	83	2015-05-05T00:00:00Z
Panicum sumatrense	Eukaryota;Plants;Land Plants			PRJNA359051	0.139384	38.6242	chloroplast	NC_032378.1/KX756177.1	85	2016-12-27T00:00:00Z
Bambusa multiplex	Eukaryota;Plants;Land Plants			PRJNA257597	0.139394	38.9106	chloroplast	NC_024668.1/KJ722536.1	85	2014-08-06T00:00:00Z
Dendrocalamus latiflorus	Eukaryota;Plants;Land Plants			PRJNA39905	0.139394	38.9199	chloroplast	NC_013088.1/FJ970916.1	85	2009-08-14T00:00:00Z
Alloeochaete uluguruensis	Eukaryota;Plants;Land Plants			PRJNA399893	0.139395	38.5853	chloroplast	NC_035519.1/MF035968.1	83	2017-08-24T00:00:00Z
Neololeba atra	Eukaryota;Plants;Land Plants			PRJNA283082	0.139395	38.8823	plastid	NC_026964.1/KJ870996.1	83	2015-05-05T00:00:00Z
Dendrocalamus sinicus	Eukaryota;Plants;Land Plants			PRJNA608318	0.139441	38.9161	chloroplast	NC_045941.1/MK962316.1	88	2020-02-24T00:00:00Z
Neohouzeaua sp. Clark & Attigala 1712	Eukaryota;Plants;Land Plants			PRJNA283118	0.139458	38.9192	plastid	NC_026963.1/KJ870995.1	83	2015-05-05T00:00:00Z
Bambusa ventricosa	Eukaryota;Plants;Land Plants			PRJNA550905	0.13946	38.9022	chloroplast	NC_042671.1/MH410121.1	84	2019-06-25T00:00:00Z
Centotheca lappacea	Eukaryota;Plants;Land Plants			PRJNA262798	0.139464	38.6207	plastid	NC_025229.1/KJ920225.1	85	2014-10-04T00:00:00Z
Ferrocalamus rimosivaginus	Eukaryota;Plants;Land Plants			PRJNA70105	0.139467	38.8644	plastid	NC_015831.1/HQ337794.1	84	2011-07-15T00:00:00Z
Hyparrhenia variabilis	Eukaryota;Plants;Land Plants			PRJNA509800	0.139481	38.4963	chloroplast	NC_040112.1/MH181202.1	83	2018-12-14T00:00:00Z
Bambusa emeiensis	Eukaryota;Plants;Land Plants			PRJNA70103	0.139493	38.9095	chloroplast	NC_015830.1/HQ337797.1	84	2011-07-15T00:00:00Z
Arundinaria tecta	Eukaryota;Plants;Land Plants			PRJNA244229	0.139499	38.9157	chloroplast	NC_023935.1/KC817463.1	82	2014-04-09T00:00:00Z
Chimonobambusa tumidissinoda	Eukaryota;Plants;Land Plants			PRJNA433135	0.139502	38.9106	plastid	NC_036814.1/MF066244.1	83	2018-02-06T00:00:00Z
Himalayacalamus collaris	Eukaryota;Plants;Land Plants			PRJNA555955	0.139515	38.8818	chloroplast	NC_043941.1/MH988731.1	84	2019-07-22T00:00:00Z
Fargesia nitida	Eukaryota;Plants;Land Plants			PRJNA259482	0.139535	38.8956	chloroplast	NC_024715.1/JX513416.1	83	2014-08-27T00:00:00Z
Arundinaria appalachiana	Eukaryota;Plants;Land Plants			PRJNA244230	0.139547	38.908	chloroplast	NC_023934.1/KC817462.1	83	2014-04-09T00:00:00Z
Ampelocalamus melicoideus	Eukaryota;Plants;Land Plants			PRJNA555962	0.139552	38.8902	chloroplast	NC_043932.1/MH988718.1	84	2019-07-22T00:00:00Z
Bergbambos tessellata	Eukaryota;Plants;Land Plants			PRJNA433152	0.139564	38.8847	plastid	NC_036816.1/MF066246.1	82	2018-02-06T00:00:00Z
Yushania brevipaniculata	Eukaryota;Plants;Land Plants			PRJNA555949	0.139568	38.8907	chloroplast	NC_043894.1/MH988738.1	84	2019-07-22T00:00:00Z
Tricholaena monachne	Eukaryota;Plants;Land Plants			PRJNA430590	0.13957	38.4309	chloroplast	NC_036706.1/KY432799.1	83	2018-01-18T00:00:00Z
Fargesia edulis	Eukaryota;Plants;Land Plants			PRJNA555977	0.139572	38.8946	chloroplast	NC_043945.1/MH988735.1	84	2019-07-22T00:00:00Z
Fargesia fungosa	Eukaryota;Plants;Land Plants			PRJNA555976	0.139582	38.8983	chloroplast	NC_043937.1/MH988726.1	84	2019-07-22T00:00:00Z
Alloteropsis paniculata	Eukaryota;Plants;Land Plants			PRJNA356581	0.139586	38.5848	chloroplast	NC_032078.1/KX752089.1	83	2016-12-07T00:00:00Z
Themeda villosa	Eukaryota;Plants;Land Plants			PRJNA390373	0.139589	38.493	chloroplast	NC_035021.1/KY596131.1	83	2017-06-13T00:00:00Z
Echinochloa ugandensis	Eukaryota;Plants;Land Plants			PRJNA414846	0.139592	38.6369	chloroplast	NC_036127.1/MF563380.1	82	2017-10-18T00:00:00Z
Himalayacalamus gyirongensis	Eukaryota;Plants;Land Plants			PRJNA555930	0.139592	38.8539	chloroplast	NC_043943.1/MH988733.1	84	2019-07-22T00:00:00Z
Echinochloa frumentacea	Eukaryota;Plants;Land Plants			PRJNA317890	0.139593	38.6366	chloroplast	NC_029827.1/KU242342.1	87	2016-04-09T00:00:00Z
Axonopus ramosus	Eukaryota;Plants;Land Plants			PRJNA414865	0.139596	38.5863	chloroplast	NC_036129.1/MF563383.1	82	2017-10-18T00:00:00Z
Drepanostachyum falcatum	Eukaryota;Plants;Land Plants			PRJNA439117	0.139596	38.8822	chloroplast	NC_037167.1/MF460981.1	85	2018-03-23T00:00:00Z
Oldeania alpina	Eukaryota;Plants;Land Plants			PRJNA433148	0.139599	38.8943	plastid	NC_036813.1/MF066243.1	83	2018-02-06T00:00:00Z
Fargesia grossa	Eukaryota;Plants;Land Plants			PRJNA555956	0.139601	38.8887	chloroplast	NC_043944.1/MH988734.1	84	2019-07-22T00:00:00Z
Yushania confusa	Eukaryota;Plants;Land Plants			PRJNA555983	0.139601	38.8951	chloroplast	NC_043893.1/MH988737.1	84	2019-07-22T00:00:00Z
Fargesia hygrophila	Eukaryota;Plants;Land Plants			PRJNA555964	0.139602	38.9013	chloroplast	NC_043938.1/MH988727.1	84	2019-07-22T00:00:00Z
Fargesia communis	Eukaryota;Plants;Land Plants			PRJNA555978	0.139605	38.8969	chloroplast	NC_043934.1/MH988721.1	84	2019-07-22T00:00:00Z
Yushania violascens	Eukaryota;Plants;Land Plants			PRJNA555953	0.139605	38.8976	chloroplast	NC_043946.1/MH988739.1	84	2019-07-22T00:00:00Z
Bambusa bambos	Eukaryota;Plants;Land Plants			PRJNA283092	0.139606	38.9245	plastid	NC_026957.1/KJ870988.1	83	2015-05-05T00:00:00Z
Fargesia canaliculata	Eukaryota;Plants;Land Plants			PRJNA555959	0.139606	38.8937	chloroplast	NC_043936.1/MH988725.1	84	2019-07-22T00:00:00Z
Fargesia yunnanensis	Eukaryota;Plants;Land Plants			PRJNA259446	0.139609	38.8965	chloroplast	NC_024717.1/JX513418.1	83	2014-08-27T00:00:00Z
Fargesia albocerea	Eukaryota;Plants;Land Plants			PRJNA555969	0.139617	38.8921	chloroplast	NC_043891.1/MH988728.1	84	2019-07-22T00:00:00Z
Ampelocalamus saxatilis	Eukaryota;Plants;Land Plants			PRJNA555931	0.139618	38.8933	chloroplast	NC_043931.1/MH988717.1	84	2019-07-22T00:00:00Z
Indocalamus sinicus	Eukaryota;Plants;Land Plants			PRJNA433122	0.139619	38.8951	plastid	NC_036819.1/MF066250.1	83	2018-02-06T00:00:00Z
Yushania glandulosa	Eukaryota;Plants;Land Plants			PRJNA555954	0.139621	38.891	chloroplast	NC_043947.1/MH988740.1	84	2019-07-22T00:00:00Z
Fargesia funiushanensis	Eukaryota;Plants;Land Plants			PRJNA555957	0.139622	38.8922	chloroplast	NC_043940.1/MH988730.1	84	2019-07-22T00:00:00Z
Fargesia stenoclada	Eukaryota;Plants;Land Plants			PRJNA555929	0.139622	38.8936	chloroplast	NC_043935.1/MH988723.1	84	2019-07-22T00:00:00Z
Garnotia tenella	Eukaryota;Plants;Land Plants			PRJNA390380	0.139629	38.3896	chloroplast	NC_035051.1/KY596184.1	81	2017-06-13T00:00:00Z
Sarocalamus faberi	Eukaryota;Plants;Land Plants			PRJNA259469	0.139629	38.8881	chloroplast	NC_024713.1/JX513414.1	84	2014-08-27T00:00:00Z
Yushania levigata	Eukaryota;Plants;Land Plants			PRJNA259444	0.139633	38.897	chloroplast	NC_024725.1/JX513426.1	83	2014-08-27T00:00:00Z
Fargesia qinlingensis	Eukaryota;Plants;Land Plants			PRJNA508179	0.13964	38.8922	chloroplast	NC_040002.1/MH117939.1	83	2018-12-03T00:00:00Z
Pseudosasa japonica	Eukaryota;Plants;Land Plants			PRJNA301315	0.139641	38.8933	chloroplast	NC_028328.1/KT428377.1	77	2015-11-05T00:00:00Z
Fargesia decurvata	Eukaryota;Plants;Land Plants			PRJNA555950	0.139642	38.8859	chloroplast	NC_043933.1/MH988719.1	84	2019-07-22T00:00:00Z
Iseilema macratherum	Eukaryota;Plants;Land Plants			PRJNA328826	0.139643	38.4688	chloroplast	NC_030611.1/KU291468.1	83	2016-07-13T00:00:00Z
Oligostachyum shiuyingianum	Eukaryota;Plants;Land Plants			PRJNA259450	0.139647	38.9153	chloroplast	NC_024722.1/JX513423.1	82	2014-08-27T00:00:00Z
Oldeania cf. madagascariensis PFM-2018	Eukaryota;Plants;Land Plants			PRJNA433145	0.139649	38.8388	plastid	NC_036823.1/MF066254.1	83	2018-02-06T00:00:00Z
Fargesia daminiu	Eukaryota;Plants;Land Plants			PRJNA555958	0.139652	38.8294	chloroplast	NC_043942.1/MH988732.1	84	2019-07-22T00:00:00Z
Fargesia setosa	Eukaryota;Plants;Land Plants			PRJNA555963	0.139653	38.9007	chloroplast	NC_043939.1/MH988729.1	84	2019-07-22T00:00:00Z
Indosasa sinica	Eukaryota;Plants;Land Plants			PRJNA259468	0.13966	38.8988	chloroplast	NC_024721.1/JX513422.1	82	2014-08-27T00:00:00Z
Garnotia thailandica	Eukaryota;Plants;Land Plants			PRJNA390385	0.139668	38.381	chloroplast	NC_035042.1/KY596171.1	82	2017-06-13T00:00:00Z
Indocalamus longiauritus	Eukaryota;Plants;Land Plants			PRJNA70047	0.139668	38.9058	plastid	NC_015803.1/HQ337795.1	82	2011-07-14T00:00:00Z
Phyllostachys edulis	Eukaryota;Plants;Land Plants			PRJNA70075	0.139679	38.8834	chloroplast	NC_015817.1/HQ337796.1	84	2011-07-15T00:00:00Z
Ampelocalamus calcareus	Eukaryota;Plants;Land Plants			PRJNA259460	0.139689	38.8413	plastid	NC_024731.1/KJ496369.1	83	2014-08-27T00:00:00Z
Pseudosasa cantorii	Eukaryota;Plants;Land Plants			PRJNA433130	0.139689	38.8964	plastid	NC_036824.1/MF066255.1	82	2018-02-06T00:00:00Z
Schizachyrium cirratum	Eukaryota;Plants;Land Plants			PRJNA509831	0.139692	38.4897	chloroplast	NC_040130.1/MH181235.1	83	2018-12-14T00:00:00Z
Arundinaria fargesii	Eukaryota;Plants;Land Plants			PRJNA259471	0.139696	38.8801	chloroplast	NC_024712.1/JX513413.1	83	2014-08-27T00:00:00Z
Acidosasa purpurea	Eukaryota;Plants;Land Plants			PRJNA70081	0.139697	38.897	chloroplast	NC_015820.1/HQ337793.1	82	2011-07-15T00:00:00Z
Pleioblastus amarus	Eukaryota;Plants;Land Plants			PRJNA555913	0.139703	38.9075	chloroplast	NC_043892.1/MH988736.1	84	2019-07-22T00:00:00Z
Phyllostachys propinqua	Eukaryota;Plants;Land Plants			PRJNA81307	0.139704	38.8758	chloroplast	NC_016699.1/JN415113.1	83	2012-01-27T00:00:00Z
Cymbopogon citratus	Eukaryota;Plants;Land Plants			PRJNA541620	0.139708	38.4624	chloroplast	NC_042144.1/MH488954.1	90	2019-05-12T00:00:00Z
Indosasa shibataeoides	Eukaryota;Plants;Land Plants			PRJNA433136	0.139711	38.8982	plastid	NC_036820.1/MF066251.1	82	2018-02-06T00:00:00Z
Andropogon gerardi	Eukaryota;Plants;Land Plants			PRJNA509812	0.139712	38.4885	chloroplast	NC_040111.1/MH181178.1	83	2018-12-14T00:00:00Z
Gelidocalamus tessellatus	Eukaryota;Plants;Land Plants			PRJNA259452	0.139712	38.8857	chloroplast	NC_024719.1/JX513420.1	83	2014-08-27T00:00:00Z
Cymbopogon flexuosus	Eukaryota;Plants;Land Plants			PRJNA390372	0.139715	38.4626	chloroplast	NC_035040.1/KY596169.1	83	2017-06-13T00:00:00Z
Echinochloa colona	Eukaryota;Plants;Land Plants			PRJNA359063	0.139719	38.6383	chloroplast	NC_032383.1/KX870853.1	87	2016-12-27T00:00:00Z
Pleioblastus maculatus	Eukaryota;Plants;Land Plants			PRJNA259466	0.13972	38.8999	chloroplast	NC_024723.1/JX513424.1	82	2014-08-27T00:00:00Z
Plagiantha tenella	Eukaryota;Plants;Land Plants			PRJNA328849	0.139722	38.5344	chloroplast	NC_030497.1/KU291480.1	83	2016-07-13T00:00:00Z
Phyllostachys sulphurea	Eukaryota;Plants;Land Plants			PRJNA257626	0.139731	38.889	chloroplast	NC_024669.1/KJ722540.1	85	2014-08-06T00:00:00Z
Shibataea chiangshanensis	Eukaryota;Plants;Land Plants			PRJNA433141	0.139737	38.8666	plastid	NC_036826.1/MF066257.1	83	2018-02-06T00:00:00Z
Zeugites pittieri	Eukaryota;Plants;Land Plants			PRJNA328835	0.139738	38.6044	chloroplast	NC_030500.1/KU291488.1	83	2016-07-13T00:00:00Z
Themeda arundinacea	Eukaryota;Plants;Land Plants			PRJNA390374	0.139742	38.4766	chloroplast	NC_035014.1/KY596123.1	83	2017-06-13T00:00:00Z
Oldeania itremoensis	Eukaryota;Plants;Land Plants			PRJNA433142	0.139751	38.8262	plastid	NC_036821.1/MF066252.1	83	2018-02-06T00:00:00Z
Brachiaria fragrans	Eukaryota;Plants;Land Plants			PRJNA376947	0.139753	38.7255	chloroplast	NC_033879.1/KX663837.1	82	2017-02-27T00:00:00Z
Schizachyrium imberbe	Eukaryota;Plants;Land Plants			PRJNA390362	0.139759	38.4762	chloroplast	NC_035045.1/KY596174.1	83	2017-06-13T00:00:00Z
Fargesia spathacea	Eukaryota;Plants;Land Plants			PRJNA259481	0.139767	38.8797	chloroplast	NC_024716.1/JX513417.1	83	2014-08-27T00:00:00Z
Ampelocalamus actinotrichus	Eukaryota;Plants;Land Plants			PRJNA433153	0.139774	38.8728	plastid	NC_036815.1/MF066245.1	82	2018-02-06T00:00:00Z
Thamnocalamus spathiflorus	Eukaryota;Plants;Land Plants			PRJNA259484	0.139778	38.8387	chloroplast	NC_024724.1/JX513425.1	83	2014-08-27T00:00:00Z
Germainia capitata	Eukaryota;Plants;Land Plants			PRJNA390383	0.139817	38.4925	chloroplast	NC_035046.1/KY596175.1	83	2017-06-13T00:00:00Z
Chimonocalamus longiusculus	Eukaryota;Plants;Land Plants			PRJNA259453	0.139821	38.8668	chloroplast	NC_024714.1/JX513415.1	82	2014-08-27T00:00:00Z
Panicum miliaceum	Eukaryota;Plants;Land Plants			PRJNA316270	0.139826	38.6058	plastid	NC_029732.1/KU343177.1	87	2016-03-28T00:00:00Z
Phyllostachys nigra var. henonis	Eukaryota;Plants;Land Plants			PRJNA70093	0.139839	38.9047	chloroplast	NC_015826.1/HQ154129.1	84	2011-07-15T00:00:00Z
Echinochloa esculenta	Eukaryota;Plants;Land Plants			PRJNA359009	0.139851	38.6325	chloroplast	NC_032379.1/KX756178.1	83	2016-12-27T00:00:00Z
Echinochloa crus-galli	Eukaryota;Plants;Land Plants			PRJNA306336	0.139857	38.628	chloroplast	NC_028719.1/KR822684.1	122	2015-12-17T00:00:00Z
Arthraxon microphyllus	Eukaryota;Plants;Land Plants			PRJNA390388	0.139858	38.2853	chloroplast	NC_035050.1/KY596183.1	82	2017-06-13T00:00:00Z
Ampelocalamus naibunensis	Eukaryota;Plants;Land Plants			PRJNA339102	0.13986	38.8667	chloroplast	NC_030767.1/KX372537.1	82	2016-08-16T00:00:00Z
Oncorachis ramosa	Eukaryota;Plants;Land Plants			PRJNA328848	0.139873	38.5335	chloroplast	NC_030490.1/KU291472.1	83	2016-07-13T00:00:00Z
Echinochloa stagnina	Eukaryota;Plants;Land Plants			PRJNA414818	0.139886	38.6343	chloroplast	NC_036128.1/MF563381.1	82	2017-10-18T00:00:00Z
Eriochloa meyeriana	Eukaryota;Plants;Land Plants			PRJNA328832	0.13989	38.4238	chloroplast	NC_030624.1/KU291498.1	83	2016-07-13T00:00:00Z
Echinochloa oryzicola STB03	Eukaryota;Plants;Land Plants			PRJNA257603	0.139891	38.6322	chloroplast	NC_024643.2/KJ000048.2	82	2014-08-06T00:00:00Z
Coleataenia prionitis	Eukaryota;Plants;Land Plants			PRJNA262788	0.139897	38.6606	plastid	NC_025231.1/KJ920228.1	85	2014-10-04T00:00:00Z
Steinchisma laxum	Eukaryota;Plants;Land Plants			PRJNA328851	0.139902	38.5284	chloroplast	NC_030499.1/KU291483.1	83	2016-07-13T00:00:00Z
Sasa longiligulata	Eukaryota;Plants;Land Plants			PRJNA433127	0.139928	38.8407	plastid	NC_036825.1/MF066256.1	83	2018-02-06T00:00:00Z
Amelichloa brachychaeta	Eukaryota;Plants;Land Plants			PRJNA550914	0.139946	38.8528	plastid	NC_042701.1/MH569074.1	83	2019-06-25T00:00:00Z
Indocalamus wilsonii	Eukaryota;Plants;Land Plants			PRJNA259451	0.139962	38.7962	chloroplast	NC_024720.1/JX513421.1	83	2014-08-27T00:00:00Z
Chrysopogon zizanioides	Eukaryota;Plants;Land Plants			PRJNA390398	0.139971	38.4544	chloroplast	NC_035034.1/KY596158.1	83	2017-06-13T00:00:00Z
Kuruna debilis	Eukaryota;Plants;Land Plants			PRJNA433151	0.139971	38.793	plastid	NC_036822.1/MF066253.1	82	2018-02-06T00:00:00Z
Panicum incomtum	Eukaryota;Plants;Land Plants			PRJNA496110	0.139999	38.6817	chloroplast	NC_039619.1/MH394348.1	85	2018-11-06T00:00:00Z
Genlisea aurea	Eukaryota;Plants;Land Plants			PRJNA438327	0.14001	38.4615	chloroplast	NC_037078.1/MF593121.1	76	2018-03-14T00:00:00Z
Arundinaria humbertii	Eukaryota;Plants;Land Plants			PRJNA563421	0.140032	38.7883	chloroplast	NC_044488.1/MF508721.1	82	2019-09-06T00:00:00Z
Chrysopogon gryllus	Eukaryota;Plants;Land Plants			PRJNA390379	0.140034	38.4464	chloroplast	NC_035035.1/KY596161.1	83	2017-06-13T00:00:00Z
Sphagnum palustre	Eukaryota;Plants;Land Plants			PRJNA322156	0.14004	36.8738	chloroplast	NC_030198.1/KU726621.1	84	2016-05-19T00:00:00Z
Oldeania humbertii	Eukaryota;Plants;Land Plants			PRJNA433144	0.140047	38.7884	plastid	NC_036817.1/MF066247.1	83	2018-02-06T00:00:00Z
Panicum miliaceum	Eukaryota;Plants;Land Plants		SAMN08389585	PRJNA431363	0.140048	38.5589	chloroplast	Pltd:CM009689.1	68	2018-04-10T00:00:00Z
Gaoligongshania megalothyrsa	Eukaryota;Plants;Land Plants			PRJNA259485	0.140064	38.9115	chloroplast	NC_024718.1/JX513419.1	83	2014-08-27T00:00:00Z
Otachyrium versicolor	Eukaryota;Plants;Land Plants			PRJNA328852	0.140081	38.5027	chloroplast	NC_030492.1/KU291474.1	83	2016-07-13T00:00:00Z
Thysanolaena latifolia	Eukaryota;Plants;Land Plants			PRJNA262805	0.140097	38.7253	plastid	NC_025238.1/KJ920236.1	85	2014-10-04T00:00:00Z
Sacciolepis indica	Eukaryota;Plants;Land Plants			PRJNA430663	0.140118	38.4997	chloroplast	NC_036702.1/KY432794.1	85	2018-01-18T00:00:00Z
Heteropogon triticeus	Eukaryota;Plants;Land Plants			PRJNA390378	0.14012	38.5013	chloroplast	NC_035025.1/KY596142.1	83	2017-06-13T00:00:00Z
Pariana campestris	Eukaryota;Plants;Land Plants			PRJNA289829	0.14012	38.9116	plastid	NC_027491.1/KP319244.1	83	2015-07-14T00:00:00Z
Dichanthelium acuminatum	Eukaryota;Plants;Land Plants			PRJNA328841	0.140122	38.6513	chloroplast	NC_030623.1/KU291496.1	83	2016-07-13T00:00:00Z
Eriochrysis laxa	Eukaryota;Plants;Land Plants			PRJNA318212	0.140135	38.4272	chloroplast	NC_029883.1/KU961863.1	85	2016-04-12T00:00:00Z
Urochloa reptans	Eukaryota;Plants;Land Plants			PRJNA328844	0.140177	38.5063	chloroplast	NC_030617.1/KU291486.1	83	2016-07-13T00:00:00Z
Eulalia aurea (Bory) Kunth, 1830	Eukaryota;Plants;Land Plants			PRJNA328846	0.14022	38.4731	chloroplast	NC_030503.1/KU291499.1	83	2016-07-13T00:00:00Z
Apluda mutica	Eukaryota;Plants;Land Plants			PRJNA430579	0.140299	38.45	plastid	NC_036684.1/KY432813.1	85	2018-01-18T00:00:00Z
Genlisea filiformis	Eukaryota;Plants;Land Plants			PRJNA438319	0.140308	38.6756	chloroplast	NC_037079.1/MF593122.1	75	2018-03-14T00:00:00Z
Paspalum inaequivalve	Eukaryota;Plants;Land Plants			PRJNA495535	0.140312	38.5826	chloroplast	NC_039463.1/MG524001.1	83	2018-10-10T00:00:00Z
Rottboellia cochinchinensis	Eukaryota;Plants;Land Plants			PRJNA328840	0.140336	38.4028	chloroplast	NC_030615.1/KU291481.1	83	2016-07-13T00:00:00Z
Puelia olyriformis	Eukaryota;Plants;Land Plants			PRJNA238399	0.140344	38.9735	chloroplast	NC_023449.1/KC534841.1	86	2014-02-21T00:00:00Z
Parahyparrhenia siamensis	Eukaryota;Plants;Land Plants			PRJNA390363	0.140355	38.3934	chloroplast	NC_035033.1/KY596155.1	83	2017-06-13T00:00:00Z
Pariana radiciflora	Eukaryota;Plants;Land Plants			PRJNA283084	0.140361	38.9054	plastid	NC_026972.1/KJ871004.1	80	2015-05-05T00:00:00Z
Chasechloa egregia	Eukaryota;Plants;Land Plants			PRJNA344585	0.140371	38.5892	chloroplast	NC_031299.1/KX663836.1	82	2016-09-27T00:00:00Z
Arthraxon lanceolatus	Eukaryota;Plants;Land Plants			PRJNA390341	0.140381	38.283	chloroplast	NC_035017.1/KY596127.1	82	2017-06-13T00:00:00Z
Eriochrysis pallida	Eukaryota;Plants;Land Plants			PRJNA550821	0.140382	38.3888	chloroplast	NC_042751.1/MH767450.1	83	2019-06-25T00:00:00Z
Zea mays	Eukaryota;Plants;Land Plants			PRJNA249074	0.140384	38.4624	chloroplast	Pltd:NC_001666.2/	111	1995-07-17T00:00:00Z
Eriochrysis cf. cayennensis 365-2	Eukaryota;Plants;Land Plants			PRJNA318208	0.140426	38.4039	chloroplast	NC_029882.1/KU961862.1	85	2016-04-12T00:00:00Z
Lasiacis nigra	Eukaryota;Plants;Land Plants			PRJNA414811	0.140431	38.6368	chloroplast	NC_036123.1/MF563376.1	82	2017-10-18T00:00:00Z
Genlisea repens	Eukaryota;Plants;Land Plants			PRJNA438324	0.140432	38.5439	chloroplast	NC_037081.1/MF593124.1	76	2018-03-14T00:00:00Z
Paspalum vaginatum	Eukaryota;Plants;Land Plants			PRJNA495547	0.140451	38.6419	chloroplast	NC_039462.1/MG523998.1	83	2018-10-10T00:00:00Z
Gynerium sagittatum	Eukaryota;Plants;Land Plants			PRJNA430603	0.140453	38.7631	chloroplast	NC_036687.1/KY432779.1	85	2018-01-18T00:00:00Z
Genlisea pygmaea	Eukaryota;Plants;Land Plants			PRJNA438320	0.140466	38.5524	chloroplast	NC_037080.1/MF593123.1	75	2018-03-14T00:00:00Z
Pseudosorghum fasciculare	Eukaryota;Plants;Land Plants			PRJNA390404	0.140474	38.3993	chloroplast	NC_035024.1/KY596139.1	83	2017-06-13T00:00:00Z
Pseudolasiacis leptolomoides	Eukaryota;Plants;Land Plants			PRJNA414856	0.14048	38.6276	chloroplast	NC_036119.1/MF563372.1	82	2017-10-18T00:00:00Z
Arthraxon prionodes	Eukaryota;Plants;Land Plants			PRJNA328855	0.140486	38.2729	chloroplast	NC_030613.1/KU291471.1	83	2016-07-13T00:00:00Z
Arthraxon hispidus	Eukaryota;Plants;Land Plants			PRJNA390351	0.140507	38.2792	chloroplast	NC_035048.1/KY596179.1	82	2017-06-13T00:00:00Z
Selaginella bisulcata	Eukaryota;Plants;Land Plants			PRJNA532031	0.140509	52.7746	chloroplast	NC_041640.1/MH598531.1	62	2019-04-10T00:00:00Z
Streptostachys asperifolia	Eukaryota;Plants;Land Plants			PRJNA414854	0.140576	38.5855	chloroplast	NC_036116.1/MF563369.1	82	2017-10-18T00:00:00Z
Zea diploperennis	Eukaryota;Plants;Land Plants			PRJNA326015	0.140608	38.5789	plastid	NC_030377.1/KR873421.1	82	2016-06-17T00:00:00Z
Dimeria ornithopoda	Eukaryota;Plants;Land Plants			PRJNA390381	0.140629	38.3939	chloroplast	NC_035020.1/KY596130.1	83	2017-06-13T00:00:00Z
Sorghum timorense	Eukaryota;Plants;Land Plants			PRJNA241202	0.140629	38.5049	chloroplast	NC_023800.1/KF998272.1	84	2014-03-20T00:00:00Z
Eulalia siamensis	Eukaryota;Plants;Land Plants			PRJNA390375	0.140642	38.507	chloroplast	NC_035031.1/KY596149.1	83	2017-06-13T00:00:00Z
Sorghum propinquum	Eukaryota;Plants;Land Plants			PRJNA550841	0.140642	38.4814	chloroplast	NC_042789.1/MH926027.1	84	2019-06-25T00:00:00Z
Thyridolepis xerophila	Eukaryota;Plants;Land Plants			PRJNA328856	0.140644	38.6515	chloroplast	NC_030616.1/KU291485.1	83	2016-07-13T00:00:00Z
Zea perennis	Eukaryota;Plants;Land Plants			PRJNA325262	0.140647	38.4452	plastid	NC_030300.1/KR873423.1	83	2016-06-10T00:00:00Z
Dendrotrophe varians	Eukaryota;Plants;Land Plants			PRJNA495566	0.140666	37.8307	chloroplast	NC_039391.1/MF592987.1	72	2018-10-10T00:00:00Z
Genlisea tuberosa	Eukaryota;Plants;Land Plants			PRJNA438332	0.140677	38.4612	chloroplast	NC_037082.1/MF593125.1	76	2018-03-14T00:00:00Z
Chrysopogon serrulatus	Eukaryota;Plants;Land Plants			PRJNA318202	0.1407	38.3753	chloroplast	NC_029884.1/KU961864.1	84	2016-04-12T00:00:00Z
Alloteropsis angusta	Eukaryota;Plants;Land Plants			PRJNA297997	0.140709	38.4332	chloroplast	NC_027951.1/KT281146.1	84	2015-10-07T00:00:00Z
Zea luxurians	Eukaryota;Plants;Land Plants			PRJNA325263	0.14071	38.4365	plastid	NC_030301.1/KR873424.1	83	2016-06-10T00:00:00Z
Chrysopogon orientalis	Eukaryota;Plants;Land Plants			PRJNA390382	0.140712	38.3677	chloroplast	NC_035047.1/KY596177.1	83	2017-06-13T00:00:00Z
Cenchrus americanus	Eukaryota;Plants;Land Plants		SAMN02415033	PRJNA251643	0.140718	38.521	plastid	chloroplast:NC_024171.1/	88	2014-06-09T00:00:00Z
Entolasia imbricata	Eukaryota;Plants;Land Plants			PRJNA414803	0.140721	38.5301	chloroplast	NC_036126.1/MF563379.1	82	2017-10-18T00:00:00Z
Paraneurachne muelleri	Eukaryota;Plants;Land Plants			PRJNA495511	0.140732	38.5563	chloroplast	NC_039450.1/MG524000.1	83	2018-10-10T00:00:00Z
Pseudopogonatherum contortum	Eukaryota;Plants;Land Plants			PRJNA390359	0.140738	38.4217	chloroplast	NC_035026.1/KY596143.1	83	2017-06-13T00:00:00Z
Coix lacryma-jobi	Eukaryota;Plants;Land Plants			PRJNA40757	0.140745	38.4603	chloroplast	NC_013273.1/FJ261955.1	104	2009-10-07T00:00:00Z
Sorghum bicolor	Eukaryota;Plants;Land Plants			PRJNA38691	0.140754	38.4913	chloroplast	Pltd:NC_008602.1/	84	2006-12-04T00:00:00Z
Sorghum sudanense	Eukaryota;Plants;Land Plants			PRJNA550830	0.140755	38.491	chloroplast	NC_042790.1/MH926028.1	84	2019-06-25T00:00:00Z
Streptogyna americana	Eukaryota;Plants;Land Plants			PRJNA430606	0.140761	39.1081	chloroplast	NC_036683.1/KY432812.1	81	2018-01-18T00:00:00Z
Hemisorghum mekongense	Eukaryota;Plants;Land Plants			PRJNA390384	0.140765	38.4904	chloroplast	NC_035022.1/KY596132.1	83	2017-06-13T00:00:00Z
Mnesithea helferi	Eukaryota;Plants;Land Plants			PRJNA390364	0.140801	38.3591	chloroplast	NC_035036.1/KY596162.1	83	2017-06-13T00:00:00Z
Arundinella deppeana	Eukaryota;Plants;Land Plants			PRJNA328834	0.140804	38.3732	chloroplast	NC_030620.1/KU291490.1	83	2016-07-13T00:00:00Z
Paspalum fimbriatum	Eukaryota;Plants;Land Plants			PRJNA328845	0.140804	38.7432	chloroplast	NC_030495.1/KU291478.1	83	2016-07-13T00:00:00Z
Amphicarpum muhlenbergianum	Eukaryota;Plants;Land Plants			PRJNA328827	0.14081	38.6194	chloroplast	NC_030619.1/KU291489.1	83	2016-07-13T00:00:00Z
Imperata cylindrica	Eukaryota;Plants;Land Plants			PRJNA328829	0.140831	38.4532	chloroplast	NC_030487.1/KU291466.1	83	2016-07-13T00:00:00Z
Polytoca digitata	Eukaryota;Plants;Land Plants			PRJNA390376	0.140892	38.3918	chloroplast	NC_035044.1/KY596173.1	82	2017-06-13T00:00:00Z
Andropogon burmanicus	Eukaryota;Plants;Land Plants			PRJNA390389	0.140898	38.3866	chloroplast	NC_035038.1/KY596164.1	83	2017-06-13T00:00:00Z
Saccharum hildebrandtii	Eukaryota;Plants;Land Plants			PRJNA414830	0.140901	38.4518	chloroplast	NC_036118.1/MF563371.1	82	2017-10-18T00:00:00Z
Digitaria exilis	Eukaryota;Plants;Land Plants		SAMN02415020	PRJNA251642	0.140908	38.4719	plastid	NC_024176.1/	85	2014-06-09T00:00:00Z
Panicum pygmaeum	Eukaryota;Plants;Land Plants			PRJNA414873	0.140996	38.6429	chloroplast	NC_036120.1/MF563373.1	82	2017-10-18T00:00:00Z
Tripsacum dactyloides	Eukaryota;Plants;Land Plants			PRJNA438322	0.14105	38.4169	chloroplast	NC_037087.1/MG386499.1	74	2018-03-14T00:00:00Z
Sorghastrum nutans	Eukaryota;Plants;Land Plants			PRJNA328830	0.141061	38.3621	chloroplast	NC_030498.1/KU291482.1	83	2016-07-13T00:00:00Z
Eulaliopsis binata	Eukaryota;Plants;Land Plants			PRJNA390324	0.141091	38.3674	chloroplast	NC_035049.1/KY596182.1	83	2017-06-13T00:00:00Z
Ischaemum afrum	Eukaryota;Plants;Land Plants			PRJNA328858	0.141097	38.3623	chloroplast	NC_030488.1/KU291467.1	83	2016-07-13T00:00:00Z
Miscanthus junceus	Eukaryota;Plants;Land Plants			PRJNA400930	0.141149	38.4225	chloroplast	NC_035751.1/LN869216.1	106	2017-08-11T00:00:00Z
Saccharum spontaneum	Eukaryota;Plants;Land Plants			PRJNA387892	0.141168	38.4492	chloroplast	NC_034802.1/KX139746.1	76	2017-05-24T00:00:00Z
Saccharum officinarum	Eukaryota;Plants;Land Plants			PRJNA394356	0.141176	38.4449	chloroplast	NC_035224.1/LN849913.1	106	2017-06-29T00:00:00Z
Saccharum hybrid cultivar	Eukaryota;Plants;Land Plants			PRJNA311782	0.141181	38.4386	chloroplast	NC_029221.1/KU214867.1	82	2016-02-12T00:00:00Z
Saccharum hybrid cultivar SP80-3280	Eukaryota;Plants;Land Plants			PRJNA62917	0.141182	38.4383	chloroplast	NC_005878.2/AE009947.2	97	2004-06-09T00:00:00Z
Saccharum officinarum	Eukaryota;Plants;Land Plants			PRJNA12453	0.141182	38.4412	chloroplast	NC_006084.1/AP006714.1	117	2004-07-29T00:00:00Z
Corallorhiza striata var. striata	Eukaryota;Plants;Land Plants			PRJNA524599	0.141202	36.3437	plastid	NC_040978.1/MG874034.1	50	2019-02-27T00:00:00Z
Chasmanthium laxum	Eukaryota;Plants;Land Plants			PRJNA399909	0.141203	38.7322	chloroplast	NC_035522.1/MF035973.1	83	2017-08-24T00:00:00Z
Saccharum arundinaceum	Eukaryota;Plants;Land Plants			PRJNA339086	0.14121	38.4491	chloroplast	NC_030777.1/LC160130.1	87	2016-08-16T00:00:00Z
Tripidium ravennae	Eukaryota;Plants;Land Plants			PRJNA550957	0.141244	38.4363	chloroplast	NC_042735.1/MH767451.1	83	2019-06-25T00:00:00Z
Genlisea margaretae	Eukaryota;Plants;Land Plants			PRJNA267391	0.141255	38.3427	chloroplast	NC_025652.1/HG530134.1	56	2014-11-03T00:00:00Z
Miscanthus transmorrisonensis	Eukaryota;Plants;Land Plants			PRJNA400957	0.141266	38.3935	chloroplast	NC_035752.1/LN869229.1	106	2017-08-11T00:00:00Z
Miscanthus sacchariflorus	Eukaryota;Plants;Land Plants			PRJNA306338	0.141332	38.3841	chloroplast	NC_028720.1/KR822687.1	122	2015-12-17T00:00:00Z
Miscanthus x giganteus	Eukaryota;Plants;Land Plants			PRJNA400991	0.141345	38.399	chloroplast	NC_035753.1/LN869230.1	106	2017-08-11T00:00:00Z
Miscanthus floridulus	Eukaryota;Plants;Land Plants			PRJNA400946	0.141356	38.3875	chloroplast	NC_035750.1/LN869215.1	106	2017-08-11T00:00:00Z
Miscanthus sinensis	Eukaryota;Plants;Land Plants			PRJNA306337	0.141372	38.3895	chloroplast	NC_028721.1/KR822688.1	122	2015-12-17T00:00:00Z
Cressa cretica	Eukaryota;Plants;Land Plants			PRJNA400032	0.141419	38.5776	chloroplast	NC_035516.1/MF067398.1	82	2017-08-24T00:00:00Z
Aldrovanda vesiculosa	Eukaryota;Plants;Land Plants			PRJNA394436	0.141568	36.8699	chloroplast	NC_035416.1/KY679200.1	81	2017-07-14T00:00:00Z
Asteropeia rhopaloides	Eukaryota;Plants;Land Plants			PRJNA524566	0.141773	36.1853	plastid	NC_040948.1/MK397914.1	77	2019-02-27T00:00:00Z
Leptaspis banksii	Eukaryota;Plants;Land Plants			PRJNA377066	0.14181	38.565	chloroplast	NC_033863.1/KU666545.1	75	2017-02-27T00:00:00Z
Pharus lappulaceus	Eukaryota;Plants;Land Plants			PRJNA232905	0.141928	38.4286	chloroplast	NC_023245.1/KC311467.1	84	2014-01-02T00:00:00Z
Leptaspis zeylanica	Eukaryota;Plants;Land Plants			PRJNA377067	0.141946	38.4836	chloroplast	NC_033864.1/KU666546.1	75	2017-02-27T00:00:00Z
Heracleum candicans	Eukaryota;Plants;Land Plants			PRJNA591524	0.141948	37.3827	chloroplast	NC_045184.1/MK522402.1	81	2019-11-25T00:00:00Z
Pharus latifolius	Eukaryota;Plants;Land Plants			PRJNA207571	0.142077	38.375	chloroplast	NC_021372.1/JN032131.1	76	2013-06-10T00:00:00Z
Semenovia transiliensis	Eukaryota;Plants;Land Plants			PRJNA591538	0.142143	37.3638	chloroplast	NC_045182.1/MK333395.1	79	2019-11-25T00:00:00Z
Erodium gruinum	Eukaryota;Plants;Land Plants			PRJNA270438	0.142208	43.6241	plastid	NC_025907.1/KF804069.1	72	2014-12-22T00:00:00Z
Hymenophyllum holochilum	Eukaryota;Plants;Land Plants			PRJNA504201	0.142214	37.561	chloroplast	NC_039753.1/MH265124.1	86	2018-11-09T00:00:00Z
Angelica sinensis	Eukaryota;Plants;Land Plants			PRJNA550815	0.142485	37.491	chloroplast	NC_042826.1/MH778543.1	80	2019-06-25T00:00:00Z
Trifolium meduseum	Eukaryota;Plants;Land Plants			PRJNA248840	0.142595	34.4872	chloroplast	NC_024166.1/KJ476730.1	75	2014-06-09T00:00:00Z
Cephalotus follicularis	Eukaryota;Plants;Land Plants			PRJNA548736	0.142706	37.1463	plastid	NC_042597.1/MK460223.1	71	2019-06-13T00:00:00Z
Heracleum yunnanense	Eukaryota;Plants;Land Plants			PRJNA591523	0.142714	37.3201	chloroplast	NC_045183.1/MN365275.1	78	2019-11-25T00:00:00Z
Illicium anisatum	Eukaryota;Plants;Land Plants			PRJNA387983	0.142723	39.1696	plastid	NC_034703.1/	80	2017-05-25T00:00:00Z
Selaginella doederleinii	Eukaryota;Plants;Land Plants			PRJNA532073	0.142752	51.125	chloroplast	NC_041641.1/MH598532.1	76	2019-04-10T00:00:00Z
Paspalum virgatum	Eukaryota;Plants;Land Plants			PRJNA495534	0.142796	38.9983	chloroplast	NC_039449.1/MG523999.1	83	2018-10-10T00:00:00Z
Osmundastrum cinnamomeum	Eukaryota;Plants;Land Plants			PRJNA248842	0.142812	40.2305	chloroplast	NC_024157.1/KF225592.1	84	2014-06-09T00:00:00Z
Dioncophyllum thollonii	Eukaryota;Plants;Land Plants			PRJNA529160	0.14296	35.4239	plastid	NC_041276.1/MK397866.1	81	2019-03-26T00:00:00Z
Oberonia japonica	Eukaryota;Plants;Land Plants			PRJNA407176	0.142996	37.3682	chloroplast	NC_035832.1/KX871235.1	74	2017-09-13T00:00:00Z
Passiflora serratifolia	Eukaryota;Plants;Land Plants			PRJNA483637	0.143111	36.9182	chloroplast	NC_038129.1/MF807948.1	77	2018-07-31T00:00:00Z
Erycina pusilla	Eukaryota;Plants;Land Plants			PRJNA170298	0.143164	36.651	chloroplast	NC_018114.1/JF746994.1	73	2012-07-11T00:00:00Z
Illicium verum	Eukaryota;Plants;Land Plants			PRJNA387984	0.143187	39.1076	plastid	NC_034689.1/	79	2017-05-25T00:00:00Z
Illicium henryi	Eukaryota;Plants;Land Plants			PRJNA387985	0.14324	39.1273	plastid	NC_034699.1/	79	2017-05-25T00:00:00Z
Paspalum simplex	Eukaryota;Plants;Land Plants			PRJNA495549	0.143254	38.8855	chloroplast	NC_039461.1/MG523997.1	83	2018-10-10T00:00:00Z
Isoetes cangae	Eukaryota;Plants;Land Plants			PRJNA495520	0.14338	37.7082	chloroplast	NC_039392.1/MG019393.1	83	2018-10-10T00:00:00Z
Isoetes serracarajensis	Eukaryota;Plants;Land Plants			PRJNA495519	0.14338	37.7117	chloroplast	NC_039393.1/MG019395.1	83	2018-10-10T00:00:00Z
Genlisea violacea	Eukaryota;Plants;Land Plants			PRJNA438326	0.143416	38.5536	chloroplast	NC_037083.1/MF593126.1	78	2018-03-14T00:00:00Z
Pedicularis hallaisanensis	Eukaryota;Plants;Land Plants			PRJNA453252	0.143469	38.6523	chloroplast	NC_037433.1/MG770330.1	70	2018-04-24T00:00:00Z
Illicium floridanum	Eukaryota;Plants;Land Plants			PRJNA387961	0.143571	39.0427	plastid	NC_034685.1/	79	2017-05-25T00:00:00Z
Jasminum polyanthum	Eukaryota;Plants;Land Plants			PRJNA541605	0.143735	36.9903	chloroplast	NC_042273.1/MH817873.1	81	2019-05-12T00:00:00Z
Selaginella moellendorffii	Eukaryota;Plants;Land Plants			PRJNA39909	0.14378	51.0043	plastid	NC_013086.1/FJ755183.1	70	2009-08-14T00:00:00Z
Passiflora vitifolia	Eukaryota;Plants;Land Plants			PRJNA483610	0.143845	37.1845	chloroplast	NC_038128.1/MF807947.1	77	2018-07-31T00:00:00Z
Zostera marina	Eukaryota;Plants;Land Plants			PRJNA413494	0.143877	35.4567	chloroplast	NC_036014.1/MF370229.1	78	2017-10-06T00:00:00Z
Arracacia xanthorrhiza	Eukaryota;Plants;Land Plants			PRJNA359053	0.143989	37.4779	chloroplast	NC_032364.1/KY117235.1	71	2016-12-27T00:00:00Z
Strobilanthes cusia	Eukaryota;Plants;Land Plants			PRJNA453244	0.144133	38.2043	chloroplast	NC_037485.1/MG874806.1	84	2018-04-24T00:00:00Z
Selaginella uncinata	Eukaryota;Plants;Land Plants			PRJNA532124	0.144161	54.8838	chloroplast	NC_041575.1/MG272483.1	81	2019-04-10T00:00:00Z
Selaginella hainanensis	Eukaryota;Plants;Land Plants			PRJNA532144	0.144201	54.8318	chloroplast	NC_041642.1/MH598533.1	80	2019-04-10T00:00:00Z
Isoetes nuttallii	Eukaryota;Plants;Land Plants			PRJNA483624	0.14468	38.176	chloroplast	NC_038073.1/MG668899.1	84	2018-07-31T00:00:00Z
Trifolium subterraneum	Eukaryota;Plants;Land Plants			PRJNA33531	0.144763	34.399	chloroplast	NC_011828.1/EU849487.1	74	2009-01-06T00:00:00Z
Isoetes engelmannii	Eukaryota;Plants;Land Plants			PRJNA483620	0.144817	38.0487	chloroplast	NC_038080.1/MG668892.1	84	2018-07-31T00:00:00Z
Isoetes butleri	Eukaryota;Plants;Land Plants			PRJNA483630	0.144912	38.0217	chloroplast	NC_038071.1/MG668891.1	84	2018-07-31T00:00:00Z
Isoetes piedmontana	Eukaryota;Plants;Land Plants			PRJNA524577	0.14503	37.9852	plastid	NC_040925.1/MH549641.1	84	2019-02-27T00:00:00Z
Isoetes melanospora	Eukaryota;Plants;Land Plants			PRJNA483629	0.145045	37.9958	chloroplast	NC_038072.1/MG668897.1	84	2018-07-31T00:00:00Z
Isoetes mattaponica	Eukaryota;Plants;Land Plants			PRJNA504278	0.145065	37.9844	chloroplast	NC_039703.1/MG792141.1	84	2018-11-09T00:00:00Z
Isoetes graniticola	Eukaryota;Plants;Land Plants			PRJNA504284	0.145118	37.9946	chloroplast	NC_039821.1/MG792132.1	84	2018-11-09T00:00:00Z
Isoetes valida	Eukaryota;Plants;Land Plants			PRJNA483628	0.145132	37.9854	chloroplast	NC_038074.1/MG668902.1	84	2018-07-31T00:00:00Z
Eulophia zollingeri	Eukaryota;Plants;Land Plants			PRJNA439069	0.145201	36.8696	chloroplast	NC_037212.1/MG181954.1	76	2018-03-23T00:00:00Z
Pendulorchis himalaica	Eukaryota;Plants;Land Plants			PRJNA532021	0.145207	36.6477	plastid	NC_041513.1/MK442927.1	74	2019-04-10T00:00:00Z
Isoetes flaccida	Eukaryota;Plants;Land Plants			PRJNA60299	0.145303	37.9435	chloroplast	NC_014675.1/GU191333.1	84	2010-12-02T00:00:00Z
Scoliosorus ensiformis	Eukaryota;Plants;Land Plants			PRJNA514772	0.145327	40.029	chloroplast	NC_040218.1/MH173090.1	86	2019-01-11T00:00:00Z
Isoetes yunguiensis	Eukaryota;Plants;Land Plants			PRJNA527489	0.145355	37.9856	chloroplast	NC_041146.1/MK047605.1	84	2019-03-18T00:00:00Z
Kadsura coccinea	Eukaryota;Plants;Land Plants			PRJNA509859	0.145413	39.6931	chloroplast	NC_040116.1/MH029822.1	80	2018-12-14T00:00:00Z
Isoetes malinverniana	Eukaryota;Plants;Land Plants			PRJNA524613	0.145535	38.0025	plastid	NC_040924.1/MH549640.1	84	2019-02-27T00:00:00Z
Agathis dammara	Eukaryota;Plants;Land Plants			PRJNA232235	0.145625	36.5363	chloroplast	NC_023119.1/AB830884.1	81	2013-12-20T00:00:00Z
Wollemia nobilis	Eukaryota;Plants;Land Plants			PRJNA287403	0.14563	36.4904	chloroplast	NC_027235.1/KP259800.1	82	2015-06-18T00:00:00Z
Gentiana tongolensis	Eukaryota;Plants;Land Plants			PRJNA595222	0.145757	37.944	chloroplast	NC_045271.1/MK251985.1	84	2019-12-12T00:00:00Z
Allium paradoxum	Eukaryota;Plants;Land Plants			PRJNA504257	0.145819	37.1275	chloroplast	NC_039661.1/MH053150.1	68	2018-11-09T00:00:00Z
Holcoglossum sinicum	Eukaryota;Plants;Land Plants			PRJNA531979	0.145909	36.7434	plastid	NC_041518.1/MK442933.1	74	2019-04-10T00:00:00Z
Plantago lagopus	Eukaryota;Plants;Land Plants			PRJNA532075	0.145936	38.3182	chloroplast	NC_041420.1/MH205736.1	84	2019-04-10T00:00:00Z
Araucaria araucana	Eukaryota;Plants;Land Plants			PRJNA595290	0.146005	36.5727	chloroplast	NC_045394.1/KY404931.1	80	2019-12-12T00:00:00Z
Araucaria bidwillii	Eukaryota;Plants;Land Plants			PRJNA595190	0.146042	36.5231	chloroplast	NC_045395.1/KY404933.1	82	2019-12-12T00:00:00Z
Gastrochilus fuscopunctatus	Eukaryota;Plants;Land Plants			PRJNA407159	0.146183	36.784	chloroplast	NC_035830.1/KX871233.1	74	2017-09-13T00:00:00Z
Araucaria angustifolia	Eukaryota;Plants;Land Plants			PRJNA487426	0.146203	36.5417	plastid	NC_039155.1/MH599004.1	81	2018-08-24T00:00:00Z
Mankyua chejuensis	Eukaryota;Plants;Land Plants			PRJNA146829	0.146221	37.9713	chloroplast	NC_017006.1/JF343520.2	87	2012-04-11T00:00:00Z
Passiflora actinia	Eukaryota;Plants;Land Plants			PRJNA483670	0.146255	37.0558	chloroplast	NC_038118.1/MF807934.1	77	2018-07-31T00:00:00Z
Corallorhiza wisteriana	Eukaryota;Plants;Land Plants			PRJNA267282	0.146437	37.0528	plastid	NC_025663.1/KM390020.1	73	2014-11-24T00:00:00Z
Oncidium hybrid cultivar	Eukaryota;Plants;Land Plants			PRJNA48045	0.146484	37.3188	chloroplast	NC_014056.1/GQ324949.1	74	2010-04-27T00:00:00Z
Holcoglossum nujiangense	Eukaryota;Plants;Land Plants			PRJNA532175	0.146487	36.7241	plastid	NC_041515.1/MK442929.1	74	2019-04-10T00:00:00Z
Neofinetia falcata	Eukaryota;Plants;Land Plants			PRJNA420697	0.146497	36.6424	chloroplast	NC_036372.1/KT726907.1	74	2017-12-18T00:00:00Z
Neofinetia richardsiana	Eukaryota;Plants;Land Plants			PRJNA420711	0.146498	36.6408	chloroplast	NC_036373.1/KT726908.1	74	2017-12-18T00:00:00Z
Coriandrum sativum	Eukaryota;Plants;Land Plants			PRJNA317877	0.146519	37.2757	chloroplast	NC_029850.1/KR002656.1	78	2016-04-09T00:00:00Z
Holcoglossum lingulatum	Eukaryota;Plants;Land Plants			PRJNA532176	0.146525	36.8463	plastid	NC_041465.1/MK460222.1	74	2019-04-10T00:00:00Z
Holcoglossum weixiense	Eukaryota;Plants;Land Plants			PRJNA531977	0.146597	36.745	plastid	NC_041521.1/MK442936.1	74	2019-04-10T00:00:00Z
Passiflora retipetala	Eukaryota;Plants;Land Plants			PRJNA484476	0.146678	37.0635	chloroplast	NC_038188.1/MF807945.1	79	2018-08-03T00:00:00Z
Legenere valdiviana	Eukaryota;Plants;Land Plants			PRJNA394460	0.146691	40.254	plastid	NC_035364.1/MF061177.1	74	2017-07-14T00:00:00Z
Araucaria heterophylla	Eukaryota;Plants;Land Plants			PRJNA274926	0.146723	36.6623	plastid	NC_026450.1/KM067155.1	82	2015-04-22T00:00:00Z
Holcoglossum nagalandense	Eukaryota;Plants;Land Plants			PRJNA532016	0.146826	36.6883	plastid	NC_041514.1/MK442928.1	74	2019-04-10T00:00:00Z
Schisandra sphenanthera	Eukaryota;Plants;Land Plants			PRJNA439091	0.146843	39.5974	chloroplast	NC_037145.1/KX638480.1	82	2018-03-23T00:00:00Z
Schisandra chinensis	Eukaryota;Plants;Land Plants			PRJNA389052	0.146859	39.6816	chloroplast	NC_034908.1/KY111264.1	81	2017-06-02T00:00:00Z
Pelatantheria scolopendrifolia	Eukaryota;Plants;Land Plants			PRJNA407145	0.14686	36.5266	chloroplast	NC_035829.1/KX871232.1	74	2017-09-13T00:00:00Z
Holcoglossum flavescens	Eukaryota;Plants;Land Plants			PRJNA532177	0.146863	36.6975	plastid	NC_041512.1/MK442925.1	74	2019-04-10T00:00:00Z
Vandenboschia speciosa	Eukaryota;Plants;Land Plants			PRJNA524582	0.146874	37.5478	chloroplast	NC_041000.1/MH648610.1	84	2019-02-27T00:00:00Z
Tulipa altaica	Eukaryota;Plants;Land Plants		SAMN10959846	PRJNA573376	0.146887	37.1183	chloroplast	NC_044780.1/MK673755.1	81	2019-09-21T00:00:00Z
Angelica gigas	Eukaryota;Plants;Land Plants			PRJNA313571	0.146916	37.5596	chloroplast	NC_029393.1/KT963038.1	85	2016-03-01T00:00:00Z
Angelica dahurica	Eukaryota;Plants;Land Plants			PRJNA313726	0.146918	37.5243	chloroplast	NC_029392.1/KT963037.1	85	2016-03-01T00:00:00Z
Holcoglossum subulifolium	Eukaryota;Plants;Land Plants			PRJNA532193	0.14693	36.8352	plastid	NC_041519.1/MK442934.1	74	2019-04-10T00:00:00Z
Angelica laxifoliata	Eukaryota;Plants;Land Plants			PRJNA509829	0.147026	37.4757	chloroplast	NC_040122.1/MH180258.1	85	2018-12-14T00:00:00Z
Neottia cordata	Eukaryota;Plants;Land Plants			PRJNA527585	0.147034	37.5009	chloroplast	NC_041189.1/MH590356.1	80	2019-03-18T00:00:00Z
Phedimus takesimensis	Eukaryota;Plants;Land Plants			PRJNA272066	0.147048	38.0842	chloroplast	NC_026065.1/KF954541.1	84	2015-01-10T00:00:00Z
Holcoglossum quasipinifolium	Eukaryota;Plants;Land Plants			PRJNA531970	0.147063	36.7897	plastid	NC_041516.1/MK442931.1	74	2019-04-10T00:00:00Z
Passiflora oerstedii	Eukaryota;Plants;Land Plants			PRJNA483611	0.147073	37.0557	chloroplast	NC_038124.1/MF807942.1	77	2018-07-31T00:00:00Z
Angelica acutiloba	Eukaryota;Plants;Land Plants			PRJNA313586	0.147074	37.5342	chloroplast	NC_029391.1/KT963036.1	85	2016-03-01T00:00:00Z
Cattleya liliputana	Eukaryota;Plants;Land Plants			PRJNA356572	0.147092	37.3515	chloroplast	NC_032083.1/KP202881.1	78	2016-12-07T00:00:00Z
Vaginularia trichoidea	Eukaryota;Plants;Land Plants			PRJNA511681	0.147102	39.1864	chloroplast	NC_040175.1/MH173085.1	87	2018-12-24T00:00:00Z
Angelica polymorpha	Eukaryota;Plants;Land Plants			PRJNA532005	0.147127	37.5281	chloroplast	NC_041580.1/MH260705.1	85	2019-04-10T00:00:00Z
Pinguicula ehlersiae	Eukaryota;Plants;Land Plants			PRJNA238115	0.147147	38.1938	chloroplast	NC_023463.1/HG803178.1	72	2014-01-23T00:00:00Z
Selaginella sanguinolenta	Eukaryota;Plants;Land Plants			PRJNA532188	0.147148	50.7781	chloroplast	NC_041645.1/MH598536.1	69	2019-04-10T00:00:00Z
Lespedeza davurica	Eukaryota;Plants;Land Plants			PRJNA550948	0.147151	34.6834	chloroplast	NC_042748.1/MH800328.1	82	2019-06-25T00:00:00Z
Gentiana stipitata	Eukaryota;Plants;Land Plants			PRJNA479061	0.147156	37.9291	chloroplast	NC_037984.1/MG192309.1	85	2018-07-05T00:00:00Z
Holcoglossum rupestre	Eukaryota;Plants;Land Plants			PRJNA531980	0.147163	36.675	plastid	NC_041517.1/MK442932.1	74	2019-04-10T00:00:00Z
Holcoglossum wangii	Eukaryota;Plants;Land Plants			PRJNA531978	0.14717	36.7446	plastid	NC_041520.1/MK442935.1	74	2019-04-10T00:00:00Z
Silene conica	Eukaryota;Plants;Land Plants			PRJNA81367	0.147208	36.1224	chloroplast	NC_016729.1/JF715054.1	80	2012-01-27T00:00:00Z
Semenovia gyirongensis	Eukaryota;Plants;Land Plants			PRJNA550864	0.147246	37.5691	chloroplast	NC_042912.1/MK757488.1	85	2019-06-25T00:00:00Z
Osyris alba	Eukaryota;Plants;Land Plants			PRJNA298002	0.147253	37.6644	chloroplast	NC_027960.1/KT070882.1	74	2015-10-07T00:00:00Z
Ostericum grosseserratum	Eukaryota;Plants;Land Plants			PRJNA304894	0.147282	37.5375	chloroplast	NC_028618.1/KT852844.1	83	2015-12-03T00:00:00Z
Corallorhiza odontorhiza	Eukaryota;Plants;Land Plants			PRJNA267283	0.147317	36.9937	plastid	NC_025664.1/KM390021.1	73	2014-11-20T00:00:00Z
Kingdonia uniflora	Eukaryota;Plants;Land Plants			PRJNA407137	0.147378	37.8367	chloroplast	NC_035873.1/KY908401.1	78	2017-09-13T00:00:00Z
Champereia manillana	Eukaryota;Plants;Land Plants			PRJNA389055	0.147461	37.4133	plastid	NC_034931.1/KY436366.1	73	2017-06-02T00:00:00Z
Glehnia littoralis	Eukaryota;Plants;Land Plants			PRJNA387762	0.147477	37.5103	chloroplast	NC_034645.1/KU866532.1	85	2017-05-24T00:00:00Z
Dianthus caryophyllus	Eukaryota;Plants;Land Plants			PRJNA496193	0.147604	36.3019	chloroplast	NC_039650.1/MG989277.1	83	2018-11-06T00:00:00Z
Gastrochilus japonicus	Eukaryota;Plants;Land Plants			PRJNA407153	0.147697	36.845	chloroplast	NC_035833.1/KX871236.1	74	2017-09-13T00:00:00Z
Oncidium sphacelatum	Eukaryota;Plants;Land Plants			PRJNA300493	0.147761	37.137	plastid	NC_028148.1/KM032624.1	75	2015-11-01T00:00:00Z
Seseli montanum	Eukaryota;Plants;Land Plants			PRJNA289803	0.147823	37.5747	plastid	NC_027451.1/KM035851.1	82	2015-07-14T00:00:00Z
Ledebouriella seseloides	Eukaryota;Plants;Land Plants			PRJNA387889	0.14783	37.5262	chloroplast	NC_034643.1/KU866529.1	85	2017-05-24T00:00:00Z
Fragaria orientalis	Eukaryota;Plants;Land Plants			PRJNA399890	0.147835	37.6007	chloroplast	NC_035501.1/KY769126.1	84	2017-08-24T00:00:00Z
Silene conoidea	Eukaryota;Plants;Land Plants			PRJNA236276	0.147896	36.0213	chloroplast	NC_023358.1/KF527885.1	80	2014-01-24T00:00:00Z
Corallorhiza mertensiana	Eukaryota;Plants;Land Plants			PRJNA267284	0.147941	36.7802	plastid	NC_025661.1/KM390018.1	60	2014-11-25T00:00:00Z
Vanilla pompona	Eukaryota;Plants;Land Plants			PRJNA433119	0.148009	35.4026	chloroplast	NC_036809.1/MF197310.1	76	2018-02-06T00:00:00Z
Vanilla planifolia	Eukaryota;Plants;Land Plants			PRJNA280315	0.148011	35.4041	chloroplast	NC_026778.1/KJ566306.1	75	2015-04-22T00:00:00Z
Holcoglossum amesianum	Eukaryota;Plants;Land Plants			PRJNA532178	0.148074	36.6391	plastid	NC_041511.1/MK442924.1	74	2019-04-10T00:00:00Z
Silene chalcedonica	Eukaryota;Plants;Land Plants			PRJNA236258	0.148081	36.3483	chloroplast	NC_023359.1/KF527886.1	81	2014-01-30T00:00:00Z
Anogramma chaerophylla	Eukaryota;Plants;Land Plants			PRJNA514755	0.148099	40.2535	chloroplast	NC_040210.1/MH173080.1	87	2019-01-11T00:00:00Z
Passiflora quadrangularis	Eukaryota;Plants;Land Plants			PRJNA483622	0.148106	36.8655	chloroplast	NC_038126.1/MF807944.1	77	2018-07-31T00:00:00Z
Pityrogramma trifoliata	Eukaryota;Plants;Land Plants			PRJNA514757	0.148156	40.022	chloroplast	NC_040207.1/MH173075.1	87	2019-01-11T00:00:00Z
Lespedeza floribunda	Eukaryota;Plants;Land Plants			PRJNA550682	0.148233	34.7278	chloroplast	NC_042693.1/MH800327.1	82	2019-06-25T00:00:00Z
Cattleya crispata	Eukaryota;Plants;Land Plants			PRJNA276205	0.148343	37.2677	chloroplast	NC_026568.1/KP168671.1	78	2015-03-27T00:00:00Z
Onoclea sensibilis	Eukaryota;Plants;Land Plants			PRJNA407146	0.148395	44.4152	chloroplast	NC_035860.1/KY427354.1	88	2017-09-13T00:00:00Z
Gastrochilus calceolaris	Eukaryota;Plants;Land Plants			PRJNA550955	0.148428	36.7613	chloroplast	NC_042686.1/MH719016.1	74	2019-06-25T00:00:00Z
Kummerowia striata	Eukaryota;Plants;Land Plants			PRJNA557935	0.14845	34.9707	chloroplast	NC_044114.1/MG867569.1	83	2019-08-01T00:00:00Z
Ligusticum sinense	Eukaryota;Plants;Land Plants			PRJNA483658	0.148512	37.6077	chloroplast	NC_038088.1/KX594382.1	82	2018-07-31T00:00:00Z
Cnidium officinale	Eukaryota;Plants;Land Plants			PRJNA504114	0.148518	37.6002	chloroplast	NC_039760.1/MH121055.1	85	2018-11-09T00:00:00Z
Illicium oligandrum	Eukaryota;Plants;Land Plants			PRJNA19937	0.148553	39.0473	chloroplast	NC_009600.1/EF380354.1	83	2007-06-22T00:00:00Z
Fragaria nipponica	Eukaryota;Plants;Land Plants			PRJNA399891	0.148592	37.6151	chloroplast	NC_035500.1/KY769125.1	84	2017-08-24T00:00:00Z
Streptochaeta spicata	Eukaryota;Plants;Land Plants			PRJNA377068	0.148617	38.2453	chloroplast	NC_033862.1/KU666544.1	83	2017-02-27T00:00:00Z
Corallorhiza bulbosa	Eukaryota;Plants;Land Plants			PRJNA267285	0.148643	37.14	plastid	NC_025659.1/KM390013.1	74	2015-01-10T00:00:00Z
Parnassia palustris	Eukaryota;Plants;Land Plants			PRJNA595296	0.1487	37.0484	chloroplast	NC_045280.1/MK541646.1	78	2019-12-12T00:00:00Z
Gentiana tibetica	Eukaryota;Plants;Land Plants			PRJNA326012	0.148765	37.7132	chloroplast	NC_030319.1/KU975374.1	85	2016-06-17T00:00:00Z
Apios americana	Eukaryota;Plants;Land Plants			PRJNA270451	0.148772	35.4979	chloroplast	NC_025909.1/KF856618.1	82	2014-12-22T00:00:00Z
Gentiana crassicaulis	Eukaryota;Plants;Land Plants			PRJNA289766	0.148776	37.7205	chloroplast	NC_027442.1/KJ676538.1	85	2015-07-14T00:00:00Z
Dendrobium moniliforme	Eukaryota;Plants;Land Plants			PRJNA390947	0.148778	37.5452	chloroplast	NC_035154.1/AB893950.1	73	2017-06-27T00:00:00Z
Gentiana dahurica	Eukaryota;Plants;Land Plants			PRJNA496106	0.148803	37.7082	chloroplast	NC_039572.1/MH261259.1	85	2018-11-06T00:00:00Z
Campylotropis macrocarpa	Eukaryota;Plants;Land Plants			PRJNA557912	0.148814	34.8616	chloroplast	NC_044100.1/MG867566.1	83	2019-08-01T00:00:00Z
Gentiana officinalis	Eukaryota;Plants;Land Plants			PRJNA496192	0.148879	37.7038	chloroplast	NC_039574.1/MH261261.1	85	2018-11-06T00:00:00Z
Gentiana siphonantha	Eukaryota;Plants;Land Plants			PRJNA496191	0.148908	37.6998	chloroplast	NC_039573.1/MH261260.1	85	2018-11-06T00:00:00Z
Phalaenopsis hybrid cultivar	Eukaryota;Plants;Land Plants			PRJNA267393	0.148918	36.6645	chloroplast	NC_025593.1/KJ944326.1	73	2014-11-18T00:00:00Z
Phalaenopsis equestris	Eukaryota;Plants;Land Plants			PRJNA382149	0.148959	36.6524	chloroplast	Pltd:NC_017609.1/	73	2012-04-23T00:00:00Z
Siphonostegia chinensis	Eukaryota;Plants;Land Plants			PRJNA609470	0.148961	38.4443	chloroplast	NC_046038.1/MK113828.1	85	2020-03-07T00:00:00Z
Phalaenopsis aphrodite subsp. formosana	Eukaryota;Plants;Land Plants			PRJNA16122	0.148964	36.6505	chloroplast	NC_007499.1/AY916449.1	95	2005-10-25T00:00:00Z
Gentiana straminea	Eukaryota;Plants;Land Plants			PRJNA289844	0.148991	37.6949	chloroplast	NC_027441.1/KJ657732.1	85	2015-07-14T00:00:00Z
Rhus chinensis	Eukaryota;Plants;Land Plants			PRJNA368882	0.149011	37.7898	chloroplast	NC_033535.1/KX447140.1	82	2017-01-26T00:00:00Z
Takakia lepidozioides	Eukaryota;Plants;Land Plants			PRJNA306313	0.149016	37.0678	chloroplast	NC_028738.1/AP014702.1	61	2015-12-17T00:00:00Z
Lespedeza maritima	Eukaryota;Plants;Land Plants			PRJNA557966	0.149022	35.017	chloroplast	NC_044115.1/MG867570.1	83	2019-08-02T00:00:00Z
Dendrobium pseudotenellum	Eukaryota;Plants;Land Plants			PRJNA608370	0.149114	37.4432	chloroplast	NC_045854.1/MN915016.1	80	2020-02-24T00:00:00Z
Vanda brunnea	Eukaryota;Plants;Land Plants			PRJNA531976	0.149216	36.6676	plastid	NC_041522.1/MK442937.1	74	2019-04-10T00:00:00Z
Thrixspermum japonicum	Eukaryota;Plants;Land Plants			PRJNA407169	0.14922	36.0716	chloroplast	NC_035831.2/KX871234.2	74	2017-09-13T00:00:00Z
Justicia leptostachya	Eukaryota;Plants;Land Plants			PRJNA573149	0.149227	38.1774	chloroplast	NC_044668.1/MK389502.2	86	2019-09-21T00:00:00Z
Erythrostemon gilliesii	Eukaryota;Plants;Land Plants			PRJNA595218	0.149235	36.8117	chloroplast	NC_045296.1/MN551237.1	73	2019-12-12T00:00:00Z
Lindsaea linearis	Eukaryota;Plants;Land Plants			PRJNA573208	0.149256	39.8383	chloroplast	NC_044681.1/MK705751.1	88	2019-09-21T00:00:00Z
Kadsura longipedunculata	Eukaryota;Plants;Land Plants			PRJNA509857	0.149288	39.8364	chloroplast	NC_040144.1/MH535482.1	77	2018-12-14T00:00:00Z
Calypso bulbosa var. occidentalis	Eukaryota;Plants;Land Plants			PRJNA524571	0.149313	37.1294	plastid	NC_040980.1/MG874037.1	74	2019-02-27T00:00:00Z
Joinvillea ascendens	Eukaryota;Plants;Land Plants			PRJNA348040	0.149327	38.105	chloroplast	NC_031427.1/KX035098.1	78	2016-10-13T00:00:00Z
Heracleum moellendorffii	Eukaryota;Plants;Land Plants			PRJNA541598	0.149349	37.5054	chloroplast	NC_042242.1/MK210561.1	85	2019-05-12T00:00:00Z
Corallorhiza trifida	Eukaryota;Plants;Land Plants			PRJNA267287	0.149384	37.2041	plastid	NC_025662.1/KM390019.1	74	2014-11-20T00:00:00Z
Llavea cordifolia	Eukaryota;Plants;Land Plants			PRJNA514769	0.149387	41.8798	chloroplast	NC_040216.1/MH173088.1	87	2019-01-11T00:00:00Z
Pteris vittata	Eukaryota;Plants;Land Plants			PRJNA514758	0.149424	36.707	chloroplast	NC_040204.1/MH173068.1	87	2019-01-11T00:00:00Z
Swertia hispidicalyx	Eukaryota;Plants;Land Plants			PRJNA563417	0.149488	38.1883	chloroplast	NC_044474.1/MH321887.1	84	2019-09-06T00:00:00Z
Tetragonia tetragonoides	Eukaryota;Plants;Land Plants			PRJNA435305	0.149506	37.3022	chloroplast	NC_036991.1/MF975369.1	83	2018-02-22T00:00:00Z
Aster spathulifolius	Eukaryota;Plants;Land Plants			PRJNA289687	0.14951	37.7085	chloroplast	NC_027434.1/KF279514.1	87	2015-07-14T00:00:00Z
Vittaria appalachiana	Eukaryota;Plants;Land Plants			PRJNA514761	0.149531	40.1134	chloroplast	NC_040219.1/MH173091.1	87	2019-01-11T00:00:00Z
Sedum oryzifolium	Eukaryota;Plants;Land Plants			PRJNA295607	0.149609	37.6702	chloroplast	NC_027837.1/KM281675.1	85	2015-09-14T00:00:00Z
Pseudostellaria longipedicellata	Eukaryota;Plants;Land Plants			PRJNA495516	0.149626	36.4937	chloroplast	NC_039454.1/MH373593.2	81	2018-10-10T00:00:00Z
Nephrolepis biserrata	Eukaryota;Plants;Land Plants			PRJNA573226	0.149643	38.6346	chloroplast	NC_044683.1/MK705753.1	89	2019-09-21T00:00:00Z
Pseudostellaria okamotoi	Eukaryota;Plants;Land Plants			PRJNA508169	0.149653	36.5071	chloroplast	NC_039974.2/MH879018.2	81	2018-12-03T00:00:00Z
Pseudostellaria palibiniana	Eukaryota;Plants;Land Plants			PRJNA527562	0.149668	36.4901	chloroplast	NC_041166.1/MK120981.2	81	2019-03-18T00:00:00Z
Desmodium heterocarpon	Eukaryota;Plants;Land Plants			PRJNA557933	0.149696	35.2013	chloroplast	NC_044113.1/MG867567.1	82	2019-08-01T00:00:00Z
Stenogyne haliakalae GEO5	Eukaryota;Plants;Land Plants			PRJNA317870	0.149736	38.5285	chloroplast	NC_029817.1/KU724130.1	88	2016-04-09T00:00:00Z
Plantago ovata	Eukaryota;Plants;Land Plants			PRJNA532074	0.149739	38.3434	chloroplast	NC_041421.1/MH205737.1	86	2019-04-10T00:00:00Z
Stachys byzantina CL1004	Eukaryota;Plants;Land Plants			PRJNA317894	0.149749	38.6974	chloroplast	NC_029825.1/KU724141.1	88	2016-04-09T00:00:00Z
Ismelia carinata	Eukaryota;Plants;Land Plants			PRJNA509804	0.149752	37.4666	chloroplast	NC_040110.1/MG710387.1	85	2018-12-14T00:00:00Z
Pastinaca pimpinellifolia	Eukaryota;Plants;Land Plants			PRJNA289806	0.149758	37.4144	plastid	NC_027450.1/KM035850.1	82	2015-07-14T00:00:00Z
Pseudostellaria heterophylla	Eukaryota;Plants;Land Plants			PRJNA557943	0.149765	36.4912	chloroplast	NC_044183.1/MK801111.1	81	2019-08-02T00:00:00Z
Hypodematium crenatum	Eukaryota;Plants;Land Plants			PRJNA407121	0.149794	41.0924	chloroplast	NC_035857.1/KY427351.1	88	2017-09-13T00:00:00Z
Suaeda glauca	Eukaryota;Plants;Land Plants			PRJNA595293	0.149807	36.4536	chloroplast	NC_045303.1/MK867773.1	85	2019-12-12T00:00:00Z
Cymbidium macrorhizon	Eukaryota;Plants;Land Plants			PRJNA316241	0.14985	37.0277	chloroplast	NC_029713.1/KU179437.1	75	2016-03-28T00:00:00Z
Gentiana macrophylla	Eukaryota;Plants;Land Plants			PRJNA400969	0.149916	37.6651	chloroplast	NC_035719.1/KY856959.1	78	2017-08-31T00:00:00Z
Pseudophegopteris aurita	Eukaryota;Plants;Land Plants			PRJNA407164	0.149917	43.0692	chloroplast	NC_035861.1/KY427355.1	88	2017-09-13T00:00:00Z
Cymbidium lancifolium	Eukaryota;Plants;Land Plants			PRJNA316244	0.149945	37.1176	chloroplast	NC_029712.1/KU179436.1	75	2016-03-28T00:00:00Z
Ajuga reptans	Eukaryota;Plants;Land Plants			PRJNA232186	0.149963	38.2868	plastid	NC_023102.1/KF709391.1	84	2013-12-20T00:00:00Z
Croton tiglium	Eukaryota;Plants;Land Plants		SAMN09982495	PRJNA509823	0.150021	35.4084	chloroplast	NC_040113.1/MH394334.1	78	2018-12-14T00:00:00Z
Gypsophila vaccaria	Eukaryota;Plants;Land Plants			PRJNA524549	0.150042	36.5871	plastid	NC_040936.1/MK397906.1	81	2019-02-27T00:00:00Z
Dendrobium parciflorum	Eukaryota;Plants;Land Plants			PRJNA394353	0.150073	37.667	chloroplast	NC_035334.1/LC193512.1	72	2017-07-14T00:00:00Z
Platylobium obtusangulum	Eukaryota;Plants;Land Plants			PRJNA600906	0.15009	36.7033	plastid	NC_045516.1/MN275233.1	81	2020-01-13T00:00:00Z
Stenogyne kanehoana HSJ14046	Eukaryota;Plants;Land Plants			PRJNA317871	0.150115	38.5265	chloroplast	NC_029821.1/KU724136.1	88	2016-04-09T00:00:00Z
Stenogyne bifida HI0332	Eukaryota;Plants;Land Plants			PRJNA317869	0.150129	38.5129	chloroplast	NC_029818.1/KU724132.1	88	2016-04-09T00:00:00Z
Haplostachys haplostachya HI0333	Eukaryota;Plants;Land Plants			PRJNA317866	0.15013	38.5093	chloroplast	NC_029819.1/KU724133.1	88	2016-04-09T00:00:00Z
Phyllostegia velutina HI0361	Eukaryota;Plants;Land Plants			PRJNA317867	0.150131	38.4704	chloroplast	NC_029820.1/KU724134.1	88	2016-04-09T00:00:00Z
Cymbidium sinense x Cymbidium goeringii	Eukaryota;Plants;Land Plants			PRJNA595266	0.150149	37.0952	chloroplast	NC_045406.1/MN532117.1	79	2019-12-12T00:00:00Z
Onychium japonicum	Eukaryota;Plants;Land Plants			PRJNA514776	0.150156	41.1632	chloroplast	NC_040205.1/MH173069.1	87	2019-01-11T00:00:00Z
Cryptogramma acrostichoides	Eukaryota;Plants;Land Plants			PRJNA514766	0.150162	42.3363	chloroplast	NC_040211.1/MH173081.1	87	2019-01-11T00:00:00Z
Vanilla aphylla	Eukaryota;Plants;Land Plants			PRJNA394339	0.150165	35.0221	chloroplast	NC_035320.1/LC085348.1	64	2017-07-14T00:00:00Z
Stachys sylvatica LVA358	Eukaryota;Plants;Land Plants			PRJNA317876	0.150167	38.5617	chloroplast	NC_029824.1/KU724140.1	88	2016-04-09T00:00:00Z
Diplazium dushanense	Eukaryota;Plants;Land Plants			PRJNA407160	0.150179	43.1585	chloroplast	NC_035851.1/KY427345.1	88	2017-09-13T00:00:00Z
Veronica persica	Eukaryota;Plants;Land Plants			PRJNA347997	0.150198	37.9033	plastid	NC_031344.1/KT724052.1	86	2016-10-13T00:00:00Z
Austroblechnum melanocaulon	Eukaryota;Plants;Land Plants			PRJNA407175	0.150202	43.6818	chloroplast	NC_035840.1/KY427334.1	88	2017-09-13T00:00:00Z
Cymbidium kanran	Eukaryota;Plants;Land Plants			PRJNA316245	0.150217	37.095	chloroplast	NC_029711.1/KU179435.1	78	2016-03-28T00:00:00Z
Silene capitata	Eukaryota;Plants;Land Plants			PRJNA394428	0.150224	36.3577	chloroplast	NC_035226.1/KT727930.1	84	2017-07-14T00:00:00Z
Andrographis paniculata	Eukaryota;Plants;Land Plants			PRJNA221693	0.150249	38.2858	chloroplast	NC_022451.2/KF150644.2	87	2013-10-24T00:00:00Z
Ohwia caudata	Eukaryota;Plants;Land Plants			PRJNA557981	0.150249	35.1157	chloroplast	NC_044105.1/MG867572.1	83	2019-08-02T00:00:00Z
Stachys chamissonis CL1002	Eukaryota;Plants;Land Plants			PRJNA317897	0.150254	38.5294	chloroplast	NC_029822.1/KU724138.1	88	2016-04-09T00:00:00Z
Antrophyum semicostatum	Eukaryota;Plants;Land Plants			PRJNA511687	0.150274	40.0781	chloroplast	NC_040176.1/MH173087.1	87	2018-12-24T00:00:00Z
Stachys coccinea CL1003	Eukaryota;Plants;Land Plants			PRJNA317868	0.150275	38.5047	chloroplast	NC_029823.1/KU724139.1	88	2016-04-09T00:00:00Z
Phaseolus vulgaris	Eukaryota;Plants;Land Plants			PRJNA19203	0.150285	35.442	chloroplast	NC_009259.1/DQ886273.1	83	2007-04-03T00:00:00Z
Silene aprica	Eukaryota;Plants;Land Plants			PRJNA524592	0.150293	36.3477	plastid	NC_040934.1/MK397897.1	82	2019-02-27T00:00:00Z
Mangifera indica	Eukaryota;Plants;Land Plants		SAMN09899728	PRJNA487154	0.150346	37.7536	chloroplast	Pltd:CM021858.1	0	2020-03-10T00:00:00Z
Adiantum shastense	Eukaryota;Plants;Land Plants			PRJNA453269	0.150414	44.3496	chloroplast	NC_037478.1/MG432483.1	88	2018-04-24T00:00:00Z
Sedum sarmentosum	Eukaryota;Plants;Land Plants			PRJNA232220	0.150448	37.7459	chloroplast	NC_023085.1/JX427551.1	86	2013-12-20T00:00:00Z
Achyrachaena mollis	Eukaryota;Plants;Land Plants			PRJNA422819	0.150468	37.5714	chloroplast	NC_036504.1/MF663009.1	83	2017-12-18T00:00:00Z
Adiantum tricholepis	Eukaryota;Plants;Land Plants			PRJNA511686	0.15047	42.5028	chloroplast	NC_040172.1/MH173071.1	88	2018-12-24T00:00:00Z
Teucrium mascatense	Eukaryota;Plants;Land Plants			PRJNA557915	0.150499	38.3876	chloroplast	NC_044073.1/MH325132.1	88	2019-08-01T00:00:00Z
Lathraea squamaria	Eukaryota;Plants;Land Plants			PRJNA295594	0.150504	38.1299	chloroplast	NC_027838.1/KM652488.1	50	2015-09-14T00:00:00Z
Lamium album	Eukaryota;Plants;Land Plants			PRJNA435388	0.150505	38.6087	plastid	NC_036971.1/KY562589.1	89	2018-02-22T00:00:00Z
Dracocephalum palmatum	Eukaryota;Plants;Land Plants			PRJNA353481	0.15051	37.8267	chloroplast	NC_031874.1/KU958581.1	87	2016-11-14T00:00:00Z
Limonium tenellum	Eukaryota;Plants;Land Plants			PRJNA529161	0.150515	37.1039	plastid	NC_041279.1/MK397871.1	82	2019-03-26T00:00:00Z
Amaranthus hypochondriacus	Eukaryota;Plants;Land Plants			PRJNA339093	0.150518	36.6136	chloroplast	NC_030770.1/KX279888.1	73	2016-08-16T00:00:00Z
Lotus japonicus Accession MG-20	Eukaryota;Plants;Land Plants			PRJNA16147	0.150519	36.0307	chloroplast	NC_002694.1/AP002983.1	82	2001-03-01T00:00:00Z
Amaranthus caudatus	Eukaryota;Plants;Land Plants			PRJNA509830	0.150523	36.6123	chloroplast	NC_040143.1/MG836508.1	84	2018-12-14T00:00:00Z
Androsace paxiana	Eukaryota;Plants;Land Plants			PRJNA387827	0.150528	37.1638	chloroplast	NC_034640.1/KU513437.1	86	2017-05-24T00:00:00Z
Elaeagnus angustifolia	Eukaryota;Plants;Land Plants			PRJNA524554	0.150546	36.9495	chloroplast	NC_040992.1/MK131395.1	86	2019-02-27T00:00:00Z
Dendrosenecio keniensis	Eukaryota;Plants;Land Plants			PRJNA433146	0.150548	37.4704	chloroplast	NC_036832.1/KY434194.1	89	2018-02-06T00:00:00Z
Dendrosenecio brassiciformis	Eukaryota;Plants;Land Plants			PRJNA479074	0.150551	37.4604	chloroplast	NC_037960.1/MG560051.1	89	2018-07-05T00:00:00Z
Dendrosenecio keniodendron	Eukaryota;Plants;Land Plants			PRJNA433147	0.150555	37.4614	chloroplast	NC_036831.1/KY434193.1	89	2018-02-06T00:00:00Z
Dendrosenecio battiscombei	Eukaryota;Plants;Land Plants			PRJNA433123	0.150556	37.4625	chloroplast	NC_036833.1/KY434195.1	88	2018-02-06T00:00:00Z
Adiantum capillus-veneris	Eukaryota;Plants;Land Plants			PRJNA12239	0.150568	42.0069	chloroplast	NC_004766.1/AY178864.1	87	2003-05-05T00:00:00Z
Amana wanzhensis	Eukaryota;Plants;Land Plants		SAMN06176954	PRJNA387909	0.150576	36.7542	chloroplast	NC_034705.1/KY401422.1	81	2017-05-25T00:00:00Z
Dendrosenecio meruensis	Eukaryota;Plants;Land Plants			PRJNA479118	0.150587	37.4508	chloroplast	NC_037958.1/MG560049.1	89	2018-07-05T00:00:00Z
Dendrosenecio kilimanjari	Eukaryota;Plants;Land Plants			PRJNA479314	0.150593	37.4519	chloroplast	NC_037957.1/MG560045.1	89	2018-07-05T00:00:00Z
Dendrosenecio cheranganiensis	Eukaryota;Plants;Land Plants			PRJNA479315	0.150606	37.452	chloroplast	NC_037956.1/MG560044.1	89	2018-07-05T00:00:00Z
Dendrosenecio johnstonii	Eukaryota;Plants;Land Plants			PRJNA479221	0.150607	37.4498	chloroplast	NC_037959.1/MG560050.1	89	2018-07-05T00:00:00Z
Gymnocarpos przewalskii	Eukaryota;Plants;Land Plants		SAMN07276322	PRJNA433149	0.150636	36.5138	chloroplast	NC_036812.1/MF795140.1	81	2018-02-06T00:00:00Z
Woodsia polystichoides	Eukaryota;Plants;Land Plants			PRJNA407148	0.150685	42.6207	chloroplast	NC_035865.1/KY427359.1	88	2017-09-13T00:00:00Z
Jacobaea vulgaris	Eukaryota;Plants;Land Plants			PRJNA67047	0.150689	37.3199	chloroplast	NC_015543.1/HQ234669.1	87	2011-06-02T00:00:00Z
Ageratina adenophora	Eukaryota;Plants;Land Plants			PRJNA67575	0.150698	37.4617	chloroplast	NC_015621.1/JF826503.1	86	2011-06-02T00:00:00Z
Hinterhubera ericoides	Eukaryota;Plants;Land Plants		SAMN04076333	PRJNA389068	0.150711	37.3277	chloroplast	NC_034884.1/KX063910.1	85	2017-06-02T00:00:00Z
Pellaea truncata	Eukaryota;Plants;Land Plants			PRJNA514764	0.150713	42.4781	chloroplast	NC_040202.1/MH173066.1	87	2019-01-11T00:00:00Z
Amana erythronioides	Eukaryota;Plants;Land Plants		SAMN06176959	PRJNA387910	0.150714	36.7172	chloroplast	NC_034634.1/KY401421.1	83	2017-05-25T00:00:00Z
Amana anhuiensis	Eukaryota;Plants;Land Plants		SAMN06174287	PRJNA387908	0.150723	36.7389	chloroplast	NC_034706.1/KY401423.1	83	2017-05-25T00:00:00Z
Spinacia oleracea	Eukaryota;Plants;Land Plants			PRJNA396054	0.150725	36.8161	plastid	Pltd:NC_002202.1/	96	2000-04-20T00:00:00Z
Shorea pachyphylla	Eukaryota;Plants;Land Plants			PRJNA524610	0.150753	37.4268	chloroplast	NC_040966.1/MH841940.1	81	2019-02-27T00:00:00Z
Dendrobium primulinum	Eukaryota;Plants;Land Plants			PRJNA394383	0.150767	37.5805	chloroplast	NC_035321.1/LC192810.1	72	2017-07-14T00:00:00Z
Diplazium striatum	Eukaryota;Plants;Land Plants			PRJNA407172	0.150779	43.8489	chloroplast	NC_035852.1/KY427346.1	88	2017-09-13T00:00:00Z
Passiflora cincinnata UFV	Eukaryota;Plants;Land Plants			PRJNA479112	0.150783	37.0712	chloroplast	NC_037690.1/KY820583.1	77	2018-07-05T00:00:00Z
Soliva sessilis	Eukaryota;Plants;Land Plants		SAMN04076333	PRJNA389061	0.150784	37.4649	chloroplast	NC_034851.1/KX063863.1	85	2017-06-02T00:00:00Z
Primula stenodonta	Eukaryota;Plants;Land Plants			PRJNA387878	0.150785	37.1025	chloroplast	NC_034677.1/KX668176.1	86	2017-05-24T00:00:00Z
Amana edulis	Eukaryota;Plants;Land Plants		SAMN06169689	PRJNA387907	0.15081	36.7316	chloroplast	NC_034707.1/KY401425.1	83	2017-05-25T00:00:00Z
Crocus cartwrightianus	Eukaryota;Plants;Land Plants			PRJNA532165	0.150819	37.5065	chloroplast	NC_041459.1/MH542231.1	86	2019-04-10T00:00:00Z
Crocus sativus	Eukaryota;Plants;Land Plants			PRJNA531999	0.15082	37.5063	chloroplast	NC_041460.1/MH542233.1	86	2019-04-10T00:00:00Z
Passiflora ligularis	Eukaryota;Plants;Land Plants			PRJNA483633	0.150827	36.9715	chloroplast	NC_038122.1/MF807940.1	77	2018-07-31T00:00:00Z
Neocinnamomum mekongense	Eukaryota;Plants;Land Plants			PRJNA504156	0.150842	38.8373	chloroplast	NC_039718.1/MF686120.1	82	2018-11-09T00:00:00Z
Neocinnamomum delavayi	Eukaryota;Plants;Land Plants			PRJNA413220	0.15085	38.8392	chloroplast	NC_036003.1/LC213014.1	81	2017-10-06T00:00:00Z
Primula veris	Eukaryota;Plants;Land Plants			PRJNA348074	0.150856	37.0937	chloroplast	NC_031428.1/KX639823.1	85	2016-10-13T00:00:00Z
Primula sinensis	Eukaryota;Plants;Land Plants			PRJNA328612	0.150859	37.2195	chloroplast	NC_030609.1/KU321892.1	85	2016-07-12T00:00:00Z
Justicia flava	Eukaryota;Plants;Land Plants			PRJNA574359	0.150888	38.2065	chloroplast	NC_044862.1/MK548577.1	88	2019-09-26T00:00:00Z
Piofontia jenesana	Eukaryota;Plants;Land Plants		SAMN04076333	PRJNA387938	0.150924	37.5162	chloroplast	NC_034829.1/KX063934.1	84	2017-05-26T00:00:00Z
Deparia viridifrons	Eukaryota;Plants;Land Plants			PRJNA407122	0.150939	43.7846	chloroplast	NC_035846.1/KY427340.1	88	2017-09-13T00:00:00Z
Tinospora cordifolia	Eukaryota;Plants;Land Plants			PRJNA541688	0.150945	38.6823	chloroplast	NC_042153.1/MH577056.1	85	2019-05-12T00:00:00Z
Artemisia annua	Eukaryota;Plants;Land Plants			PRJNA387973	0.150952	37.4781	plastid	NC_034683.1/	87	2017-05-25T00:00:00Z
Trichomanes trollii	Eukaryota;Plants;Land Plants			PRJNA527549	0.150965	38.1088	chloroplast	NC_041122.1/MH348274.1	88	2019-03-18T00:00:00Z
Chrysanthemum indicum	Eukaryota;Plants;Land Plants			PRJNA190114	0.150972	37.4785	chloroplast	NC_020320.1/JN867589.1	83	2013-02-25T00:00:00Z
Athyrium opacum	Eukaryota;Plants;Land Plants			PRJNA407196	0.150979	43.6922	chloroplast	NC_035841.1/KY427335.1	88	2017-09-13T00:00:00Z
Chrysanthemum lucidum	Eukaryota;Plants;Land Plants			PRJNA524575	0.150985	37.4945	chloroplast	NC_040920.1/MH028788.1	84	2019-02-27T00:00:00Z
Dryopteris decipiens	Eukaryota;Plants;Land Plants			PRJNA407142	0.150987	42.6679	chloroplast	NC_035854.1/KY427348.1	88	2017-09-13T00:00:00Z
Woodsia macrochlaena	Eukaryota;Plants;Land Plants			PRJNA407195	0.150987	42.7348	chloroplast	NC_035864.1/KY427358.1	88	2017-09-13T00:00:00Z
Matteuccia struthiopteris	Eukaryota;Plants;Land Plants			PRJNA407147	0.151003	44.2607	chloroplast	NC_035859.1/KY427353.1	88	2017-09-13T00:00:00Z
Diplopterygium glaucum	Eukaryota;Plants;Land Plants			PRJNA248851	0.151007	40.1637	chloroplast	NC_024158.1/KF225594.1	40	2014-06-09T00:00:00Z
Helianthus maximiliani	Eukaryota;Plants;Land Plants			PRJNA232222	0.151007	37.6128	plastid	NC_023114.1/KF746380.1	85	2013-12-20T00:00:00Z
Deparia lancea	Eukaryota;Plants;Land Plants			PRJNA407187	0.151011	43.9008	chloroplast	NC_035844.1/KY427338.1	88	2017-09-13T00:00:00Z
Chrysanthemum boreale	Eukaryota;Plants;Land Plants			PRJNA453211	0.151012	37.4738	chloroplast	NC_037388.1/MG913594.1	87	2018-04-24T00:00:00Z
Helianthus grosseserratus	Eukaryota;Plants;Land Plants			PRJNA232229	0.151017	37.613	plastid	NC_023108.1/KF746350.1	85	2013-12-20T00:00:00Z
Artemisia fukudo	Eukaryota;Plants;Land Plants			PRJNA557978	0.151021	37.4564	chloroplast	NC_044156.1/MK569048.1	88	2019-08-02T00:00:00Z
Corallorhiza macrantha	Eukaryota;Plants;Land Plants			PRJNA267415	0.151031	37.2102	plastid	NC_025660.1/KM390017.1	72	2014-11-20T00:00:00Z
Chrysanthemum x morifolium	Eukaryota;Plants;Land Plants			PRJNA185997	0.151033	37.4806	chloroplast	NC_020092.1/JQ362483.1	85	2013-01-10T00:00:00Z
Circaeaster agrestis	Eukaryota;Plants;Land Plants			PRJNA407138	0.151033	38.1566	chloroplast	NC_035872.1/KY908400.1	85	2017-09-13T00:00:00Z
Erythronium sibiricum	Eukaryota;Plants;Land Plants			PRJNA400980	0.151034	36.656	plastid	NC_035681.1/KX644899.1	83	2017-08-31T00:00:00Z
Vittaria graminifolia	Eukaryota;Plants;Land Plants			PRJNA514771	0.151035	40.1457	chloroplast	NC_040217.1/MH173089.1	87	2019-01-11T00:00:00Z
Helianthus strumosus	Eukaryota;Plants;Land Plants			PRJNA232185	0.151044	37.6122	plastid	NC_023113.1/KF746376.1	85	2013-12-20T00:00:00Z
Helianthus divaricatus	Eukaryota;Plants;Land Plants			PRJNA232225	0.151045	37.6113	plastid	NC_023109.1/KF746352.1	85	2013-12-20T00:00:00Z
Helianthus hirsutus	Eukaryota;Plants;Land Plants			PRJNA232213	0.151045	37.6106	plastid	NC_023111.1/KF746359.1	85	2013-12-20T00:00:00Z
Helianthus tuberosus	Eukaryota;Plants;Land Plants			PRJNA232227	0.151047	37.6095	plastid	NC_023112.1/KF746361.1	85	2013-12-20T00:00:00Z
Helianthus decapetalus	Eukaryota;Plants;Land Plants			PRJNA232230	0.151048	37.6	plastid	NC_023110.1/KF746356.1	85	2013-12-20T00:00:00Z
Artemisia capillaris	Eukaryota;Plants;Land Plants			PRJNA347998	0.151056	37.4596	chloroplast	NC_031400.1/KU736963.1	88	2016-10-13T00:00:00Z
Amana kuocangshanica	Eukaryota;Plants;Land Plants		SAMN06140795	PRJNA387906	0.151058	36.6998	chloroplast	NC_034708.1/KY401426.1	83	2017-05-25T00:00:00Z
Fritillaria unibracteata	Eukaryota;Plants;Land Plants			PRJNA573152	0.151058	36.9692	chloroplast	NC_044629.1/MH244909.1	83	2019-09-21T00:00:00Z
Artemisia scoparia	Eukaryota;Plants;Land Plants			PRJNA595337	0.15106	37.4527	chloroplast	NC_045286.1/MN385624.1	87	2019-12-12T00:00:00Z
Artemisia maritima	Eukaryota;Plants;Land Plants			PRJNA579634	0.151061	37.4484	chloroplast	NC_045093.1/MK532038.1	87	2019-10-29T00:00:00Z
Helianthus giganteus	Eukaryota;Plants;Land Plants			PRJNA232224	0.151066	37.6021	plastid	NC_023107.1/KF746346.1	85	2013-12-20T00:00:00Z
Saxifraga stolonifera	Eukaryota;Plants;Land Plants			PRJNA479071	0.151066	37.8278	chloroplast	NC_037882.1/MH191389.1	85	2018-07-05T00:00:00Z
Athyrium sheareri	Eukaryota;Plants;Land Plants			PRJNA407124	0.151068	43.5479	chloroplast	NC_035836.1/KY427330.1	88	2017-09-13T00:00:00Z
Helianthus argophyllus	Eukaryota;Plants;Land Plants			PRJNA323901	0.151069	37.6259	chloroplast	NC_030275.1/KU314500.1	82	2016-05-31T00:00:00Z
Leontopodium leiolepis	Eukaryota;Plants;Land Plants			PRJNA295608	0.151072	37.3213	chloroplast	NC_027835.1/KM267636.1	85	2015-09-14T00:00:00Z
Artemisia frigida	Eukaryota;Plants;Land Plants			PRJNA193798	0.151076	37.4758	chloroplast	NC_020607.1/JX293720.1	87	2013-03-25T00:00:00Z
Primula handeliana	Eukaryota;Plants;Land Plants			PRJNA489903	0.151081	37.0444	chloroplast	NC_039348.1/MG181221.1	86	2018-09-19T00:00:00Z
Opisthopappus taihangensis	Eukaryota;Plants;Land Plants			PRJNA550920	0.151089	37.4667	chloroplast	NC_042787.1/MK552323.1	87	2019-06-25T00:00:00Z
Salvia officinalis	Eukaryota;Plants;Land Plants			PRJNA484441	0.151089	38.0445	chloroplast	NC_038165.1/MG772529.1	87	2018-08-03T00:00:00Z
Crossostephium chinense	Eukaryota;Plants;Land Plants		SAMN09729526	PRJNA550684	0.151097	37.4111	chloroplast	NC_042725.1/MH708560.1	85	2019-06-25T00:00:00Z
Dendrobium salaccense	Eukaryota;Plants;Land Plants			PRJNA394431	0.151104	37.3054	chloroplast	NC_035332.1/LC193510.1	72	2017-07-14T00:00:00Z
Helianthus annuus	Eukaryota;Plants;Land Plants			PRJNA396063	0.151104	37.6198	chloroplast	Pltd:NC_007977.1/CM007907.1	85	2006-05-03T00:00:00Z
Diplazium dilatatum	Eukaryota;Plants;Land Plants			PRJNA407198	0.151114	43.9046	chloroplast	NC_035850.1/KY427344.1	88	2017-09-13T00:00:00Z
Asplenium prolongatum	Eukaryota;Plants;Land Plants			PRJNA407201	0.151115	40.847	chloroplast	NC_035838.1/KY427332.1	87	2017-09-13T00:00:00Z
Helianthus debilis	Eukaryota;Plants;Land Plants			PRJNA321876	0.151117	37.6106	chloroplast	NC_030173.1/KU312928.1	85	2016-05-19T00:00:00Z
Ligularia mongolica	Eukaryota;Plants;Land Plants			PRJNA492988	0.151118	37.4734	chloroplast	NC_039384.1/MF539932.1	87	2018-09-25T00:00:00Z
Deparia pycnosora	Eukaryota;Plants;Land Plants			PRJNA407123	0.151126	44.009	chloroplast	NC_035845.1/KY427339.1	88	2017-09-13T00:00:00Z
Artemisia montana	Eukaryota;Plants;Land Plants			PRJNA270465	0.15113	37.477	chloroplast	NC_025910.1/KF887960.1	86	2014-12-16T00:00:00Z
Macrothelypteris torresiana	Eukaryota;Plants;Land Plants			PRJNA407165	0.15113	43.0808	chloroplast	NC_035858.1/KY427352.1	88	2017-09-13T00:00:00Z
Stegnogramma sagittifolia	Eukaryota;Plants;Land Plants			PRJNA407182	0.151132	43.0041	chloroplast	NC_035863.1/KY427357.1	87	2017-09-13T00:00:00Z
Ligularia hodgsonii	Eukaryota;Plants;Land Plants			PRJNA492993	0.151136	37.4643	chloroplast	NC_039381.1/MF539929.1	87	2018-10-03T00:00:00Z
Ligularia jaluensis	Eukaryota;Plants;Land Plants			PRJNA492977	0.151148	37.4633	chloroplast	NC_039383.1/MF539931.1	87	2018-10-03T00:00:00Z
Ligularia intermedia	Eukaryota;Plants;Land Plants			PRJNA492984	0.151152	37.4544	chloroplast	NC_039382.1/MF539930.1	87	2018-09-25T00:00:00Z
Phragmipedium longifolium	Eukaryota;Plants;Land Plants			PRJNA300775	0.151157	36.0738	chloroplast	NC_028149.1/KM032625.1	73	2015-11-01T00:00:00Z
Neobalanocarpus heimii	Eukaryota;Plants;Land Plants			PRJNA527588	0.151191	37.4176	chloroplast	NC_041191.1/MH746730.1	84	2019-03-18T00:00:00Z
Artemisia argyi	Eukaryota;Plants;Land Plants			PRJNA339094	0.151192	37.4597	chloroplast	NC_030785.1/KM386991.1	84	2016-08-16T00:00:00Z
Ligularia fischeri	Eukaryota;Plants;Land Plants			PRJNA489901	0.151193	37.4535	chloroplast	NC_039352.1/MG729822.1	87	2018-09-19T00:00:00Z
Piofontia cayambensis	Eukaryota;Plants;Land Plants		SAMN04076333	PRJNA389045	0.151206	37.4853	chloroplast	NC_034886.1/KX063912.1	85	2017-06-02T00:00:00Z
Aconitum episcopale	Eukaryota;Plants;Land Plants			PRJNA483641	0.151214	38.3007	chloroplast	NC_038096.1/MG678801.1	85	2018-07-31T00:00:00Z
Artemisia selengensis	Eukaryota;Plants;Land Plants			PRJNA496159	0.151215	37.4612	chloroplast	NC_039647.1/MH042532.1	88	2018-11-06T00:00:00Z
Colobanthus apetalus	Eukaryota;Plants;Land Plants			PRJNA421517	0.151228	36.6546	chloroplast	NC_036424.1/MF687919.1	82	2017-12-07T00:00:00Z
Isopyrum manshuricum	Eukaryota;Plants;Land Plants			PRJNA532201	0.151243	39.6706	chloroplast	NC_041541.1/MK569496.1	78	2019-04-10T00:00:00Z
Ligularia veitchiana	Eukaryota;Plants;Land Plants			PRJNA492987	0.151253	37.4512	chloroplast	NC_039385.1/MF539933.1	87	2018-09-25T00:00:00Z
Patrinia scabra	Eukaryota;Plants;Land Plants			PRJNA579667	0.151267	38.5795	chloroplast	NC_045048.1/MN524610.1	76	2019-10-29T00:00:00Z
Pericallis hybrida	Eukaryota;Plants;Land Plants			PRJNA353401	0.151267	37.3261	chloroplast	NC_031898.1/KT285537.1	87	2016-11-14T00:00:00Z
Cystopteris chinensis	Eukaryota;Plants;Land Plants			PRJNA407168	0.151269	42.913	chloroplast	NC_035843.1/KY427337.1	88	2017-09-13T00:00:00Z
Vigna radiata var. radiata	Eukaryota;Plants;Land Plants			PRJNA301363	0.151271	35.2348	chloroplast	Pltd:NC_013843.1/	82	2010-02-18T00:00:00Z
Colobanthus quitensis	Eukaryota;Plants;Land Plants			PRJNA298828	0.151276	36.6859	chloroplast	NC_028080.1/KT737383.1	81	2015-10-14T00:00:00Z
Taraxacum brevicorniculatum	Eukaryota;Plants;Land Plants			PRJNA356566	0.151282	37.6786	chloroplast	NC_032056.1/KX198559.1	82	2016-12-07T00:00:00Z
Athyrium anisopterum	Eukaryota;Plants;Land Plants			PRJNA400922	0.151284	43.9842	chloroplast	NC_035738.1/KY419703.1	87	2017-08-31T00:00:00Z
Dendrobium exile	Eukaryota;Plants;Land Plants			PRJNA394432	0.151294	37.6763	chloroplast	NC_035343.1/LC193522.1	72	2017-07-14T00:00:00Z
Taraxacum platycarpum	Eukaryota;Plants;Land Plants			PRJNA348075	0.151307	37.6903	chloroplast	NC_031395.1/KU736960.1	87	2016-10-13T00:00:00Z
Artemisia gmelinii	Eukaryota;Plants;Land Plants			PRJNA348038	0.151318	37.4232	chloroplast	NC_031399.1/KU736962.1	88	2016-10-13T00:00:00Z
Athyrium sinense	Eukaryota;Plants;Land Plants			PRJNA407119	0.151319	43.7592	chloroplast	NC_035839.1/KY427333.1	88	2017-09-13T00:00:00Z
Salvia przewalskii	Eukaryota;Plants;Land Plants			PRJNA527479	0.151319	37.9628	chloroplast	NC_041091.1/MH603953.1	87	2019-03-18T00:00:00Z
Taraxacum obtusifrons	Eukaryota;Plants;Land Plants			PRJNA353458	0.151322	37.6759	chloroplast	NC_031815.1/KX499524.1	85	2016-11-14T00:00:00Z
Taraxacum officinale	Eukaryota;Plants;Land Plants			PRJNA339087	0.151324	37.686	chloroplast	NC_030772.1/KU361241.1	87	2016-08-16T00:00:00Z
Lamium galeobdolon	Eukaryota;Plants;Land Plants			PRJNA435387	0.151328	38.5414	plastid	NC_036972.1/KY562590.1	89	2018-02-22T00:00:00Z
Salvia miltiorrhiza	Eukaryota;Plants;Land Plants			PRJNA191883	0.151328	38.0207	chloroplast	NC_020431.1/JX312195.1	87	2013-03-04T00:00:00Z
Hypochaeris radicata	Eukaryota;Plants;Land Plants			PRJNA573317	0.15133	37.8154	chloroplast	NC_044795.1/MH746729.1	89	2019-09-21T00:00:00Z
Echinacanthus lofouensis	Eukaryota;Plants;Land Plants			PRJNA407157	0.151333	38.7311	chloroplast	NC_035876.1/MF490441.1	85	2017-09-13T00:00:00Z
Torricellia angulata	Eukaryota;Plants;Land Plants			PRJNA350018	0.151336	36.9925	chloroplast	NC_031509.1/KX648359.1	86	2016-10-21T00:00:00Z
Taraxacum kok-saghyz	Eukaryota;Plants;Land Plants			PRJNA356593	0.151338	37.7083	chloroplast	NC_032057.1/KX198560.1	82	2016-12-07T00:00:00Z
Prunella vulgaris	Eukaryota;Plants;Land Plants			PRJNA504219	0.151342	37.9181	chloroplast	NC_039654.1/MG589640.1	87	2018-11-09T00:00:00Z
Rhodiola rosea	Eukaryota;Plants;Land Plants			PRJNA532058	0.151348	37.6893	chloroplast	NC_041671.1/MH410216.1	85	2019-04-10T00:00:00Z
Taraxacum amplum	Eukaryota;Plants;Land Plants			PRJNA353459	0.151349	37.6791	chloroplast	NC_031816.1/KX499525.1	86	2016-11-14T00:00:00Z
Piofontia violacea	Eukaryota;Plants;Land Plants		SAMN04076333	PRJNA387934	0.151387	37.4946	chloroplast	NC_034817.1/KX063891.1	85	2017-05-26T00:00:00Z
Diplostephium glandulosum	Eukaryota;Plants;Land Plants		SAMN04076333	PRJNA389040	0.1514	37.4736	chloroplast	NC_034854.1/KX063866.1	85	2017-06-02T00:00:00Z
Passiflora nitida	Eukaryota;Plants;Land Plants			PRJNA483632	0.1514	36.9624	chloroplast	NC_038123.1/MF807941.1	77	2018-07-31T00:00:00Z
Leucanthemella linearis	Eukaryota;Plants;Land Plants			PRJNA553892	0.151401	37.3379	plastid	NC_043835.1/MG748695.1	89	2019-07-22T00:00:00Z
Passiflora edulis	Eukaryota;Plants;Land Plants		SAMN04272407	PRJNA383240	0.151406	37.0078	chloroplast	NC_034285.1/KX290855.1	76	2017-04-17T00:00:00Z
Praxelis clematidea	Eukaryota;Plants;Land Plants			PRJNA242715	0.15141	37.2333	chloroplast	NC_023833.1/KF922320.1	84	2014-03-26T00:00:00Z
Passiflora laurifolia	Eukaryota;Plants;Land Plants			PRJNA483634	0.151422	37.0177	chloroplast	NC_038121.1/MF807939.1	77	2018-07-31T00:00:00Z
Elaeagnus mollis	Eukaryota;Plants;Land Plants			PRJNA435358	0.151428	36.9839	chloroplast	NC_036932.1/KY511611.1	85	2018-02-22T00:00:00Z
Eriocaulon buergerianum	Eukaryota;Plants;Land Plants			PRJNA541628	0.151434	35.7469	chloroplast	NC_042211.1/MK193813.1	88	2019-05-12T00:00:00Z
Taraxacum mongolicum	Eukaryota;Plants;Land Plants			PRJNA348057	0.151451	37.6676	chloroplast	NC_031396.1/KU736961.1	87	2016-10-13T00:00:00Z
Saussurea tridactyla	Eukaryota;Plants;Land Plants			PRJNA573194	0.151474	37.7378	chloroplast	NC_044730.1/MK953472.1	87	2019-09-21T00:00:00Z
Shorea zeylanica	Eukaryota;Plants;Land Plants			PRJNA524555	0.151486	37.385	chloroplast	NC_040965.1/MH841939.1	80	2019-02-27T00:00:00Z
Diplaziopsis javanica	Eukaryota;Plants;Land Plants			PRJNA407188	0.151496	42.5925	chloroplast	NC_035848.1/KY427342.1	88	2017-09-13T00:00:00Z
Valeriana officinalis	Eukaryota;Plants;Land Plants			PRJNA579627	0.151505	38.4476	chloroplast	NC_045052.1/MN524619.1	76	2019-10-29T00:00:00Z
Passiflora serratodigitata	Eukaryota;Plants;Land Plants			PRJNA483636	0.151509	36.91	chloroplast	NC_038127.1/MF807946.1	77	2018-07-31T00:00:00Z
Dendrobium aphyllum	Eukaryota;Plants;Land Plants			PRJNA394400	0.151524	37.6006	chloroplast	NC_035322.1/LC192953.1	72	2017-07-14T00:00:00Z
Fritillaria usuriensis	Eukaryota;Plants;Land Plants			PRJNA383494	0.151524	36.9545	chloroplast	NC_034369.1/KY646166.1	84	2017-04-19T00:00:00Z
Vatica mangachapoi	Eukaryota;Plants;Land Plants			PRJNA532110	0.151538	37.1821	chloroplast	NC_041485.1/MH716496.1	83	2019-04-10T00:00:00Z
Salvia bulleyana	Eukaryota;Plants;Land Plants			PRJNA527507	0.151547	37.9869	chloroplast	NC_041092.1/MH603954.1	87	2019-03-18T00:00:00Z
Piofontia ochracea	Eukaryota;Plants;Land Plants		SAMN04076333	PRJNA388983	0.151555	37.4524	chloroplast	NC_034903.1/KX063945.1	85	2017-06-02T00:00:00Z
Cyathula capitata	Eukaryota;Plants;Land Plants			PRJNA528070	0.151557	36.4358	plastid	NC_041262.1/MK397864.1	84	2019-03-26T00:00:00Z
Dendrobium denneanum	Eukaryota;Plants;Land Plants			PRJNA394430	0.151565	37.6261	chloroplast	NC_035324.1/LC192955.1	72	2017-07-14T00:00:00Z
Haloxylon ammodendron	Eukaryota;Plants;Land Plants			PRJNA291887	0.15157	36.5811	chloroplast	NC_027668.1/KF534478.1	85	2015-08-04T00:00:00Z
Christella appendiculata	Eukaryota;Plants;Land Plants			PRJNA407161	0.151571	42.4877	chloroplast	NC_035842.1/KY427336.1	88	2017-09-13T00:00:00Z
Silene vulgaris	Eukaryota;Plants;Land Plants			PRJNA574384	0.151583	36.2514	chloroplast	JF715057.1	81	2012-01-12T00:00:00Z
Haloxylon persicum	Eukaryota;Plants;Land Plants			PRJNA291886	0.151586	36.5839	chloroplast	NC_027669.1/KF534479.1	85	2015-08-04T00:00:00Z
Diplazium bellum	Eukaryota;Plants;Land Plants			PRJNA407173	0.151601	42.6389	chloroplast	NC_035849.1/KY427343.1	88	2017-09-13T00:00:00Z
Leonurus japonicus	Eukaryota;Plants;Land Plants			PRJNA483617	0.15161	38.4111	chloroplast	NC_038062.1/MG673937.1	87	2018-07-31T00:00:00Z
Cyrtomium falcatum	Eukaryota;Plants;Land Plants			PRJNA306304	0.151628	42.3286	chloroplast	NC_028705.1/KP189363.1	88	2015-12-17T00:00:00Z
Marsilea crenata	Eukaryota;Plants;Land Plants			PRJNA217254	0.151628	42.2171	chloroplast	NC_022137.1/KC536646.1	89	2013-09-12T00:00:00Z
Silene paradoxa	Eukaryota;Plants;Land Plants			PRJNA236294	0.151632	36.5615	chloroplast	NC_023360.1/KF527887.1	79	2014-01-27T00:00:00Z
Diplostephium oxapampanum	Eukaryota;Plants;Land Plants		SAMN04076333	PRJNA387942	0.151637	37.4295	chloroplast	NC_034815.1/KX063884.1	85	2017-05-26T00:00:00Z
Silene noctiflora	Eukaryota;Plants;Land Plants			PRJNA574386	0.151639	36.5058	chloroplast	JF715056.1	82	2012-01-12T00:00:00Z
Suaeda salsa	Eukaryota;Plants;Land Plants			PRJNA595199	0.151642	36.3956	chloroplast	NC_045302.1/MK867772.1	85	2019-12-12T00:00:00Z
Fritillaria yuzhongensis	Eukaryota;Plants;Land Plants			PRJNA573132	0.151645	36.9692	chloroplast	NC_044630.1/MH244911.1	82	2019-09-21T00:00:00Z
Phedimus kamtschaticus	Eukaryota;Plants;Land Plants			PRJNA479295	0.151652	37.7555	chloroplast	NC_037946.1/MG680403.1	87	2018-07-05T00:00:00Z
Lilium bakerianum	Eukaryota;Plants;Land Plants			PRJNA400017	0.151655	37.0591	chloroplast	NC_035592.1/KY748301.1	84	2017-08-24T00:00:00Z
Diplostephium gynoxyoides	Eukaryota;Plants;Land Plants		SAMN04076333	PRJNA389036	0.151662	37.4497	chloroplast	NC_034862.1/KX063877.1	85	2017-06-02T00:00:00Z
Primula poissonii	Eukaryota;Plants;Land Plants			PRJNA256376	0.151664	37.0187	chloroplast	NC_024543.1/KF753634.1	89	2014-07-29T00:00:00Z
Diplostephium crypteriophyllum	Eukaryota;Plants;Land Plants		SAMN04076333	PRJNA389073	0.151665	37.3943	chloroplast	NC_034881.1/KX063905.1	85	2017-06-02T00:00:00Z
Primula woodwardii	Eukaryota;Plants;Land Plants			PRJNA489902	0.151666	36.9707	chloroplast	NC_039349.1/MG181222.1	86	2018-09-19T00:00:00Z
Clinacanthus nutans	Eukaryota;Plants;Land Plants			PRJNA541618	0.151669	38.3651	chloroplast	NC_042162.1/MH778102.1	83	2019-05-12T00:00:00Z
Eriocaulon decemflorum	Eukaryota;Plants;Land Plants			PRJNA574397	0.151671	35.7643	chloroplast	NC_044895.1/MK639364.1	90	2019-09-26T00:00:00Z
Dendrobium fimbriatum	Eukaryota;Plants;Land Plants			PRJNA394265	0.151673	37.598	chloroplast	NC_035342.1/LC193521.1	72	2017-07-14T00:00:00Z
Apostasia shenzhenica	Eukaryota;Plants;Land Plants			PRJNA504175	0.151676	35.082	chloroplast	NC_039812.1/MG772639.1	81	2018-11-09T00:00:00Z
Alyssum desertorum	Eukaryota;Plants;Land Plants			PRJNA383224	0.151677	36.3377	chloroplast	NC_034299.1/KY498535.1	86	2017-04-17T00:00:00Z
Vigna angularis	Eukaryota;Plants;Land Plants			PRJNA328963	0.151683	35.1859	chloroplast	Pltd:NC_021091.1/	81	2013-05-17T00:00:00Z
Cyrtomium devexiscapulae	Eukaryota;Plants;Land Plants			PRJNA304848	0.151684	42.3308	chloroplast	NC_028542.1/KT599100.1	89	2015-12-03T00:00:00Z
Piofontia huertasii	Eukaryota;Plants;Land Plants		SAMN04076333	PRJNA387940	0.151684	37.4232	chloroplast	NC_034812.1/KX063915.1	85	2017-05-26T00:00:00Z
Dendrobium parishii	Eukaryota;Plants;Land Plants			PRJNA394351	0.151689	37.5789	chloroplast	NC_035339.1/LC193518.1	72	2017-07-14T00:00:00Z
Dysphania ambrosioides	Eukaryota;Plants;Land Plants			PRJNA527482	0.151689	36.9216	chloroplast	NC_041201.1/MK182726.1	84	2019-03-18T00:00:00Z
Salvia chanryoenica	Eukaryota;Plants;Land Plants			PRJNA509844	0.151689	37.952	chloroplast	NC_040121.1/MH261357.1	86	2018-12-14T00:00:00Z
Galeopsis tetrahit	Eukaryota;Plants;Land Plants			PRJNA435281	0.15169	38.4805	plastid	NC_036968.1/KY562586.1	88	2018-02-22T00:00:00Z
Fritillaria taipaiensis	Eukaryota;Plants;Land Plants			PRJNA232920	0.151693	36.9668	chloroplast	NC_023247.1/KC543997.1	84	2014-01-02T00:00:00Z
Cyrtomium fortunei	Eukaryota;Plants;Land Plants			PRJNA453268	0.151699	42.3193	chloroplast	NC_037510.1/MG913607.1	87	2018-04-24T00:00:00Z
Exostigma notobellidiastrum	Eukaryota;Plants;Land Plants		SAMN04076333	PRJNA388993	0.151699	37.3285	chloroplast	NC_034864.1/KX063881.1	85	2017-06-02T00:00:00Z
Passiflora obovata	Eukaryota;Plants;Land Plants			PRJNA553905	0.151701	35.7091	chloroplast	NC_043824.1/MK694931.1	79	2019-07-22T00:00:00Z
Adenolobus garipensis	Eukaryota;Plants;Land Plants			PRJNA430607	0.151705	36.9296	chloroplast	NC_036761.1/KY806280.1	83	2018-01-18T00:00:00Z
Caryopteris mongholica	Eukaryota;Plants;Land Plants		SAMN07225454	PRJNA400982	0.151707	38.2402	chloroplast	NC_035729.1/MF346535.1	86	2017-08-31T00:00:00Z
Dendrobium crepidatum	Eukaryota;Plants;Land Plants			PRJNA394401	0.151717	37.5746	chloroplast	NC_035331.1/LC193509.1	72	2017-07-14T00:00:00Z
Dendrobium jenkinsii	Eukaryota;Plants;Land Plants			PRJNA394388	0.151717	37.6009	chloroplast	NC_035337.1/LC193515.1	72	2017-07-14T00:00:00Z
Hymenasplenium unilaterale	Eukaryota;Plants;Land Plants			PRJNA407171	0.151723	41.9567	chloroplast	NC_035856.1/KY427350.1	87	2017-09-13T00:00:00Z
Oritrophium peruvianum	Eukaryota;Plants;Land Plants		SAMN04076333	PRJNA389066	0.151723	37.3576	chloroplast	NC_034849.1/KX063861.1	85	2017-06-02T00:00:00Z
Agrostemma githago	Eukaryota;Plants;Land Plants			PRJNA236272	0.151733	36.3988	chloroplast	NC_023357.1/KF527884.1	81	2014-01-27T00:00:00Z
Eclipta alba	Eukaryota;Plants;Land Plants			PRJNA504292	0.151733	37.4862	chloroplast	NC_039774.1/MF993496.1	86	2018-11-09T00:00:00Z
Silene latifolia	Eukaryota;Plants;Land Plants			PRJNA81369	0.151736	36.4284	chloroplast	NC_016730.1/JF715055.1	81	2012-01-27T00:00:00Z
Simmondsia chinensis	Eukaryota;Plants;Land Plants			PRJNA524548	0.151737	36.8124	plastid	NC_040935.1/MK397898.1	76	2019-02-27T00:00:00Z
Ocimum tenuiflorum	Eukaryota;Plants;Land Plants			PRJNA555945	0.151744	37.9204	chloroplast	NC_043873.1/MH883642.1	87	2019-07-22T00:00:00Z
Sphagneticola calendulacea	Eukaryota;Plants;Land Plants			PRJNA489905	0.151748	37.4839	chloroplast	NC_039346.1/KY828438.1	86	2018-09-19T00:00:00Z
Eclipta prostrata	Eukaryota;Plants;Land Plants			PRJNA339085	0.151757	37.4849	chloroplast	NC_030773.1/KU361242.1	87	2016-08-16T00:00:00Z
Guizotia abyssinica	Eukaryota;Plants;Land Plants			PRJNA29325	0.151762	37.6227	chloroplast	NC_010601.1/EU549769.1	85	2008-04-15T00:00:00Z
Piofontia floribunda	Eukaryota;Plants;Land Plants		SAMN04076333	PRJNA389042	0.151768	37.4163	chloroplast	NC_034857.1/KX063872.1	85	2017-06-02T00:00:00Z
Ampelopteris prolifera	Eukaryota;Plants;Land Plants			PRJNA407183	0.151772	42.4347	chloroplast	NC_035835.1/KY427329.1	88	2017-09-13T00:00:00Z
Dendrobium wardianum	Eukaryota;Plants;Land Plants			PRJNA394437	0.151788	37.6005	chloroplast	NC_035329.1/LC192961.1	71	2017-07-14T00:00:00Z
Dendrobium chrysanthum	Eukaryota;Plants;Land Plants			PRJNA394396	0.15179	37.5631	chloroplast	NC_035336.1/LC193514.1	72	2017-07-14T00:00:00Z
Veratrum japonicum	Eukaryota;Plants;Land Plants			PRJNA529132	0.151791	37.7453	chloroplast	NC_041306.1/MG940972.1	85	2019-03-26T00:00:00Z
Hopea hainanensis	Eukaryota;Plants;Land Plants			PRJNA573134	0.151795	37.3095	chloroplast	NC_044642.1/MK035707.1	82	2019-09-21T00:00:00Z
Sassafras tzumu	Eukaryota;Plants;Land Plants			PRJNA594700	0.151797	39.1931	chloroplast	NC_045268.1/MG581455.1	80	2019-12-12T00:00:00Z
Piofontia eriophora	Eukaryota;Plants;Land Plants		SAMN04076333	PRJNA389071	0.151802	37.4317	chloroplast	NC_034874.1/KX063896.1	85	2017-06-02T00:00:00Z
Fritillaria persica	Eukaryota;Plants;Land Plants			PRJNA435352	0.151803	36.9966	chloroplast	NC_037039.1/MF947709.1	85	2018-02-22T00:00:00Z
Dendrobium lohohense	Eukaryota;Plants;Land Plants			PRJNA394387	0.151812	37.5636	chloroplast	NC_035338.1/LC193516.1	72	2017-07-14T00:00:00Z
Fritillaria yuminensis	Eukaryota;Plants;Land Plants			PRJNA439048	0.151813	36.9711	chloroplast	NC_037209.1/MG200070.1	83	2018-03-23T00:00:00Z
Lycopodium clavatum	Eukaryota;Plants;Land Plants			PRJNA524558	0.151819	34.4911	plastid	NC_040994.1/MH549642.1	88	2019-02-27T00:00:00Z
Chenopodium ficifolium	Eukaryota;Plants;Land Plants			PRJNA527570	0.151823	37.2631	chloroplast	NC_041200.1/MK182725.1	84	2019-03-18T00:00:00Z
Piofontia revoluta	Eukaryota;Plants;Land Plants		SAMN04076333	PRJNA389008	0.151823	37.3995	chloroplast	NC_034863.1/KX063878.1	85	2017-06-02T00:00:00Z
Pogostemon stellatus	Eukaryota;Plants;Land Plants			PRJNA348087	0.151824	38.2212	chloroplast	NC_031434.1/KP718620.1	87	2016-10-13T00:00:00Z
Westoniella kohkemperi	Eukaryota;Plants;Land Plants		SAMN04076333	PRJNA389064	0.151824	37.3571	chloroplast	NC_034889.1/KX063921.1	85	2017-06-02T00:00:00Z
Dendrobium gratiosissimum	Eukaryota;Plants;Land Plants			PRJNA394404	0.151829	37.5745	chloroplast	NC_035327.1/LC192958.1	72	2017-07-14T00:00:00Z
Dendrobium spatella	Eukaryota;Plants;Land Plants			PRJNA394503	0.151829	37.5818	chloroplast	NC_035333.1/LC193511.1	72	2017-07-14T00:00:00Z
Dendrobium brymerianum	Eukaryota;Plants;Land Plants			PRJNA394434	0.15183	37.6019	chloroplast	NC_035323.1/LC192954.1	72	2017-07-14T00:00:00Z
Echinacea paradoxa	Eukaryota;Plants;Land Plants			PRJNA383845	0.151837	37.589	plastid	NC_034320.1/	85	2017-04-21T00:00:00Z
Fritillaria meleagroides	Eukaryota;Plants;Land Plants			PRJNA435402	0.151846	36.9513	chloroplast	NC_037040.1/MF947710.1	85	2018-02-22T00:00:00Z
Dendrobium henryi	Eukaryota;Plants;Land Plants			PRJNA394352	0.15185	37.5561	chloroplast	NC_035335.1/LC193513.1	72	2017-07-14T00:00:00Z
Fritillaria crassicaulis	Eukaryota;Plants;Land Plants			PRJNA608361	0.151852	36.9761	plastid	NC_045860.1/MK258147.1	84	2020-02-24T00:00:00Z
Echinacea speciosa	Eukaryota;Plants;Land Plants			PRJNA383198	0.15186	37.6083	plastid	NC_034325.1/	85	2017-04-17T00:00:00Z
Echinacea tennesseensis	Eukaryota;Plants;Land Plants			PRJNA383214	0.151877	37.6133	plastid	NC_034326.1/	85	2017-04-17T00:00:00Z
Piofontia jaramilloi	Eukaryota;Plants;Land Plants		SAMN04076333	PRJNA388985	0.151879	37.4311	chloroplast	NC_034894.1/KX063928.1	85	2017-06-02T00:00:00Z
Echinacea pallida	Eukaryota;Plants;Land Plants			PRJNA383216	0.151883	37.5802	plastid	NC_034321.1/	85	2017-04-17T00:00:00Z
Echinacea laevigata	Eukaryota;Plants;Land Plants			PRJNA383222	0.151886	37.5973	plastid	NC_034322.1/	85	2017-04-17T00:00:00Z
Dendrobium falconeri	Eukaryota;Plants;Land Plants			PRJNA394438	0.15189	37.4949	chloroplast	NC_035326.1/LC192957.1	72	2017-07-14T00:00:00Z
Lupinus luteus	Eukaryota;Plants;Land Plants			PRJNA232184	0.151894	36.613	chloroplast	NC_023090.1/KC695666.1	83	2013-12-20T00:00:00Z
Diplostephium oblanceolatum	Eukaryota;Plants;Land Plants		SAMN04076333	PRJNA387945	0.151895	37.412	chloroplast	NC_034830.1/KX063941.1	85	2017-05-26T00:00:00Z
Xanthium sibiricum	Eukaryota;Plants;Land Plants			PRJNA541716	0.151897	37.5162	chloroplast	NC_042232.1/MH473582.1	87	2019-05-12T00:00:00Z
Laennecia sophiifolia	Eukaryota;Plants;Land Plants		SAMN04076333	PRJNA388994	0.151899	37.3452	chloroplast	NC_034877.1/KX063899.1	85	2017-06-02T00:00:00Z
Dioscorea burkilliana	Eukaryota;Plants;Land Plants			PRJNA504094	0.151908	37.1541	chloroplast	NC_039835.1/MG805605.1	84	2018-11-09T00:00:00Z
Scutellaria insignis	Eukaryota;Plants;Land Plants			PRJNA304880	0.151908	38.3772	chloroplast	NC_028533.1/KT750009.1	87	2015-12-03T00:00:00Z
Piofontia tenuifolia	Eukaryota;Plants;Land Plants		SAMN04076333	PRJNA389003	0.151911	37.4252	chloroplast	NC_034860.1/KX063875.1	85	2017-06-02T00:00:00Z
Echinacea atrorubens	Eukaryota;Plants;Land Plants			PRJNA383217	0.151912	37.5777	plastid	NC_034323.1/	85	2017-04-17T00:00:00Z
Echinacea purpurea	Eukaryota;Plants;Land Plants			PRJNA383215	0.151913	37.6011	plastid	NC_034327.1/	85	2017-04-17T00:00:00Z
Enemion raddeanum	Eukaryota;Plants;Land Plants			PRJNA532033	0.151916	39.4949	chloroplast	NC_041535.1/MK569486.1	81	2019-04-10T00:00:00Z
Galinsoga quadriradiata	Eukaryota;Plants;Land Plants			PRJNA353411	0.151917	37.6554	chloroplast	NC_031853.1/KX752097.1	87	2016-12-05T00:00:00Z
Fritillaria walujewii	Eukaryota;Plants;Land Plants			PRJNA439093	0.15192	36.9444	chloroplast	NC_037215.1/MG211820.1	83	2018-03-23T00:00:00Z
Aztecaster matudae	Eukaryota;Plants;Land Plants		SAMN04076333	PRJNA389012	0.151925	37.4092	chloroplast	NC_034898.1/KX063935.1	85	2017-06-02T00:00:00Z
Echinacea sanguinea	Eukaryota;Plants;Land Plants			PRJNA383221	0.151926	37.5532	plastid	NC_034328.1/	85	2017-04-17T00:00:00Z
Diplaziopsis cavaleriana	Eukaryota;Plants;Land Plants			PRJNA407156	0.151934	43.1016	chloroplast	NC_035847.1/KY427341.1	87	2017-09-13T00:00:00Z
Echinacea angustifolia	Eukaryota;Plants;Land Plants			PRJNA383174	0.151935	37.5805	plastid	NC_034324.1/	85	2017-04-17T00:00:00Z
Dendrobium hercoglossum	Eukaryota;Plants;Land Plants			PRJNA394389	0.151939	37.5624	chloroplast	NC_035328.1/LC192959.1	72	2017-07-14T00:00:00Z
Androsace laxa	Eukaryota;Plants;Land Plants			PRJNA489900	0.151942	37.3096	chloroplast	NC_039347.1/MG181220.1	87	2018-09-19T00:00:00Z
Primula chrysochlora	Eukaryota;Plants;Land Plants			PRJNA387828	0.151944	37.0386	chloroplast	NC_034678.1/KX668178.1	86	2017-05-24T00:00:00Z
Dendrobium devonianum	Eukaryota;Plants;Land Plants			PRJNA394405	0.151945	37.5471	chloroplast	NC_035325.1/LC192956.1	72	2017-07-14T00:00:00Z
Pachyrhizus erosus	Eukaryota;Plants;Land Plants			PRJNA278529	0.151947	35.257	chloroplast	NC_026682.1/KJ468100.1	83	2015-03-20T00:00:00Z
Fritillaria sichuanica	Eukaryota;Plants;Land Plants			PRJNA573144	0.151958	36.951	chloroplast	NC_044628.1/MH244907.1	83	2019-09-21T00:00:00Z
Fritillaria verticillata	Eukaryota;Plants;Land Plants			PRJNA439092	0.151959	36.9521	chloroplast	NC_037217.1/MG211823.1	83	2018-03-23T00:00:00Z
Dysphania pumilio	Eukaryota;Plants;Land Plants			PRJNA527521	0.151962	36.9467	chloroplast	NC_041159.1/MH936550.1	84	2019-03-18T00:00:00Z
Patrinia heterophylla	Eukaryota;Plants;Land Plants			PRJNA579668	0.151964	38.6269	chloroplast	NC_045047.1/MN524608.1	77	2019-10-29T00:00:00Z
Blakiella bartsiifolia	Eukaryota;Plants;Land Plants		SAMN04076333	PRJNA389011	0.151965	37.2875	chloroplast	NC_034866.1/KX063886.1	85	2017-06-02T00:00:00Z
Lilium washingtonianum	Eukaryota;Plants;Land Plants			PRJNA479018	0.151967	37.0567	chloroplast	NC_037699.1/MG590100.1	82	2018-07-05T00:00:00Z
Diplostephium barclayanum	Eukaryota;Plants;Land Plants		SAMN04076333	PRJNA389080	0.151974	37.3893	chloroplast	NC_034853.1/KX063865.1	85	2017-06-02T00:00:00Z
Diplostephium ericoides	Eukaryota;Plants;Land Plants		SAMN04076333	PRJNA389010	0.151982	37.3992	chloroplast	NC_034870.1/KX063892.1	85	2017-06-02T00:00:00Z
Fritillaria przewalskii	Eukaryota;Plants;Land Plants			PRJNA573153	0.151983	36.9476	chloroplast	NC_044636.1/MH244908.1	83	2019-09-21T00:00:00Z
Archibaccharis asperifolia	Eukaryota;Plants;Land Plants		SAMN04076333	PRJNA389013	0.151984	37.3717	chloroplast	NC_034848.1/KX063859.1	85	2017-06-02T00:00:00Z
Nymphoides coronata	Eukaryota;Plants;Land Plants			PRJNA532101	0.151985	37.2425	chloroplast	NC_041484.1/MH201539.1	86	2019-04-10T00:00:00Z
Suaeda malacosperma	Eukaryota;Plants;Land Plants			PRJNA487380	0.151989	36.3776	chloroplast	NC_039180.1/MG813535.1	83	2018-08-24T00:00:00Z
Dendrobium scoriarum	Eukaryota;Plants;Land Plants			PRJNA483645	0.15199	37.4696	chloroplast	NC_038079.1/LC348864.1	72	2018-07-31T00:00:00Z
Fritillaria cirrhosa	Eukaryota;Plants;Land Plants			PRJNA259495	0.151991	36.9482	chloroplast	NC_024728.1/KF769143.1	84	2014-08-27T00:00:00Z
Fritillaria dajinensis	Eukaryota;Plants;Land Plants			PRJNA573205	0.151991	36.939	chloroplast	NC_044632.1/MH244913.1	83	2019-09-21T00:00:00Z
Diplostephium hartwegii	Eukaryota;Plants;Land Plants		SAMN04076333	PRJNA383512	0.151994	37.387	chloroplast	NC_034832.1/KX063880.1	85	2017-05-26T00:00:00Z
Iodes cirrhosa	Eukaryota;Plants;Land Plants			PRJNA418536	0.151994	37.4396	chloroplast	NC_036304.1/MF574684.1	89	2017-11-16T00:00:00Z
Fritillaria tortifolia	Eukaryota;Plants;Land Plants			PRJNA439129	0.152005	36.9672	chloroplast	NC_037214.1/MG211819.1	83	2018-03-23T00:00:00Z
Diplostephium goodspeedii	Eukaryota;Plants;Land Plants		SAMN04076333	PRJNA389037	0.152006	37.3939	chloroplast	NC_034901.1/KX063940.1	85	2017-06-02T00:00:00Z
Llerasia caucana	Eukaryota;Plants;Land Plants		SAMN04076333	PRJNA387948	0.152015	37.491	chloroplast	NC_034821.1/KX063908.1	85	2017-05-26T00:00:00Z
Sonchus boulosii	Eukaryota;Plants;Land Plants			PRJNA541705	0.152016	37.6013	chloroplast	NC_042244.1/MK016665.1	88	2019-05-12T00:00:00Z
Dendrobium ellipsophyllum	Eukaryota;Plants;Land Plants			PRJNA394433	0.152026	37.5021	chloroplast	NC_035340.1/LC193519.1	72	2017-07-14T00:00:00Z
Piofontia antioquensis	Eukaryota;Plants;Land Plants		SAMN04076333	PRJNA389082	0.152027	37.3894	chloroplast	NC_034876.1/KX063898.1	85	2017-06-02T00:00:00Z
Piofontia rupestris	Eukaryota;Plants;Land Plants		SAMN04076333	PRJNA388995	0.152027	37.3447	chloroplast	NC_034865.1/KX063882.1	85	2017-06-02T00:00:00Z
Nymphoides simulans	Eukaryota;Plants;Land Plants			PRJNA532228	0.152031	37.1385	chloroplast	NC_041480.1/MH201534.1	86	2019-04-10T00:00:00Z
Ambrosia trifida	Eukaryota;Plants;Land Plants			PRJNA433134	0.15204	37.6217	chloroplast	NC_036810.2/MG029118.2	86	2018-02-06T00:00:00Z
Mentha longifolia	Eukaryota;Plants;Land Plants			PRJNA356608	0.152041	37.8332	chloroplast	NC_032054.1/KU956042.1	87	2016-12-07T00:00:00Z
Fritillaria davidii	Eukaryota;Plants;Land Plants			PRJNA608328	0.152044	36.9715	plastid	NC_045895.1/MK258145.1	85	2020-02-24T00:00:00Z
Piofontia costaricensis	Eukaryota;Plants;Land Plants		SAMN04076333	PRJNA389074	0.152048	37.4092	chloroplast	NC_034879.1/KX063901.1	85	2017-06-02T00:00:00Z
Lagerstroemia subcostata	Eukaryota;Plants;Land Plants			PRJNA389091	0.152049	37.5872	chloroplast	NC_034952.1/KF572029.1	84	2017-06-02T00:00:00Z
Apium graveolens	Eukaryota;Plants;Land Plants			PRJNA527527	0.15205	37.6376	chloroplast	NC_041087.1/MK036045.1	84	2019-03-18T00:00:00Z
Veratrum mengtzeanum	Eukaryota;Plants;Land Plants			PRJNA595250	0.152051	37.7742	chloroplast	NC_045300.1/MN589932.1	85	2019-12-12T00:00:00Z
Dendrobium xichouense	Eukaryota;Plants;Land Plants			PRJNA394502	0.152052	37.5102	chloroplast	NC_035341.1/LC193520.1	72	2017-07-14T00:00:00Z
Dysphania botrys	Eukaryota;Plants;Land Plants			PRJNA541654	0.152055	36.8393	chloroplast	NC_042166.1/MH898873.1	83	2019-05-12T00:00:00Z
Tagetes erecta	Eukaryota;Plants;Land Plants			PRJNA591517	0.152056	37.3711	chloroplast	NC_045211.1/MN462588.1	85	2019-11-25T00:00:00Z
Diplostephium serratifolium	Eukaryota;Plants;Land Plants		SAMN04076333	PRJNA387929	0.15206	37.3885	chloroplast	NC_034826.1/KX063924.1	85	2017-05-26T00:00:00Z
Lilium pensylvanicum	Eukaryota;Plants;Land Plants			PRJNA555966	0.152063	37.0524	chloroplast	NC_043876.1/MK879804.1	84	2019-07-22T00:00:00Z
Fritillaria sinica	Eukaryota;Plants;Land Plants			PRJNA573155	0.152064	36.9279	chloroplast	NC_044631.1/MH244912.1	83	2019-09-21T00:00:00Z
Diplostephium lechleri	Eukaryota;Plants;Land Plants		SAMN04076333	PRJNA387927	0.152067	37.3743	chloroplast	NC_034816.1/KX063868.1	85	2017-05-26T00:00:00Z
Lilium superbum	Eukaryota;Plants;Land Plants			PRJNA280316	0.152069	37.0384	chloroplast	NC_026787.1/KP462883.1	83	2015-04-22T00:00:00Z
Diplostephium cajamarquillense	Eukaryota;Plants;Land Plants		SAMN04076333	PRJNA389079	0.15207	37.3841	chloroplast	NC_034872.1/KX063894.1	85	2017-06-02T00:00:00Z
Sonchus acaulis	Eukaryota;Plants;Land Plants			PRJNA546339	0.152071	37.6456	chloroplast	NC_042382.1/MK033507.1	87	2019-06-06T00:00:00Z
Sonchus canariensis	Eukaryota;Plants;Land Plants			PRJNA546338	0.152075	37.6472	chloroplast	NC_042381.1/MK033506.1	87	2019-06-06T00:00:00Z
Fritillaria pallidiflora	Eukaryota;Plants;Land Plants			PRJNA439130	0.152078	36.9837	chloroplast	NC_037216.1/MG211822.1	83	2018-03-23T00:00:00Z
Dendrobium wilsonii	Eukaryota;Plants;Land Plants			PRJNA394373	0.15208	37.5125	chloroplast	NC_035330.1/LC193508.1	72	2017-07-14T00:00:00Z
Diplostephium espinosae	Eukaryota;Plants;Land Plants		SAMN04076333	PRJNA389043	0.152091	37.3592	chloroplast	NC_034880.1/KX063903.1	85	2017-06-02T00:00:00Z
Mikania micrantha	Eukaryota;Plants;Land Plants			PRJNA353477	0.152092	37.5799	chloroplast	NC_031833.1/KX154571.1	86	2016-11-14T00:00:00Z
Dendrobium candidum	Eukaryota;Plants;Land Plants			PRJNA400975	0.152094	37.4801	plastid	NC_035745.1/KY887994.1	75	2017-08-31T00:00:00Z
Chenopodium quinoa	Eukaryota;Plants;Land Plants			PRJNA394242	0.152099	37.2415	chloroplast	NC_034949.1/	84	2017-06-02T00:00:00Z
Chenopodium quinoa	Eukaryota;Plants;Land Plants			PRJNA527591	0.152099	37.2415	chloroplast	KY419706.1	84	2017-05-24T00:00:00Z
Lilium candidum	Eukaryota;Plants;Land Plants			PRJNA546320	0.152101	37.0247	chloroplast	NC_042399.1/MK753244.1	83	2019-06-06T00:00:00Z
Nymphoides coreana	Eukaryota;Plants;Land Plants			PRJNA532229	0.152104	37.1371	chloroplast	NC_041481.1/MH201536.1	86	2019-04-10T00:00:00Z
Dendrobium bellatulum	Eukaryota;Plants;Land Plants			PRJNA479164	0.152107	37.4789	plastid	NC_037700.1/MG595965.1	75	2018-07-05T00:00:00Z
Dendrobium fanjingshanense	Eukaryota;Plants;Land Plants			PRJNA394504	0.152108	37.5141	chloroplast	NC_035344.1/LC193523.1	72	2017-07-14T00:00:00Z
Suaeda japonica	Eukaryota;Plants;Land Plants			PRJNA550690	0.152109	36.3825	chloroplast	NC_042675.1/MK558824.1	83	2019-06-25T00:00:00Z
Androsace bulleyana	Eukaryota;Plants;Land Plants			PRJNA387833	0.15211	37.2283	chloroplast	NC_034641.1/KU513438.1	87	2017-05-24T00:00:00Z
Diplostephium callilepis	Eukaryota;Plants;Land Plants		SAMN04076333	PRJNA389078	0.15211	37.3749	chloroplast	NC_034856.1/KX063870.1	85	2017-06-02T00:00:00Z
Nymphoides hydrophylla	Eukaryota;Plants;Land Plants			PRJNA532199	0.152111	37.2018	chloroplast	NC_041482.1/MH201537.1	86	2019-04-10T00:00:00Z
Dendrobium aduncum	Eukaryota;Plants;Land Plants			PRJNA483674	0.152112	37.5362	chloroplast	NC_038077.1/LC348858.1	72	2018-07-31T00:00:00Z
Fritillaria karelinii	Eukaryota;Plants;Land Plants			PRJNA439143	0.152112	36.9445	chloroplast	NC_037213.1/MG211818.1	83	2018-03-23T00:00:00Z
Oxalis drummondii	Eukaryota;Plants;Land Plants		SAMN11229851	PRJNA553878	0.152112	36.4948	chloroplast	NC_043802.1/MK726021.1	82	2019-07-22T00:00:00Z
Utricularia gibba	Eukaryota;Plants;Land Plants			PRJNA207602	0.152113	37.5747	chloroplast	NC_021449.1/KC997777.1	87	2013-07-02T00:00:00Z
Christensenia aesculifolia	Eukaryota;Plants;Land Plants			PRJNA573214	0.152115	34.8151	chloroplast	NC_044756.1/MN056350.1	88	2019-09-21T00:00:00Z
Diplostephium azureum	Eukaryota;Plants;Land Plants		SAMN04076333	PRJNA389046	0.152124	37.3426	chloroplast	NC_034882.1/KX063907.1	85	2017-06-02T00:00:00Z
Mentha spicata	Eukaryota;Plants;Land Plants			PRJNA439140	0.152132	37.8474	chloroplast	NC_037247.1/MG256495.1	87	2018-03-23T00:00:00Z
Diplostephium jelskii	Eukaryota;Plants;Land Plants		SAMN04076333	PRJNA387939	0.152142	37.3763	chloroplast	NC_034811.1/KX063860.1	85	2017-05-26T00:00:00Z
Diplostephium gnidioides	Eukaryota;Plants;Land Plants		SAMN04076333	PRJNA389038	0.152144	37.3692	chloroplast	NC_034867.1/KX063887.1	85	2017-06-02T00:00:00Z
Fritillaria hupehensis	Eukaryota;Plants;Land Plants			PRJNA259493	0.152145	36.97	chloroplast	NC_024736.1/KF712486.1	82	2014-08-26T00:00:00Z
Lagerstroemia limii	Eukaryota;Plants;Land Plants			PRJNA550810	0.152153	37.576	chloroplast	NC_042889.1/MK881627.1	85	2019-06-25T00:00:00Z
Paeonia ostii	Eukaryota;Plants;Land Plants			PRJNA433132	0.152153	38.3233	chloroplast	NC_036834.1/MG585274.1	84	2018-02-06T00:00:00Z
Mentha canadensis	Eukaryota;Plants;Land Plants			PRJNA557956	0.152154	37.8143	chloroplast	NC_044082.1/MN047448.1	87	2019-08-02T00:00:00Z
Dioscorea baya	Eukaryota;Plants;Land Plants			PRJNA504207	0.152155	37.145	chloroplast	NC_039850.1/MG805603.1	84	2018-11-09T00:00:00Z
Diplostephium spinulosum	Eukaryota;Plants;Land Plants		SAMN04076333	PRJNA387928	0.152155	37.3849	chloroplast	NC_034823.1/KX063917.1	85	2017-05-26T00:00:00Z
Fritillaria thunbergii	Eukaryota;Plants;Land Plants			PRJNA383496	0.152155	36.9544	chloroplast	NC_034368.1/KY646165.1	85	2017-04-19T00:00:00Z
Homalosorus pycnocarpos	Eukaryota;Plants;Land Plants			PRJNA407197	0.152159	43.2364	chloroplast	NC_035855.1/KY427349.1	88	2017-09-13T00:00:00Z
Chenopodium album	Eukaryota;Plants;Land Plants			PRJNA389017	0.152167	37.2485	chloroplast	NC_034950.1/KY419707.1	84	2017-06-02T00:00:00Z
Piofontia cinerascens	Eukaryota;Plants;Land Plants		SAMN04076333	PRJNA389076	0.152169	37.3775	chloroplast	NC_034850.1/KX063862.1	85	2017-06-02T00:00:00Z
Dioscorea quartiniana	Eukaryota;Plants;Land Plants			PRJNA504206	0.152172	37.0896	chloroplast	NC_039853.1/MG805611.1	83	2018-11-09T00:00:00Z
Piofontia phylicoidea	Eukaryota;Plants;Land Plants		SAMN04076333	PRJNA388982	0.152172	37.3794	chloroplast	NC_034873.1/KX063895.1	85	2017-06-02T00:00:00Z
Piofontia venezuelensis	Eukaryota;Plants;Land Plants		SAMN04076333	PRJNA389002	0.152173	37.3746	chloroplast	NC_034887.1/KX063914.1	85	2017-06-02T00:00:00Z
Lilium philadelphicum	Eukaryota;Plants;Land Plants			PRJNA413211	0.152175	37.0705	chloroplast	NC_035990.1/KY940847.1	83	2017-10-06T00:00:00Z
Dendrobium shixingense	Eukaryota;Plants;Land Plants			PRJNA483571	0.152178	37.4798	chloroplast	NC_038078.1/LC348860.1	72	2018-07-31T00:00:00Z
Piofontia obtusa	Eukaryota;Plants;Land Plants		SAMN04076333	PRJNA387943	0.152179	37.3698	chloroplast	NC_034814.1/KX063920.1	85	2017-05-26T00:00:00Z
Paspalum minus	Eukaryota;Plants;Land Plants			PRJNA495581	0.152184	39.2505	chloroplast	NC_039460.1/MG523995.1	83	2018-10-10T00:00:00Z
Dendrobium catenatum	Eukaryota;Plants;Land Plants			PRJNA453230	0.152185	37.457	chloroplast	Pltd:NC_037361.1/	77	2018-04-24T00:00:00Z
Piofontia rhomboidalis	Eukaryota;Plants;Land Plants		SAMN04076333	PRJNA389007	0.152186	37.3635	chloroplast	NC_034859.1/KX063874.1	85	2017-06-02T00:00:00Z
Lagerstroemia guilinensis	Eukaryota;Plants;Land Plants			PRJNA318207	0.152193	37.6246	chloroplast	NC_029885.1/KU885923.1	85	2016-04-12T00:00:00Z
Sonchus webbii	Eukaryota;Plants;Land Plants			PRJNA546345	0.152194	37.6014	chloroplast	NC_042383.1/MK033508.1	87	2019-06-06T00:00:00Z
Fritillaria anhuiensis	Eukaryota;Plants;Land Plants			PRJNA608411	0.152196	36.9471	plastid	NC_045861.1/MK258148.1	85	2020-02-24T00:00:00Z
Diplostephium hippophae	Eukaryota;Plants;Land Plants		SAMN04076333	PRJNA387941	0.152197	37.3562	chloroplast	NC_034831.1/KX063944.1	85	2017-05-26T00:00:00Z
Piofontia tachirensis	Eukaryota;Plants;Land Plants		SAMN04076333	PRJNA387935	0.152197	37.3621	chloroplast	NC_034825.1/KX063922.1	85	2017-05-26T00:00:00Z
Floscaldasia hypsophila	Eukaryota;Plants;Land Plants		SAMN04076333	PRJNA389009	0.1522	37.3167	chloroplast	NC_034888.1/KX063916.1	85	2017-06-02T00:00:00Z
Impatiens glandulifera	Eukaryota;Plants;Land Plants			PRJNA573241	0.152203	36.8422	chloroplast	NC_044718.1/MK358446.1	85	2019-09-21T00:00:00Z
Lagerstroemia indica	Eukaryota;Plants;Land Plants			PRJNA328625	0.152205	37.5914	chloroplast	NC_030484.1/KX263727.1	86	2016-07-12T00:00:00Z
Diplostephium sagasteguii	Eukaryota;Plants;Land Plants		SAMN04076333	PRJNA387930	0.152214	37.3514	chloroplast	NC_034828.1/KX063932.1	85	2017-05-26T00:00:00Z
Lagerstroemia excelsa	Eukaryota;Plants;Land Plants			PRJNA550777	0.152214	37.5964	chloroplast	NC_042896.1/MK881635.1	85	2019-06-25T00:00:00Z
Ambrosia artemisiifolia	Eukaryota;Plants;Land Plants			PRJNA407136	0.152215	37.6126	chloroplast	NC_035875.1/MF362689.1	87	2017-09-13T00:00:00Z
Piofontia rosmarinifolia	Eukaryota;Plants;Land Plants		SAMN04076333	PRJNA389005	0.152216	37.364	chloroplast	NC_034900.1/KX063939.1	85	2017-06-02T00:00:00Z
Glycine soja	Eukaryota;Plants;Land Plants			PRJNA525136	0.152217	35.3758	chloroplast	Pltd:NC_022868.1/	83	2013-11-19T00:00:00Z
Glycine gracilis	Eukaryota;Plants;Land Plants			PRJNA325998	0.152218	35.373	chloroplast	NC_030329.1/KX029327.1	83	2016-06-17T00:00:00Z
Glycine max	Eukaryota;Plants;Land Plants			PRJNA48389	0.152218	35.373	chloroplast	Pltd:NC_007942.1/	83	2006-04-07T00:00:00Z
Portulaca pilosa	Eukaryota;Plants;Land Plants			PRJNA528049	0.152219	36.2741	plastid	NC_041264.1/MK397890.1	82	2019-03-26T00:00:00Z
Glycine max	Eukaryota;Plants;Land Plants		SAMN09379531	PRJNA475162	0.15222	35.3731	chloroplast	Pltd:CM010429.1	0	2018-08-10T00:00:00Z
Piofontia heterophylla	Eukaryota;Plants;Land Plants		SAMN04076333	PRJNA388987	0.152223	37.3695	chloroplast	NC_034896.1/KX063931.1	85	2017-06-02T00:00:00Z
Elaeagnus macrophylla	Eukaryota;Plants;Land Plants			PRJNA298827	0.152224	37.1019	chloroplast	NC_028066.1/KP211788.1	85	2015-10-14T00:00:00Z
Fritillaria eduardii	Eukaryota;Plants;Land Plants			PRJNA435396	0.152224	36.9876	chloroplast	NC_037038.1/MF947708.1	85	2018-02-22T00:00:00Z
Nymphoides crenata	Eukaryota;Plants;Land Plants			PRJNA532200	0.152225	37.1634	chloroplast	NC_041483.1/MH201538.1	86	2019-04-10T00:00:00Z
Paeonia brownii	Eukaryota;Plants;Land Plants			PRJNA479182	0.152228	38.5468	chloroplast	NC_037880.1/MH191385.1	83	2018-07-05T00:00:00Z
Piofontia glutinosa	Eukaryota;Plants;Land Plants		SAMN04076333	PRJNA389069	0.152229	37.3359	chloroplast	NC_034875.1/KX063897.1	85	2017-06-02T00:00:00Z
Diplostephium pulchrum	Eukaryota;Plants;Land Plants		SAMN04076333	PRJNA387932	0.152236	37.346	chloroplast	NC_034810.1/KX063857.1	85	2017-05-26T00:00:00Z
Atriplex centralasiatica	Eukaryota;Plants;Land Plants			PRJNA595260	0.152237	37.2748	chloroplast	NC_045304.1/MK867774.1	85	2019-12-12T00:00:00Z
Impatiens piufanensis	Eukaryota;Plants;Land Plants			PRJNA453291	0.152238	36.8226	chloroplast	NC_037401.1/MG162586.1	89	2018-04-24T00:00:00Z
Lagerstroemia floribunda	Eukaryota;Plants;Land Plants			PRJNA353441	0.15224	37.7161	chloroplast	NC_031825.1/KX765488.1	85	2016-11-14T00:00:00Z
Dendrobium flexicaule	Eukaryota;Plants;Land Plants			PRJNA483672	0.152242	37.468	chloroplast	NC_038076.1/LC348855.1	72	2018-07-31T00:00:00Z
Piofontia lacunosa	Eukaryota;Plants;Land Plants		SAMN04076333	PRJNA388984	0.152247	37.3636	chloroplast	NC_034878.1/KX063900.1	85	2017-06-02T00:00:00Z
Piofontia camargoana	Eukaryota;Plants;Land Plants		SAMN04076333	PRJNA389077	0.152249	37.3585	chloroplast	NC_034897.1/KX063933.1	85	2017-06-02T00:00:00Z
Dendrobium tosaense	Eukaryota;Plants;Land Plants			PRJNA483663	0.15225	37.47	chloroplast	NC_038075.1/LC348720.1	72	2018-07-31T00:00:00Z
Baccharis aliena	Eukaryota;Plants;Land Plants		SAMN04076333	PRJNA389096	0.152252	37.3565	chloroplast	NC_034855.1/KX063869.1	85	2017-06-02T00:00:00Z
Piofontia schultzii	Eukaryota;Plants;Land Plants		SAMN04076333	PRJNA389004	0.152252	37.3683	chloroplast	NC_034892.1/KX063926.1	85	2017-06-02T00:00:00Z
Saussurea delavayi	Eukaryota;Plants;Land Plants			PRJNA573228	0.152254	37.6785	chloroplast	NC_044733.1/MK953476.1	87	2019-09-21T00:00:00Z
Alternanthera philoxeroides	Eukaryota;Plants;Land Plants			PRJNA550891	0.152255	36.3995	chloroplast	NC_042798.1/MK795965.1	82	2019-06-25T00:00:00Z
Diplostephium foliosissimum	Eukaryota;Plants;Land Plants		SAMN04076333	PRJNA389041	0.15226	37.325	chloroplast	NC_034883.1/KX063909.1	85	2017-06-02T00:00:00Z
Dioscorea togoensis	Eukaryota;Plants;Land Plants			PRJNA504091	0.152264	37.1302	chloroplast	NC_039856.1/MG805615.1	84	2018-11-09T00:00:00Z
Piofontia alveolata	Eukaryota;Plants;Land Plants		SAMN04076333	PRJNA389047	0.152265	37.3691	chloroplast	NC_034847.1/KX063856.1	85	2017-06-02T00:00:00Z
Piofontia romeroi	Eukaryota;Plants;Land Plants		SAMN04076333	PRJNA389006	0.152275	37.3482	chloroplast	NC_034885.1/KX063911.1	85	2017-06-02T00:00:00Z
Piofontia apiculata	Eukaryota;Plants;Land Plants		SAMN04076333	PRJNA389081	0.152277	37.3523	chloroplast	NC_034902.1/KX063943.1	85	2017-06-02T00:00:00Z
Chenopodium quinoa	Eukaryota;Plants;Land Plants		SAMN07354884	PRJNA394587	0.152282	37.229	chloroplast	Pltd:CM008430.1	0	2017-11-06T00:00:00Z
Piofontia juajibioyi	Eukaryota;Plants;Land Plants		SAMN04076333	PRJNA387937	0.152282	37.3518	chloroplast	NC_034822.1/KX063913.1	85	2017-05-26T00:00:00Z
Piofontia mutiscuana	Eukaryota;Plants;Land Plants		SAMN04076333	PRJNA387946	0.152282	37.3583	chloroplast	NC_034827.1/KX063929.1	85	2017-05-26T00:00:00Z
Piofontia oblongifolia	Eukaryota;Plants;Land Plants		SAMN04076333	PRJNA387944	0.152282	37.3557	chloroplast	NC_034818.1/KX063906.1	85	2017-05-26T00:00:00Z
Scutellaria lateriflora	Eukaryota;Plants;Land Plants			PRJNA387970	0.152283	38.3096	plastid	NC_034693.1/	86	2017-05-25T00:00:00Z
Dioscorea hirtiflora	Eukaryota;Plants;Land Plants			PRJNA504261	0.152287	37.1391	chloroplast	NC_039851.1/MG805608.1	84	2018-11-09T00:00:00Z
Lilium duchartrei	Eukaryota;Plants;Land Plants			PRJNA399938	0.152287	37.0347	chloroplast	NC_035591.1/KY748300.1	83	2017-08-24T00:00:00Z
Piofontia rhododendroides	Eukaryota;Plants;Land Plants		SAMN04076333	PRJNA387931	0.152289	37.35	chloroplast	NC_034820.1/KX063885.1	85	2017-05-26T00:00:00Z
Piofontia coriacea	Eukaryota;Plants;Land Plants		SAMN04076333	PRJNA389075	0.15229	37.338	chloroplast	NC_034899.1/KX063937.1	85	2017-06-02T00:00:00Z
Diplostephium haenkei	Eukaryota;Plants;Land Plants		SAMN04076333	PRJNA389039	0.152292	37.3329	chloroplast	NC_034871.1/KX063893.1	85	2017-06-02T00:00:00Z
Lagerstroemia calyculata	Eukaryota;Plants;Land Plants			PRJNA550871	0.152294	37.6502	chloroplast	NC_042897.1/MK881636.1	85	2019-06-25T00:00:00Z
Lagerstroemia tomentosa	Eukaryota;Plants;Land Plants			PRJNA550833	0.152294	37.6541	chloroplast	NC_042893.1/MK881632.1	85	2019-06-25T00:00:00Z
Pluchea indica	Eukaryota;Plants;Land Plants			PRJNA484484	0.152298	37.4995	chloroplast	NC_038194.1/MG452144.1	83	2018-08-03T00:00:00Z
Piofontia colombiana	Eukaryota;Plants;Land Plants		SAMN04076333	PRJNA389044	0.152314	37.3452	chloroplast	NC_034861.1/KX063876.1	85	2017-06-02T00:00:00Z
Veronica nakaiana	Eukaryota;Plants;Land Plants			PRJNA344079	0.152319	37.9322	plastid	NC_031153.1/KT633216.1	88	2016-09-23T00:00:00Z
Silene wilfordii	Eukaryota;Plants;Land Plants			PRJNA394429	0.15232	36.6111	chloroplast	NC_035225.1/KT727929.1	83	2017-07-14T00:00:00Z
Piofontia inesiana	Eukaryota;Plants;Land Plants		SAMN04076333	PRJNA388986	0.152328	37.3431	chloroplast	NC_034895.1/KX063930.1	85	2017-06-02T00:00:00Z
Lagerstroemia intermedia	Eukaryota;Plants;Land Plants			PRJNA387883	0.15233	37.5934	chloroplast	NC_034662.1/KX852427.1	85	2017-05-24T00:00:00Z
Marshallia legrandii	Eukaryota;Plants;Land Plants			PRJNA548740	0.15234	37.2693	chloroplast	NC_042612.1/MH037178.1	85	2019-06-13T00:00:00Z
Neocheiropteris palmatopedata	Eukaryota;Plants;Land Plants			PRJNA573384	0.152344	42.1218	plastid	NC_044794.1/MH707375.1	87	2019-09-21T00:00:00Z
Aster hersileoides	Eukaryota;Plants;Land Plants			PRJNA550714	0.152345	37.3041	chloroplast	NC_042944.1/MK290823.1	87	2019-06-25T00:00:00Z
Erigeron breviscapus	Eukaryota;Plants;Land Plants			PRJNA555938	0.152357	37.1496	chloroplast	NC_043882.1/MK279916.1	86	2019-07-22T00:00:00Z
Baccharis tricuneata	Eukaryota;Plants;Land Plants		SAMN04076333	PRJNA389083	0.15236	37.2978	chloroplast	NC_034868.1/KX063888.1	85	2017-06-02T00:00:00Z
Pteridium aquilinum subsp. aquilinum	Eukaryota;Plants;Land Plants			PRJNA50849	0.152362	41.5261	chloroplast	NC_014348.1/HM535629.1	88	2010-07-27T00:00:00Z
Piofontia frontinensis	Eukaryota;Plants;Land Plants		SAMN04076333	PRJNA389070	0.152365	37.3314	chloroplast	NC_034893.1/KX063927.1	85	2017-06-02T00:00:00Z
Laestadia muscicola	Eukaryota;Plants;Land Plants		SAMN04076333	PRJNA389067	0.152366	37.2426	chloroplast	NC_034858.1/KX063873.1	85	2017-06-02T00:00:00Z
Dioscorea cayennensis	Eukaryota;Plants;Land Plants			PRJNA504276	0.152367	37.0914	chloroplast	NC_039836.1/MG805606.1	84	2018-11-09T00:00:00Z
Glycine cyrtoloba	Eukaryota;Plants;Land Plants			PRJNA210635	0.152381	35.3102	chloroplast	NC_021645.1/KC893632.1	81	2013-07-23T00:00:00Z
Dioscorea schimperiana	Eukaryota;Plants;Land Plants			PRJNA504253	0.152382	37.0103	chloroplast	NC_039855.1/MG805614.1	83	2018-11-09T00:00:00Z
Saussurea salwinensis	Eukaryota;Plants;Land Plants			PRJNA573237	0.152382	37.6823	chloroplast	NC_044731.1/MK953474.1	87	2019-09-21T00:00:00Z
Echinacanthus longzhouensis	Eukaryota;Plants;Land Plants			PRJNA504204	0.152385	38.6416	chloroplast	NC_039678.1/MH045156.1	87	2018-11-09T00:00:00Z
Allium obliquum	Eukaryota;Plants;Land Plants			PRJNA439123	0.152387	36.7899	chloroplast	NC_037199.1/MG670111.1	84	2018-03-23T00:00:00Z
Saussurea leontodontoides	Eukaryota;Plants;Land Plants			PRJNA573227	0.152387	37.6883	chloroplast	NC_044734.1/MK953477.1	87	2019-09-21T00:00:00Z
Ocimum basilicum	Eukaryota;Plants;Land Plants			PRJNA390957	0.152407	37.8355	chloroplast	NC_035143.1/KY623639.1	84	2017-06-27T00:00:00Z
Iris sanguinea	Eukaryota;Plants;Land Plants			PRJNA311897	0.152408	38.0452	chloroplast	NC_029227.1/KT626943.1	87	2016-02-12T00:00:00Z
Cardiocrinum cordatum	Eukaryota;Plants;Land Plants			PRJNA377065	0.15241	37.1052	plastid	NC_033898.1/KX575837.1	82	2017-03-06T00:00:00Z
Saussurea pseudoleucoma	Eukaryota;Plants;Land Plants			PRJNA573115	0.152412	37.6854	chloroplast	NC_044728.1/MK953469.1	87	2019-09-21T00:00:00Z
Vigna unguiculata	Eukaryota;Plants;Land Plants			PRJNA521068	0.152415	35.2413	chloroplast	Pltd:NC_018051.1/	84	2012-07-02T00:00:00Z
Cardiocrinum cathayanum	Eukaryota;Plants;Land Plants			PRJNA377064	0.152416	37.0821	plastid	NC_033897.1/KX575836.1	81	2017-03-06T00:00:00Z
Scrophularia takesimensis	Eukaryota;Plants;Land Plants			PRJNA273196	0.152425	38.0515	plastid	NC_026202.1/KM590983.1	88	2015-02-04T00:00:00Z
Parastrephia quadrangularis	Eukaryota;Plants;Land Plants		SAMN04076333	PRJNA389065	0.152427	37.3084	chloroplast	NC_034890.1/KX063923.1	85	2017-06-02T00:00:00Z
Helichrysum italicum	Eukaryota;Plants;Land Plants			PRJNA532138	0.152431	37.1624	chloroplast	NC_041458.1/MK089797.1	85	2019-04-10T00:00:00Z
Fritillaria maximowiczii	Eukaryota;Plants;Land Plants			PRJNA608327	0.152434	37.0613	plastid	NC_045894.1/MK258138.1	85	2020-02-24T00:00:00Z
Lagerstroemia fauriei	Eukaryota;Plants;Land Plants			PRJNA317893	0.15244	37.6056	chloroplast	NC_029808.1/KT358807.1	85	2016-04-09T00:00:00Z
Saussurea kingii	Eukaryota;Plants;Land Plants			PRJNA573128	0.152444	37.6322	chloroplast	NC_044736.1/MK953479.1	87	2019-09-21T00:00:00Z
Dioscorea sansibarensis	Eukaryota;Plants;Land Plants			PRJNA504092	0.152445	37.155	chloroplast	NC_039838.1/MG805613.1	84	2018-11-09T00:00:00Z
Aster altaicus	Eukaryota;Plants;Land Plants			PRJNA390366	0.152446	37.3424	chloroplast	NC_034996.1/KX352465.1	84	2017-06-13T00:00:00Z
Saussurea chabyoungsanica	Eukaryota;Plants;Land Plants			PRJNA430646	0.152446	37.6651	chloroplast	NC_036677.1/KX622799.1	87	2018-01-18T00:00:00Z
Diplostephium juniperinum	Eukaryota;Plants;Land Plants		SAMN04076333	PRJNA387936	0.152454	37.3398	chloroplast	NC_034813.1/KX063883.1	85	2017-05-26T00:00:00Z
Aphelandra knappiae	Eukaryota;Plants;Land Plants			PRJNA532102	0.152457	38.46	chloroplast	NC_041424.1/MH909777.1	86	2019-04-10T00:00:00Z
Diplostephium empetrifolium	Eukaryota;Plants;Land Plants		SAMN04076333	PRJNA389072	0.152461	37.3466	chloroplast	NC_034891.1/KX063925.1	85	2017-06-02T00:00:00Z
Pogostemon cablin	Eukaryota;Plants;Land Plants			PRJNA550855	0.152461	38.2413	chloroplast	NC_042796.1/MF287372.1	87	2019-06-25T00:00:00Z
Saussurea hookeri	Eukaryota;Plants;Land Plants			PRJNA573129	0.152461	37.6903	chloroplast	NC_044739.1/MK952740.1	87	2019-09-21T00:00:00Z
Lagenophora cuchumatanica	Eukaryota;Plants;Land Plants		SAMN04076333	PRJNA387933	0.152462	37.2486	chloroplast	NC_034819.1/KX063879.1	85	2017-05-26T00:00:00Z
Salvia rosmarinus	Eukaryota;Plants;Land Plants			PRJNA287416	0.152462	37.9931	chloroplast	NC_027259.1/KR232566.1	86	2015-06-18T00:00:00Z
Dioscorea praehensilis	Eukaryota;Plants;Land Plants			PRJNA504093	0.152466	37.0889	chloroplast	NC_039837.1/MG805609.1	84	2018-11-09T00:00:00Z
Plagiorhegma dubium	Eukaryota;Plants;Land Plants			PRJNA483669	0.152468	38.1457	chloroplast	NC_038103.1/MG397139.1	84	2018-07-31T00:00:00Z
Dioscorea dumetorum	Eukaryota;Plants;Land Plants			PRJNA504254	0.152475	37.0041	chloroplast	NC_039691.1/MG805607.1	84	2018-11-09T00:00:00Z
Lagerstroemia speciosa	Eukaryota;Plants;Land Plants			PRJNA348083	0.152476	37.581	chloroplast	NC_031414.1/KU821692.1	85	2016-10-13T00:00:00Z
Asplenium pekinense	Eukaryota;Plants;Land Plants			PRJNA407150	0.152479	41.1617	chloroplast	NC_035837.1/KY427331.1	88	2017-09-13T00:00:00Z
Davallia solida var. fejeensis	Eukaryota;Plants;Land Plants			PRJNA573232	0.152479	41.2332	chloroplast	NC_044688.1/MK705750.1	89	2019-09-21T00:00:00Z
Saussurea polylepis	Eukaryota;Plants;Land Plants			PRJNA422848	0.152488	37.6594	chloroplast	NC_036490.1/MF695711.1	87	2017-12-18T00:00:00Z
Saussurea involucrata	Eukaryota;Plants;Land Plants			PRJNA313712	0.15249	37.6707	chloroplast	NC_029465.1/KU041648.1	90	2016-03-01T00:00:00Z
Dendrobium loddigesii	Eukaryota;Plants;Land Plants			PRJNA420549	0.152493	37.3775	chloroplast	NC_036355.1/LC317044.1	68	2017-12-01T00:00:00Z
Saussurea tsoongii	Eukaryota;Plants;Land Plants			PRJNA573246	0.152501	37.6634	chloroplast	NC_044737.1/MK953480.1	87	2019-09-21T00:00:00Z
Lindera neesiana	Eukaryota;Plants;Land Plants			PRJNA594679	0.152502	39.1667	chloroplast	NC_045261.1/MG581447.1	81	2019-12-12T00:00:00Z
Primula knuthiana	Eukaryota;Plants;Land Plants			PRJNA489911	0.152502	36.9903	chloroplast	NC_039350.1/MG181223.1	86	2018-09-19T00:00:00Z
Eschenbachia blinii	Eukaryota;Plants;Land Plants			PRJNA473547	0.152503	37.3691	chloroplast	NC_037605.1/KX085421.1	87	2018-06-09T00:00:00Z
Isotoma hypocrateriformis	Eukaryota;Plants;Land Plants			PRJNA394461	0.152505	39.3784	plastid	NC_035363.1/MF061175.1	73	2017-07-14T00:00:00Z
Saussurea durgae	Eukaryota;Plants;Land Plants			PRJNA573117	0.152506	37.6982	chloroplast	NC_044735.1/MK953478.1	87	2019-09-21T00:00:00Z
Glycine canescens	Eukaryota;Plants;Land Plants			PRJNA210634	0.152518	35.3283	chloroplast	NC_021647.1/KC893635.1	82	2013-07-23T00:00:00Z
Lagerstroemia siamica	Eukaryota;Plants;Land Plants			PRJNA550870	0.152519	37.5763	chloroplast	NC_042890.1/MK881628.1	85	2019-06-25T00:00:00Z
Lagerstroemia venusta	Eukaryota;Plants;Land Plants			PRJNA550869	0.152521	37.5706	chloroplast	NC_042892.1/MK881630.1	85	2019-06-25T00:00:00Z
Allium chinense	Eukaryota;Plants;Land Plants			PRJNA555981	0.152525	36.7645	chloroplast	NC_043922.1/MK096442.1	87	2019-07-22T00:00:00Z
Saussurea lhozhagensis	Eukaryota;Plants;Land Plants			PRJNA573116	0.152527	37.6694	chloroplast	NC_044729.1/MK953470.1	87	2019-09-21T00:00:00Z
Cyamopsis tetragonoloba	Eukaryota;Plants;Land Plants			PRJNA479187	0.15253	35.3603	chloroplast	NC_037714.1/MF352008.1	88	2018-07-05T00:00:00Z
Diplostephium meyenii	Eukaryota;Plants;Land Plants		SAMN04076333	PRJNA387947	0.152537	37.3188	chloroplast	NC_034824.1/KX063919.1	85	2017-05-26T00:00:00Z
Dioscorea preussii	Eukaryota;Plants;Land Plants			PRJNA504239	0.152539	37.0502	chloroplast	NC_039852.1/MG805610.1	84	2018-11-09T00:00:00Z
Saussurea obvallata	Eukaryota;Plants;Land Plants			PRJNA573127	0.15254	37.6891	chloroplast	NC_044726.1/MK953466.1	87	2019-09-21T00:00:00Z
Lobularia libyca	Eukaryota;Plants;Land Plants			PRJNA399913	0.152542	36.4929	chloroplast	NC_035513.1/KY912029.1	86	2017-08-24T00:00:00Z
Cynara baetica	Eukaryota;Plants;Land Plants			PRJNA298194	0.152548	37.7108	chloroplast	NC_028005.1/KP842706.1	87	2015-10-08T00:00:00Z
Dioscorea sagittifolia	Eukaryota;Plants;Land Plants			PRJNA504205	0.152549	37.0701	chloroplast	NC_039854.1/MG805612.1	84	2018-11-09T00:00:00Z
Cynara cornigera	Eukaryota;Plants;Land Plants			PRJNA298204	0.15255	37.7083	chloroplast	NC_028006.1/KP842707.1	87	2015-10-08T00:00:00Z
Goniophlebium niponicum	Eukaryota;Plants;Land Plants			PRJNA514759	0.152551	42.3904	chloroplast	NC_040221.1/MH319944.1	88	2019-01-11T00:00:00Z
Lindera floribunda	Eukaryota;Plants;Land Plants			PRJNA594680	0.152551	39.1685	chloroplast	NC_045257.1/MG581442.1	81	2019-12-12T00:00:00Z
Machilus thunbergii	Eukaryota;Plants;Land Plants			PRJNA484496	0.152551	39.1653	chloroplast	NC_038204.1/MH178404.1	81	2018-08-03T00:00:00Z
Dioscorea abyssinica	Eukaryota;Plants;Land Plants			PRJNA504111	0.152552	37.0759	chloroplast	NC_039834.1/MG805602.1	84	2018-11-09T00:00:00Z
Marshallia obovata	Eukaryota;Plants;Land Plants			PRJNA548731	0.152553	37.2611	chloroplast	NC_042607.1/MH037169.1	85	2019-06-13T00:00:00Z
Diplostephium cinereum	Eukaryota;Plants;Land Plants		SAMN04076333	PRJNA389097	0.152554	37.314	chloroplast	NC_034869.1/KX063889.1	85	2017-06-02T00:00:00Z
Parasassafras confertiflorum	Eukaryota;Plants;Land Plants			PRJNA550844	0.152555	39.1478	chloroplast	NC_042696.1/MH729378.1	81	2019-06-25T00:00:00Z
Cirsium eriophorum	Eukaryota;Plants;Land Plants			PRJNA435374	0.152557	37.7066	plastid	NC_036966.1/KY562584.1	88	2018-02-22T00:00:00Z
Centaurea diffusa	Eukaryota;Plants;Land Plants			PRJNA252491	0.152559	37.731	chloroplast	NC_024286.1/KJ690264.1	90	2014-06-11T00:00:00Z
Cirsium vulgare	Eukaryota;Plants;Land Plants			PRJNA435298	0.152567	37.6949	plastid	NC_036967.1/KY562585.1	88	2018-02-22T00:00:00Z
Lilium amabile	Eukaryota;Plants;Land Plants			PRJNA413212	0.152567	37.025	chloroplast	NC_035988.1/KY940845.1	83	2017-10-06T00:00:00Z
Cinnamomum camphora	Eukaryota;Plants;Land Plants			PRJNA407174	0.15257	39.1394	chloroplast	NC_035882.1/MF156716.1	84	2017-09-13T00:00:00Z
Pedicularis ishidoyana	Eukaryota;Plants;Land Plants			PRJNA316235	0.152571	38.0937	chloroplast	NC_029700.1/KU170194.1	77	2016-03-28T00:00:00Z
Lilium lancifolium	Eukaryota;Plants;Land Plants			PRJNA399989	0.152574	37.0253	chloroplast	NC_035589.1/KY748297.1	85	2017-08-24T00:00:00Z
Cirsium rhinoceros	Eukaryota;Plants;Land Plants			PRJNA563450	0.152576	37.7137	chloroplast	NC_044423.1/MK922360.1	88	2019-09-06T00:00:00Z
Cynara humilis	Eukaryota;Plants;Land Plants			PRJNA284073	0.152585	37.7049	chloroplast	NC_027113.1/KP299292.1	87	2015-05-14T00:00:00Z
Perilla citriodora	Eukaryota;Plants;Land Plants			PRJNA339064	0.152588	37.826	chloroplast	NC_030755.1/KT220684.1	88	2016-08-16T00:00:00Z
Lilium distichum	Eukaryota;Plants;Land Plants			PRJNA319085	0.152598	37.0634	chloroplast	NC_029937.1/KT376489.1	85	2016-04-20T00:00:00Z
Scrophularia dentata	Eukaryota;Plants;Land Plants		SAMN07599848	PRJNA435356	0.1526	37.9613	chloroplast	NC_036942.1/MF861202.1	87	2018-02-22T00:00:00Z
Paeonia decomposita	Eukaryota;Plants;Land Plants			PRJNA495572	0.152601	38.3805	chloroplast	NC_039425.1/MG571273.1	84	2018-10-10T00:00:00Z
Perilla frutescens	Eukaryota;Plants;Land Plants			PRJNA339088	0.152602	37.8239	chloroplast	NC_030756.1/KT220690.1	88	2016-08-16T00:00:00Z
Lilium cernuum	Eukaryota;Plants;Land Plants			PRJNA388992	0.152604	37.0148	chloroplast	NC_034840.1/KX354692.1	84	2017-06-02T00:00:00Z
Dioscorea elephantipes	Eukaryota;Plants;Land Plants			PRJNA19935	0.152609	37.1518	chloroplast	NC_009601.1/EF380353.1	84	2007-06-22T00:00:00Z
Saussurea japonica	Eukaryota;Plants;Land Plants			PRJNA573239	0.152612	37.6537	chloroplast	NC_044738.1/MK953481.1	87	2019-09-21T00:00:00Z
Glycine stenophita	Eukaryota;Plants;Land Plants			PRJNA210627	0.152618	35.3163	chloroplast	NC_021646.1/KC893634.1	82	2013-07-23T00:00:00Z
Machilus pauhoi	Eukaryota;Plants;Land Plants			PRJNA484438	0.152621	39.1624	chloroplast	NC_038203.1/MH178403.1	81	2018-08-03T00:00:00Z
Marshallia graminifolia	Eukaryota;Plants;Land Plants			PRJNA548741	0.152621	37.2603	chloroplast	NC_042605.1/MH037167.1	86	2019-06-13T00:00:00Z
Machilus yunnanensis	Eukaryota;Plants;Land Plants			PRJNA298800	0.152622	39.1628	chloroplast	NC_028073.1/KT348516.1	81	2015-10-14T00:00:00Z
Saussurea pubifolia	Eukaryota;Plants;Land Plants			PRJNA573238	0.152622	37.6767	chloroplast	NC_044727.1/MK953467.1	87	2019-09-21T00:00:00Z
Lilium callosum	Eukaryota;Plants;Land Plants			PRJNA413215	0.152626	37.0147	chloroplast	NC_035989.1/KY940846.1	83	2017-10-06T00:00:00Z
Rhachidosorus consimilis	Eukaryota;Plants;Land Plants			PRJNA407155	0.152642	43.4664	chloroplast	NC_035862.1/KY427356.1	88	2017-09-13T00:00:00Z
Echinacanthus longipes	Eukaryota;Plants;Land Plants			PRJNA504157	0.152644	38.618	chloroplast	NC_039761.1/MH045155.1	87	2018-11-09T00:00:00Z
Anoectochilus emeiensis	Eukaryota;Plants;Land Plants			PRJNA376957	0.15265	36.8745	chloroplast	NC_033895.1/LC057212.1	81	2017-02-27T00:00:00Z
Cardiocrinum giganteum	Eukaryota;Plants;Land Plants			PRJNA377063	0.152653	37.0677	plastid	NC_033896.1/KX528334.1	82	2017-02-27T00:00:00Z
Lilium formosanum	Eukaryota;Plants;Land Plants			PRJNA546331	0.152653	37.0219	chloroplast	NC_042398.1/MK753243.1	84	2019-06-06T00:00:00Z
Lilium hansonii	Eukaryota;Plants;Land Plants			PRJNA291893	0.152655	37.0024	chloroplast	NC_027674.1/KM103364.1	83	2015-08-04T00:00:00Z
Perilla setoyensis	Eukaryota;Plants;Land Plants			PRJNA339081	0.152656	37.8092	chloroplast	NC_030757.1/KT220691.1	88	2016-08-16T00:00:00Z
Saussurea przewalskii	Eukaryota;Plants;Land Plants			PRJNA573160	0.152658	37.6744	chloroplast	NC_044732.1/MK953475.1	87	2019-09-21T00:00:00Z
Lobularia maritima	Eukaryota;Plants;Land Plants			PRJNA19221	0.152659	36.5121	chloroplast	NC_009274.1/AP009375.1	84	2007-04-03T00:00:00Z
Marshallia mohrii	Eukaryota;Plants;Land Plants			PRJNA548739	0.15266	37.2776	chloroplast	NC_042610.1/MH037173.1	86	2019-06-13T00:00:00Z
Marshallia trinervia	Eukaryota;Plants;Land Plants			PRJNA548729	0.152661	37.278	chloroplast	NC_042606.1/MH037168.1	86	2019-06-13T00:00:00Z
Lindera aggregata	Eukaryota;Plants;Land Plants			PRJNA594668	0.152664	39.1677	chloroplast	NC_045252.1/MG581437.1	81	2019-12-12T00:00:00Z
Lindera communis	Eukaryota;Plants;Land Plants			PRJNA594697	0.152668	39.2138	chloroplast	NC_045255.1/MG581440.1	81	2019-12-12T00:00:00Z
Echinacanthus attenuatus	Eukaryota;Plants;Land Plants			PRJNA504165	0.152672	38.2591	chloroplast	NC_039762.1/MH045157.1	86	2018-11-09T00:00:00Z
Cinnamomum micranthum	Eukaryota;Plants;Land Plants			PRJNA407144	0.152675	39.1308	chloroplast	NC_035802.1/KT833081.1	79	2017-09-13T00:00:00Z
Lilium brownii	Eukaryota;Plants;Land Plants			PRJNA399939	0.152677	37.0075	chloroplast	NC_035588.1/KY748296.1	84	2017-08-24T00:00:00Z
Marshallia grandiflora	Eukaryota;Plants;Land Plants			PRJNA548730	0.152677	37.2682	chloroplast	NC_042608.1/MH037171.1	85	2019-06-13T00:00:00Z
Paeonia veitchii	Eukaryota;Plants;Land Plants			PRJNA359035	0.152682	38.4158	chloroplast	NC_032401.1/KT894821.1	84	2016-12-27T00:00:00Z
Lilium bulbiferum	Eukaryota;Plants;Land Plants			PRJNA453205	0.152686	37.0126	chloroplast	NC_037517.1/MG574829.1	82	2018-04-24T00:00:00Z
Paeonia ludlowii	Eukaryota;Plants;Land Plants			PRJNA400063	0.152687	38.4381	chloroplast	NC_035623.1/KY817592.1	87	2017-08-28T00:00:00Z
Youngia denticulata	Eukaryota;Plants;Land Plants			PRJNA541690	0.152689	37.7624	chloroplast	NC_042149.1/MK622902.1	87	2019-05-12T00:00:00Z
Goodyera velutina	Eukaryota;Plants;Land Plants			PRJNA313646	0.152692	36.9057	chloroplast	NC_029365.1/KT886432.1	79	2016-03-01T00:00:00Z
Lindera chunii	Eukaryota;Plants;Land Plants			PRJNA594672	0.152694	39.1849	chloroplast	NC_045254.1/MG581439.1	81	2019-12-12T00:00:00Z
Paeonia obovata	Eukaryota;Plants;Land Plants			PRJNA272009	0.152698	38.4353	chloroplast	NC_026076.1/KJ206533.1	83	2015-01-13T00:00:00Z
Hemiphragma heterophyllum	Eukaryota;Plants;Land Plants			PRJNA595334	0.1527	38.0897	chloroplast	NC_045398.1/MN383191.1	86	2019-12-12T00:00:00Z
Spergula arvensis	Eukaryota;Plants;Land Plants			PRJNA528060	0.152703	36.8297	plastid	NC_041240.1/MK330003.1	85	2019-03-26T00:00:00Z
Pogostemon yatabeanus	Eukaryota;Plants;Land Plants			PRJNA347991	0.152707	38.162	chloroplast	NC_031433.1/KP718618.1	87	2016-10-13T00:00:00Z
Arctium lappa	Eukaryota;Plants;Land Plants			PRJNA550932	0.152708	37.683	chloroplast	NC_042724.1/MH671331.1	87	2019-06-25T00:00:00Z
Lilium tsingtauense	Eukaryota;Plants;Land Plants			PRJNA291892	0.15271	36.9969	chloroplast	NC_027675.1/KM103365.1	84	2015-08-04T00:00:00Z
Galium aparine	Eukaryota;Plants;Land Plants			PRJNA435322	0.152712	37.2793	plastid	NC_036969.1/KY562587.1	84	2018-02-22T00:00:00Z
Lilium sp. KHK-2014	Eukaryota;Plants;Land Plants			PRJNA291885	0.152715	36.9957	chloroplast	NC_027679.1/KM103383.1	83	2015-08-04T00:00:00Z
Anaphalis sinica	Eukaryota;Plants;Land Plants			PRJNA387777	0.152718	37.1194	chloroplast	NC_034648.1/KX148081.1	85	2017-05-24T00:00:00Z
Lilium pardanthinum	Eukaryota;Plants;Land Plants			PRJNA484473	0.152718	36.955	chloroplast	NC_038193.1/MG704135.1	83	2018-08-03T00:00:00Z
Litsea japonica	Eukaryota;Plants;Land Plants			PRJNA594674	0.152718	39.1421	chloroplast	NC_045267.1/MG581454.1	81	2019-12-12T00:00:00Z
Machilus balansae	Eukaryota;Plants;Land Plants			PRJNA298811	0.152721	39.1505	chloroplast	NC_028074.1/KT348517.1	80	2015-10-14T00:00:00Z
Persea americana	Eukaryota;Plants;Land Plants			PRJNA344273	0.152723	39.1041	chloroplast	NC_031189.1/KX437771.1	81	2016-09-23T00:00:00Z
Actinodaphne lancifolia	Eukaryota;Plants;Land Plants			PRJNA594682	0.152728	39.1159	chloroplast	NC_045251.1/MG581436.1	81	2019-12-12T00:00:00Z
Glycine tomentella	Eukaryota;Plants;Land Plants			PRJNA210413	0.152728	35.3262	chloroplast	NC_021636.1/KC893633.1	82	2013-07-03T00:00:00Z
Lindera praecox	Eukaryota;Plants;Land Plants			PRJNA594689	0.152728	39.1559	chloroplast	NC_045263.1/MG581449.1	81	2019-12-12T00:00:00Z
Cinnamomum yabunikkei	Eukaryota;Plants;Land Plants			PRJNA574358	0.152731	39.1551	chloroplast	NC_044864.1/MG717939.1	79	2019-09-26T00:00:00Z
Scutellaria baicalensis	Eukaryota;Plants;Land Plants			PRJNA287399	0.152731	38.3766	chloroplast	NC_027262.1/KR233163.2	87	2015-06-18T00:00:00Z
Allium ampeloprasum	Eukaryota;Plants;Land Plants			PRJNA573216	0.152732	36.7271	chloroplast	NC_044666.1/MK820026.1	81	2019-09-21T00:00:00Z
Paeonia lactiflora	Eukaryota;Plants;Land Plants			PRJNA524556	0.152747	38.444	chloroplast	NC_040983.1/MG897127.1	84	2019-02-27T00:00:00Z
Laurus nobilis	Eukaryota;Plants;Land Plants			PRJNA387980	0.15275	39.1227	plastid	NC_034700.1/	80	2017-05-25T00:00:00Z
Primula persimilis	Eukaryota;Plants;Land Plants			PRJNA383196	0.152756	37.2182	chloroplast	NC_034331.1/KX641757.1	85	2017-04-17T00:00:00Z
Marshallia caespitosa	Eukaryota;Plants;Land Plants			PRJNA548735	0.15276	37.2689	chloroplast	NC_042611.1/MH037175.1	86	2019-06-13T00:00:00Z
Lindera megaphylla	Eukaryota;Plants;Land Plants			PRJNA594696	0.152762	39.1537	chloroplast	NC_045258.1/MG581444.1	80	2019-12-12T00:00:00Z
Lindera nacusua	Eukaryota;Plants;Land Plants			PRJNA594692	0.152762	39.2146	chloroplast	NC_045260.1/MG581446.1	81	2019-12-12T00:00:00Z
Cinnamomum aromaticum	Eukaryota;Plants;Land Plants			PRJNA609517	0.152763	39.1528	chloroplast	NC_046019.1/MN812496.1	82	2020-03-07T00:00:00Z
Sarcobatus vermiculatus	Eukaryota;Plants;Land Plants			PRJNA524598	0.152763	36.1684	plastid	NC_040932.1/MK397895.1	85	2019-02-27T00:00:00Z
Lactuca sativa	Eukaryota;Plants;Land Plants			PRJNA432228	0.152765	37.5492	chloroplast	Pltd:NC_007578.1/	84	2005-11-08T00:00:00Z
Cinnamomum verum	Eukaryota;Plants;Land Plants			PRJNA394263	0.152766	39.1579	chloroplast	NC_035236.1/KY635878.1	81	2017-07-14T00:00:00Z
Lindera obtusiloba	Eukaryota;Plants;Land Plants			PRJNA594694	0.152772	39.1184	chloroplast	NC_045262.1/MG581448.1	81	2019-12-12T00:00:00Z
Lindera glauca	Eukaryota;Plants;Land Plants			PRJNA412064	0.15278	39.1733	chloroplast	NC_035953.1/MF188124.1	81	2017-09-28T00:00:00Z
Bencomia exstipulata	Eukaryota;Plants;Land Plants			PRJNA508134	0.152781	37.2199	chloroplast	NC_039924.1/MG682353.1	84	2018-12-03T00:00:00Z
Phoebe neurantha	Eukaryota;Plants;Land Plants			PRJNA496161	0.152782	39.1551	chloroplast	NC_039620.1/MH394352.1	82	2018-11-06T00:00:00Z
Glycine syndetika	Eukaryota;Plants;Land Plants			PRJNA210629	0.152783	35.3246	chloroplast	NC_021650.1/KC893638.1	82	2013-07-23T00:00:00Z
Lilium henricii	Eukaryota;Plants;Land Plants			PRJNA495526	0.152784	36.996	plastid	NC_039436.1/MH136807.1	83	2018-10-10T00:00:00Z
Papaver orientale	Eukaryota;Plants;Land Plants			PRJNA479171	0.152799	38.637	chloroplast	NC_037832.1/MF943222.1	85	2018-07-05T00:00:00Z
Parthenium argentatum	Eukaryota;Plants;Land Plants			PRJNA42261	0.152803	37.6079	chloroplast	NC_013553.1/GU120098.1	55	2009-12-15T00:00:00Z
Glycine dolichocarpa	Eukaryota;Plants;Land Plants			PRJNA210628	0.152804	35.3126	chloroplast	NC_021648.1/KC893636.1	82	2013-07-23T00:00:00Z
Lilium martagon var. pilosiusculum	Eukaryota;Plants;Land Plants			PRJNA487410	0.152816	37.002	chloroplast	NC_039162.1/MF964219.1	84	2018-08-24T00:00:00Z
Paeonia rockii	Eukaryota;Plants;Land Plants			PRJNA479277	0.152821	38.3167	chloroplast	NC_037772.1/MF488719.1	83	2018-07-05T00:00:00Z
Phoebe zhennan	Eukaryota;Plants;Land Plants			PRJNA415449	0.152831	39.1478	chloroplast	NC_036143.1/MF315089.1	81	2017-10-23T00:00:00Z
Lindera angustifolia	Eukaryota;Plants;Land Plants			PRJNA594684	0.152832	39.1822	chloroplast	NC_045253.1/MG581438.1	81	2019-12-12T00:00:00Z
Acorus gramineus	Eukaryota;Plants;Land Plants			PRJNA274078	0.152849	38.7016	plastid	NC_026299.1/KP099646.1	84	2015-02-13T00:00:00Z
Phoebe chekiangensis	Eukaryota;Plants;Land Plants		SAMN06118523	PRJNA389000	0.152849	39.1439	chloroplast	NC_034925.1/KY346511.1	81	2017-06-02T00:00:00Z
Phoebe bournei	Eukaryota;Plants;Land Plants			PRJNA389060	0.152853	39.1474	chloroplast	NC_034926.1/KY346512.1	81	2017-06-02T00:00:00Z
Cirsium arvense	Eukaryota;Plants;Land Plants			PRJNA435310	0.152855	37.7089	plastid	NC_036965.1/KY562583.1	88	2018-02-22T00:00:00Z
Phoebe omeiensis	Eukaryota;Plants;Land Plants			PRJNA344236	0.152855	39.1351	chloroplast	NC_031190.1/KX437772.1	81	2016-09-23T00:00:00Z
Brassica napus ZY036	Eukaryota;Plants;Land Plants			PRJNA293435	0.15286	36.3234	chloroplast	Pltd:NC_016734.1/	87	2012-04-11T00:00:00Z
Scrophularia henryi	Eukaryota;Plants;Land Plants		SAMN07599984	PRJNA435350	0.152868	37.9962	chloroplast	NC_036943.1/MF861203.1	87	2018-02-22T00:00:00Z
Aloe vera	Eukaryota;Plants;Land Plants			PRJNA399916	0.152875	37.6563	chloroplast	NC_035506.1/KX377524.1	85	2017-08-24T00:00:00Z
Phoebe sheareri	Eukaryota;Plants;Land Plants			PRJNA344269	0.152876	39.1363	chloroplast	NC_031191.1/KX437773.1	81	2016-09-23T00:00:00Z
Hydrocotyle sibthorpioides	Eukaryota;Plants;Land Plants			PRJNA399910	0.15288	37.5137	chloroplast	NC_035502.1/KT589392.1	85	2017-08-24T00:00:00Z
Aster indicus	Eukaryota;Plants;Land Plants			PRJNA509826	0.152885	37.2509	chloroplast	NC_040126.1/MG710386.1	85	2018-12-14T00:00:00Z
Lindera rubronervia	Eukaryota;Plants;Land Plants			PRJNA594678	0.152885	39.1438	chloroplast	NC_045265.1/MG581452.1	81	2019-12-12T00:00:00Z
Petroselinum crispum	Eukaryota;Plants;Land Plants			PRJNA279090	0.15289	37.7821	chloroplast	NC_015821.1/HM596073.1	84	2011-07-15T00:00:00Z
Lindera metcalfiana	Eukaryota;Plants;Land Plants			PRJNA594695	0.152893	39.1581	chloroplast	NC_045259.1/MG581445.1	80	2019-12-12T00:00:00Z
Solms-laubachia eurycarpa	Eukaryota;Plants;Land Plants			PRJNA383505	0.152895	36.0607	chloroplast	NC_034359.1/KX886348.1	79	2017-04-19T00:00:00Z
Papaver rhoeas	Eukaryota;Plants;Land Plants			PRJNA479204	0.152905	38.8411	chloroplast	NC_037831.1/MF943221.1	85	2018-07-05T00:00:00Z
Allium mairei	Eukaryota;Plants;Land Plants			PRJNA608413	0.152913	36.9432	chloroplast	NC_045913.1/MK820615.1	86	2020-02-24T00:00:00Z
Lindera erythrocarpa	Eukaryota;Plants;Land Plants			PRJNA594701	0.15292	39.1244	chloroplast	NC_045256.1/MG581441.1	81	2019-12-12T00:00:00Z
Castilleja paramensis	Eukaryota;Plants;Land Plants			PRJNA353410	0.152926	38.1904	plastid	NC_031805.1/KT959111.1	84	2016-11-14T00:00:00Z
Veronicastrum sibiricum	Eukaryota;Plants;Land Plants			PRJNA348061	0.15293	38.292	plastid	NC_031345.1/KT724053.1	86	2016-10-13T00:00:00Z
Allium fasciculatum	Eukaryota;Plants;Land Plants			PRJNA608340	0.152931	37.0651	chloroplast	NC_045845.1/MK251467.1	85	2020-02-24T00:00:00Z
Dasiphora fruticosa	Eukaryota;Plants;Land Plants			PRJNA421516	0.152931	37.2338	chloroplast	NC_036423.1/MF683841.1	84	2017-12-07T00:00:00Z
Papaver somniferum	Eukaryota;Plants;Land Plants			PRJNA492326	0.152931	38.8554	chloroplast	Pltd:NC_029434.1/	85	2016-03-01T00:00:00Z
Lilium leucanthum	Eukaryota;Plants;Land Plants			PRJNA399937	0.152935	36.9915	chloroplast	NC_035590.1/KY748299.1	85	2017-08-24T00:00:00Z
Polygonatum sibiricum	Eukaryota;Plants;Land Plants			PRJNA313702	0.15296	37.9452	chloroplast	NC_029485.1/KT695605.1	84	2016-03-01T00:00:00Z
Dioscorea polystachya	Eukaryota;Plants;Land Plants			PRJNA479255	0.152963	37.0429	chloroplast	NC_037716.1/KY996494.1	86	2018-07-05T00:00:00Z
Primulina eburnea	Eukaryota;Plants;Land Plants			PRJNA414867	0.152963	37.6287	chloroplast	NC_036100.1/MF177038.1	88	2017-10-18T00:00:00Z
Pongamia pinnata	Eukaryota;Plants;Land Plants			PRJNA82189	0.152968	34.8262	chloroplast	NC_016708.2/JN673818.2	83	2012-01-27T00:00:00Z
Cichorium intybus	Eukaryota;Plants;Land Plants			PRJNA553969	0.152975	37.6526	chloroplast	NC_043842.1/MK569377.1	82	2019-07-22T00:00:00Z
Primulina liboensis	Eukaryota;Plants;Land Plants			PRJNA414870	0.152989	37.6537	chloroplast	NC_036101.1/MF177039.1	88	2017-10-18T00:00:00Z
Aster tataricus	Eukaryota;Plants;Land Plants			PRJNA550681	0.152992	37.2569	chloroplast	NC_042913.1/MH669275.1	84	2019-06-25T00:00:00Z
Nyctaginia capitata	Eukaryota;Plants;Land Plants			PRJNA532157	0.152995	35.9783	chloroplast	NC_041415.1/MH286318.1	85	2019-04-10T00:00:00Z
Lindera reflexa	Eukaryota;Plants;Land Plants			PRJNA594693	0.153006	39.1521	chloroplast	NC_045264.1/MG581451.1	81	2019-12-12T00:00:00Z
Conyza bonariensis	Eukaryota;Plants;Land Plants			PRJNA407194	0.153014	37.1626	chloroplast	NC_035884.1/MF276802.1	87	2017-09-13T00:00:00Z
Swertia leducii	Eukaryota;Plants;Land Plants			PRJNA595284	0.153015	38.1695	chloroplast	NC_045301.1/MN609998.1	85	2019-12-12T00:00:00Z
Glycine falcata	Eukaryota;Plants;Land Plants			PRJNA210631	0.153023	35.3274	chloroplast	NC_021649.1/KC893637.1	82	2013-07-23T00:00:00Z
Euphrasia regelii	Eukaryota;Plants;Land Plants			PRJNA579654	0.153026	38.2412	chloroplast	NC_045041.1/MK070895.1	75	2019-10-29T00:00:00Z
Lindera sericea	Eukaryota;Plants;Land Plants			PRJNA594681	0.153028	39.1562	chloroplast	NC_045266.1/MG581453.1	81	2019-12-12T00:00:00Z
Dendrobium pendulum	Eukaryota;Plants;Land Plants			PRJNA316233	0.153038	37.4835	chloroplast	NC_029705.1/KT695604.1	76	2016-03-28T00:00:00Z
Camelina sativa	Eukaryota;Plants;Land Plants			PRJNA313565	0.153044	36.4804	chloroplast	NC_029337.1/LN877386.1	84	2016-01-06T00:00:00Z
Alseodaphne semecarpifolia	Eukaryota;Plants;Land Plants			PRJNA453305	0.153051	39.0648	chloroplast	NC_037491.1/MG407595.1	81	2018-04-24T00:00:00Z
Ludisia discolor	Eukaryota;Plants;Land Plants			PRJNA328714	0.153054	36.9693	chloroplast	NC_030540.1/KU578274.1	86	2016-07-12T00:00:00Z
Lilium taliense	Eukaryota;Plants;Land Plants			PRJNA383497	0.153055	36.9455	chloroplast	NC_034370.1/KY009938.1	83	2017-04-19T00:00:00Z
Petrocodon jingxiensis	Eukaryota;Plants;Land Plants			PRJNA563411	0.153056	37.4902	chloroplast	NC_044477.1/MK887172.1	86	2019-09-06T00:00:00Z
Dendrobium strongylanthum	Eukaryota;Plants;Land Plants			PRJNA291882	0.153059	37.6182	chloroplast	NC_027691.1/KR673323.1	77	2015-08-04T00:00:00Z
Sonneratia alba	Eukaryota;Plants;Land Plants			PRJNA508140	0.153061	37.2877	chloroplast	NC_039975.1/MH105772.1	85	2018-12-03T00:00:00Z
Alseodaphne huanglianshanensis	Eukaryota;Plants;Land Plants			PRJNA453322	0.15307	39.0749	chloroplast	NC_037490.1/MG407594.1	81	2018-04-24T00:00:00Z
Dioscorea bulbifera	Eukaryota;Plants;Land Plants			PRJNA504225	0.153075	37.0243	chloroplast	NC_039708.1/MG267383.1	86	2018-11-09T00:00:00Z
Salicornia bigelovii	Eukaryota;Plants;Land Plants			PRJNA287409	0.153076	36.295	chloroplast	NC_027226.1/KJ629117.1	83	2015-06-18T00:00:00Z
Iris missouriensis	Eukaryota;Plants;Land Plants			PRJNA550782	0.153084	37.9302	chloroplast	NC_042827.1/MH251636.1	86	2019-06-25T00:00:00Z
Alseodaphne gracilis	Eukaryota;Plants;Land Plants			PRJNA453270	0.153099	39.0538	chloroplast	NC_037489.1/MG407593.1	81	2018-04-24T00:00:00Z
Haberlea rhodopensis	Eukaryota;Plants;Land Plants			PRJNA353460	0.153099	37.754	chloroplast	NC_031852.1/KX657870.1	86	2016-11-14T00:00:00Z
Chrysosplenium aureobracteatum	Eukaryota;Plants;Land Plants			PRJNA504057	0.153102	37.345	chloroplast	NC_039740.1/MG878089.1	85	2018-11-09T00:00:00Z
Digitalis lanata	Eukaryota;Plants;Land Plants			PRJNA387975	0.153108	38.561	plastid	NC_034688.1/	85	2017-05-25T00:00:00Z
Allium cyathophorum var. farreri	Eukaryota;Plants;Land Plants			PRJNA608325	0.153111	36.8811	chloroplast	NC_045843.1/MK931245.1	86	2020-02-24T00:00:00Z
Carthamus tinctorius	Eukaryota;Plants;Land Plants			PRJNA339090	0.153114	37.7869	chloroplast	NC_030783.1/KM207677.1	84	2016-08-16T00:00:00Z
Cullen corylifolium	Eukaryota;Plants;Land Plants			PRJNA550928	0.153114	35.3325	chloroplast	NC_042700.1/MK069582.1	87	2019-06-25T00:00:00Z
Lilium henryi	Eukaryota;Plants;Land Plants			PRJNA400007	0.153119	36.9719	chloroplast	NC_035570.1/KY748302.1	83	2017-08-24T00:00:00Z
Paeonia suffruticosa	Eukaryota;Plants;Land Plants			PRJNA479227	0.153119	38.3793	chloroplast	NC_037879.1/MH191384.1	83	2018-07-05T00:00:00Z
Allium altaicum	Eukaryota;Plants;Land Plants			PRJNA524596	0.153129	36.8317	chloroplast	NC_040972.1/MH159130.1	85	2019-02-27T00:00:00Z
Dichocarpum fargesii	Eukaryota;Plants;Land Plants			PRJNA531968	0.153134	38.5283	chloroplast	NC_041478.1/MK569485.1	83	2019-04-10T00:00:00Z
Mazus pumilus	Eukaryota;Plants;Land Plants			PRJNA546310	0.153149	37.8063	chloroplast	NC_042444.1/MG642817.1	84	2019-06-06T00:00:00Z
Erythranthe lutea	Eukaryota;Plants;Land Plants			PRJNA322475	0.15315	37.7153	chloroplast	NC_030212.1/KU705476.1	84	2016-05-23T00:00:00Z
Dioscorea alata	Eukaryota;Plants;Land Plants			PRJNA504095	0.153161	37.0225	chloroplast	NC_039707.1/MG267382.1	86	2018-11-09T00:00:00Z
Allium fistulosum	Eukaryota;Plants;Land Plants			PRJNA514775	0.153164	36.8331	chloroplast	NC_040222.1/MH926357.1	86	2019-01-11T00:00:00Z
Phryma leptostachya subsp. asiatica	Eukaryota;Plants;Land Plants			PRJNA550759	0.153167	37.7294	chloroplast	NC_042727.1/MK381317.1	84	2019-06-25T00:00:00Z
Allium sativum	Eukaryota;Plants;Land Plants			PRJNA353416	0.153172	36.6771	chloroplast	NC_031829.1/KX683282.1	83	2016-11-14T00:00:00Z
Aloe maculata	Eukaryota;Plants;Land Plants			PRJNA399887	0.153175	37.6217	chloroplast	NC_035505.1/KX377523.1	85	2017-08-24T00:00:00Z
Orychophragmus hupehensis	Eukaryota;Plants;Land Plants			PRJNA368905	0.153184	36.3517	chloroplast	NC_033500.1/KX756551.1	85	2017-01-26T00:00:00Z
Allium spicatum	Eukaryota;Plants;Land Plants			PRJNA608412	0.153187	36.8752	chloroplast	NC_045911.1/MK931246.1	86	2020-02-24T00:00:00Z
Dendrobium huoshanense	Eukaryota;Plants;Land Plants			PRJNA302504	0.153188	37.4879	chloroplast	NC_028430.1/KT630834.1	76	2015-11-17T00:00:00Z
Halenia corniculata	Eukaryota;Plants;Land Plants			PRJNA550827	0.153198	38.2263	chloroplast	NC_042674.1/MK606372.1	84	2019-06-25T00:00:00Z
Atractylodes lancea	Eukaryota;Plants;Land Plants			PRJNA453362	0.153201	37.6988	chloroplast	NC_037483.1/MG874804.1	88	2018-04-24T00:00:00Z
Silybum marianum	Eukaryota;Plants;Land Plants			PRJNA298170	0.153202	37.7378	chloroplast	NC_028027.1/KT267161.1	87	2015-10-08T00:00:00Z
Hydrocotyle verticillata	Eukaryota;Plants;Land Plants			PRJNA279087	0.153207	37.5942	chloroplast	NC_015818.1/HM596070.1	85	2011-07-15T00:00:00Z
Streptocarpus teitensis	Eukaryota;Plants;Land Plants			PRJNA439047	0.153207	37.5871	chloroplast	NC_037184.1/MF596485.1	87	2018-03-23T00:00:00Z
Nothoceros aenigmaticus	Eukaryota;Plants;Land Plants			PRJNA37855	0.153208	35.0164	plastid	NC_020259.1/KC285889.1	0	2013-02-22T00:00:00Z
Allium praemixtum	Eukaryota;Plants;Land Plants			PRJNA563418	0.153226	36.8084	chloroplast	NC_044412.1/MK411817.1	86	2019-09-06T00:00:00Z
Utricularia macrorhiza	Eukaryota;Plants;Land Plants			PRJNA267394	0.153228	37.0396	chloroplast	NC_025653.1/HG803177.1	77	2014-11-03T00:00:00Z
Salicornia europaea	Eukaryota;Plants;Land Plants			PRJNA287368	0.153232	36.2353	chloroplast	NC_027225.1/KJ629116.1	84	2015-06-18T00:00:00Z
Lilium fargesii	Eukaryota;Plants;Land Plants			PRJNA376904	0.153235	36.9113	chloroplast	NC_033908.1/KX592156.1	85	2017-02-27T00:00:00Z
Baccharis genistelloides	Eukaryota;Plants;Land Plants		SAMN04076333	PRJNA389084	0.153239	37.1668	chloroplast	NC_034852.1/KX063864.1	84	2017-06-02T00:00:00Z
Goodyera procera	Eukaryota;Plants;Land Plants			PRJNA313572	0.15324	37.6357	chloroplast	NC_029363.1/KT886429.1	80	2016-03-01T00:00:00Z
Primulina linearifolia	Eukaryota;Plants;Land Plants			PRJNA421512	0.153244	37.6295	chloroplast	NC_036414.1/MF472013.1	87	2017-12-07T00:00:00Z
Chimonanthus nitens	Eukaryota;Plants;Land Plants			PRJNA550849	0.15325	39.2692	chloroplast	NC_042745.1/MH377058.1	83	2019-06-25T00:00:00Z
Chimonanthus praecox	Eukaryota;Plants;Land Plants			PRJNA550839	0.153252	39.2484	chloroplast	NC_042744.1/MH377057.1	83	2019-06-25T00:00:00Z
Orychophragmus taibaiensis	Eukaryota;Plants;Land Plants			PRJNA368904	0.153255	36.3388	chloroplast	NC_033499.1/KX756550.1	85	2017-01-26T00:00:00Z
Atractylodes macrocephala	Eukaryota;Plants;Land Plants			PRJNA573235	0.153256	37.7042	chloroplast	NC_044671.1/MN117071.1	88	2019-09-21T00:00:00Z
Atractylodes chinensis	Eukaryota;Plants;Land Plants			PRJNA453334	0.153258	37.7031	chloroplast	NC_037484.1/MG874805.1	88	2018-04-24T00:00:00Z
Tecomaria capensis	Eukaryota;Plants;Land Plants			PRJNA453304	0.153263	38.1436	chloroplast	NC_037462.1/MG831880.1	84	2018-04-24T00:00:00Z
Eutrema botschantzevii	Eukaryota;Plants;Land Plants			PRJNA313588	0.153279	36.3474	chloroplast	NC_029379.1/KT962847.1	87	2016-03-01T00:00:00Z
Passiflora lutea	Eukaryota;Plants;Land Plants			PRJNA553911	0.153282	37.2797	chloroplast	NC_043815.1/MK694922.1	95	2019-07-22T00:00:00Z
Draba nemorosa JO21	Eukaryota;Plants;Land Plants			PRJNA19219	0.153289	36.4716	chloroplast	NC_009272.1/AP009373.1	84	2007-04-03T00:00:00Z
Acorus tatarinowii	Eukaryota;Plants;Land Plants			PRJNA595201	0.153296	38.6964	chloroplast	NC_045294.1/MN536753.1	84	2019-12-12T00:00:00Z
Eutrema halophilum	Eukaryota;Plants;Land Plants			PRJNA313556	0.153311	36.3405	chloroplast	NC_029378.1/KT962846.1	87	2016-03-01T00:00:00Z
Salpinga maranonensis	Eukaryota;Plants;Land Plants			PRJNA353463	0.153311	37.4161	chloroplast	NC_031888.1/KX826832.1	83	2016-12-05T00:00:00Z
Salicornia brachiata	Eukaryota;Plants;Land Plants			PRJNA287370	0.153324	36.2155	chloroplast	NC_027224.1/KJ629115.1	84	2015-06-18T00:00:00Z
Sesamum indicum	Eukaryota;Plants;Land Plants			PRJNA268358	0.153324	38.2034	chloroplast	Pltd:NC_016433.2/	87	2011-12-06T00:00:00Z
Calycanthus floridus var. glaucus	Eukaryota;Plants;Land Plants			PRJNA12241	0.153337	39.2684	chloroplast	NC_004993.1/AJ428413.1	86	2003-07-09T00:00:00Z
Dioscorea aspersa	Eukaryota;Plants;Land Plants			PRJNA504218	0.153337	37.0419	chloroplast	NC_039807.1/MG267381.1	86	2018-11-09T00:00:00Z
Pisonia aculeata	Eukaryota;Plants;Land Plants			PRJNA529149	0.153342	36.341	plastid	NC_041272.1/MK397886.1	82	2019-03-26T00:00:00Z
Anethum graveolens	Eukaryota;Plants;Land Plants			PRJNA313536	0.153356	37.6523	chloroplast	NC_029470.1/KR011055.1	84	2016-03-01T00:00:00Z
Brassica oleracea	Eukaryota;Plants;Land Plants			PRJNA527530	0.153364	36.3606	chloroplast	NC_041167.1/MG717287.1	87	2019-03-18T00:00:00Z
Raphanus sativus	Eukaryota;Plants;Land Plants			PRJNA344915	0.153368	36.3394	chloroplast	Pltd:NC_024469.1/	87	2014-07-09T00:00:00Z
Cakile arabica	Eukaryota;Plants;Land Plants			PRJNA339069	0.153378	36.412	chloroplast	NC_030775.1/KX343072.1	85	2016-08-16T00:00:00Z
Gynochthodes officinalis	Eukaryota;Plants;Land Plants			PRJNA298197	0.153398	38.0533	chloroplast	NC_028009.1/KR869730.1	91	2015-10-08T00:00:00Z
Primulina huaijiensis	Eukaryota;Plants;Land Plants			PRJNA421541	0.153401	37.5852	chloroplast	NC_036413.1/MF472012.1	87	2017-12-07T00:00:00Z
Eutrema salsugineum	Eukaryota;Plants;Land Plants			PRJNA300769	0.153407	36.336	chloroplast	NC_028170.1/KR584659.1	87	2015-11-01T00:00:00Z
Swertia mussotii	Eukaryota;Plants;Land Plants			PRJNA344081	0.153431	38.1592	chloroplast	NC_031155.1/KU641021.1	84	2016-09-23T00:00:00Z
Iris gatesii	Eukaryota;Plants;Land Plants			PRJNA261912	0.153441	37.8862	plastid	NC_024936.1/KM014691.1	86	2014-10-16T00:00:00Z
Pentagramma triangularis	Eukaryota;Plants;Land Plants			PRJNA511683	0.153445	41.8411	chloroplast	NC_040171.1/MH173070.1	87	2018-12-24T00:00:00Z
Lavandula angustifolia	Eukaryota;Plants;Land Plants			PRJNA313542	0.153448	38.0389	chloroplast	NC_029370.1/KT948988.1	88	2016-03-01T00:00:00Z
Calandrinia granulifera	Eukaryota;Plants;Land Plants			PRJNA528072	0.153454	36.6546	plastid	NC_041260.1/MK397860.1	82	2019-03-26T00:00:00Z
Allium trifurcatum	Eukaryota;Plants;Land Plants			PRJNA608358	0.153456	36.9494	chloroplast	NC_045844.1/MK931247.1	85	2020-02-24T00:00:00Z
Celosia cristata	Eukaryota;Plants;Land Plants			PRJNA608372	0.153472	36.7318	chloroplast	NC_045887.1/MK470118.1	73	2020-02-24T00:00:00Z
Brassica rapa	Eukaryota;Plants;Land Plants			PRJNA249065	0.153482	36.3606	chloroplast	Pltd:NC_015139.1/	0	2011-02-16T00:00:00Z
Brassica juncea	Eukaryota;Plants;Land Plants			PRJNA301284	0.153483	36.3597	chloroplast	NC_028272.1/KT581449.1	85	2015-11-05T00:00:00Z
Brassica rapa	Eukaryota;Plants;Land Plants			PRJNA522222	0.153483	36.3591	chloroplast	NC_040849.1/MG717286.1	87	2019-02-13T00:00:00Z
Dorcoceras hygrometricum	Eukaryota;Plants;Land Plants			PRJNA80211	0.153493	37.5945	chloroplast	NC_016468.1/JN107811.1	85	2011-12-20T00:00:00Z
Trichopus zeylanicus subsp. travancoricus	Eukaryota;Plants;Land Plants			PRJNA557936	0.153497	37.262	chloroplast	NC_044084.1/MK674169.1	85	2019-08-01T00:00:00Z
Draba oreades	Eukaryota;Plants;Land Plants			PRJNA479092	0.153503	36.4807	chloroplast	NC_037760.1/KY947352.1	84	2018-07-05T00:00:00Z
Polygonatum cyrtonema	Eukaryota;Plants;Land Plants			PRJNA302533	0.153503	37.183	chloroplast	NC_028429.1/KT630835.1	83	2015-11-17T00:00:00Z
Allium przewalskianum	Eukaryota;Plants;Land Plants			PRJNA609499	0.153509	36.8519	chloroplast	NC_046059.1/MN519210.1	69	2020-03-07T00:00:00Z
Prangos trifida	Eukaryota;Plants;Land Plants			PRJNA479039	0.15351	37.7526	chloroplast	NC_037852.1/MG386251.1	84	2018-07-05T00:00:00Z
Torenia benthamiana	Eukaryota;Plants;Land Plants			PRJNA595195	0.153526	37.6275	chloroplast	NC_045273.1/MK789686.1	87	2019-12-12T00:00:00Z
Montia fontana	Eukaryota;Plants;Land Plants			PRJNA529168	0.15353	36.9791	plastid	NC_041269.1/MK397877.1	85	2019-03-26T00:00:00Z
Allium cepa	Eukaryota;Plants;Land Plants			PRJNA261041	0.153538	36.8085	chloroplast	NC_024813.1/KF728080.1	83	2014-10-07T00:00:00Z
Marshallia ramosa	Eukaryota;Plants;Land Plants			PRJNA548738	0.153551	37.2423	chloroplast	NC_042609.1/MH037172.1	85	2019-06-13T00:00:00Z
Allium kingdonii	Eukaryota;Plants;Land Plants			PRJNA609519	0.153559	36.9291	chloroplast	NC_046030.1/MK294559.1	85	2020-03-07T00:00:00Z
Megadenia pygmaea	Eukaryota;Plants;Land Plants			PRJNA383502	0.153569	36.3348	chloroplast	NC_034357.1/KX371593.1	87	2017-04-19T00:00:00Z
Allium oschaninii	Eukaryota;Plants;Land Plants			PRJNA563430	0.15358	36.8049	chloroplast	NC_044470.1/MK411816.1	86	2019-09-06T00:00:00Z
Parnassia trinervis	Eukaryota;Plants;Land Plants			PRJNA555904	0.15359	36.9686	chloroplast	NC_043951.1/MH544205.1	87	2019-07-22T00:00:00Z
Sinapis arvensis	Eukaryota;Plants;Land Plants			PRJNA353432	0.15359	36.3103	chloroplast	NC_035303.1/KU050690.1	87	2017-07-15T00:00:00Z
Angiopteris angustifolia	Eukaryota;Plants;Land Plants			PRJNA274082	0.153596	35.4599	plastid	NC_026300.1/KP099647.1	88	2015-02-04T00:00:00Z
Calycanthus chinensis	Eukaryota;Plants;Land Plants			PRJNA453212	0.153596	39.2719	chloroplast	NC_037504.1/MG561304.1	84	2018-04-24T00:00:00Z
Allium herderianum CMS-S	Eukaryota;Plants;Land Plants			PRJNA541652	0.153605	36.7599	chloroplast	NC_042156.1/MH992110.1	86	2019-05-12T00:00:00Z
Allium maowenense CMS-S	Eukaryota;Plants;Land Plants			PRJNA541615	0.153608	36.793	chloroplast	NC_042157.1/MH992111.1	86	2019-05-12T00:00:00Z
Allium chrysanthum CMS-S	Eukaryota;Plants;Land Plants			PRJNA541616	0.153621	36.7547	chloroplast	NC_042154.1/MH992108.1	86	2019-05-12T00:00:00Z
Wightia speciosissima	Eukaryota;Plants;Land Plants			PRJNA550825	0.153621	37.6661	chloroplast	NC_042955.1/MK381318.1	87	2019-06-25T00:00:00Z
Rehmannia glutinosa	Eukaryota;Plants;Land Plants			PRJNA383203	0.153622	37.9522	chloroplast	NC_034308.1/KX636157.1	88	2017-04-17T00:00:00Z
Foeniculum vulgare	Eukaryota;Plants;Land Plants			PRJNA313727	0.153628	37.6487	chloroplast	NC_029469.1/KR011054.1	85	2016-03-01T00:00:00Z
Calanthe davidii	Eukaryota;Plants;Land Plants			PRJNA453217	0.153629	36.9481	chloroplast	NC_037438.1/MG925365.1	88	2018-04-24T00:00:00Z
Scrophularia buergeriana	Eukaryota;Plants;Land Plants			PRJNA348032	0.153631	37.9891	chloroplast	NC_031437.1/KP718626.1	87	2016-10-13T00:00:00Z
Brassica nigra	Eukaryota;Plants;Land Plants			PRJNA311781	0.153633	36.3861	chloroplast	NC_030450.1/KT878383.1	87	2016-07-04T00:00:00Z
Lomariopsis japurensis	Eukaryota;Plants;Land Plants			PRJNA573229	0.153641	41.3099	chloroplast	NC_044682.1/MK705752.1	89	2019-09-21T00:00:00Z
Dendrobium nobile	Eukaryota;Plants;Land Plants			PRJNA313669	0.15366	37.4977	chloroplast	NC_029456.1/KT591465.1	77	2016-03-01T00:00:00Z
Lancea tibetica	Eukaryota;Plants;Land Plants			PRJNA479060	0.153665	37.8909	chloroplast	NC_037693.1/MF593117.1	85	2018-07-05T00:00:00Z
Allium xichuanense CMS-S	Eukaryota;Plants;Land Plants			PRJNA541613	0.153673	36.7332	chloroplast	NC_042159.1/MH992113.1	86	2019-05-12T00:00:00Z
Arabis flagellosa Kifune	Eukaryota;Plants;Land Plants			PRJNA453325	0.153673	36.4007	chloroplast	NC_037475.1/LC361351.1	86	2018-04-24T00:00:00Z
Celosia argentea	Eukaryota;Plants;Land Plants			PRJNA529146	0.153673	36.7319	plastid	NC_041294.1/MK397861.1	85	2019-03-26T00:00:00Z
Galium mollugo	Eukaryota;Plants;Land Plants			PRJNA435325	0.153677	37.178	plastid	NC_036970.1/KY562588.1	85	2018-02-22T00:00:00Z
Arabis hirsuta JO23	Eukaryota;Plants;Land Plants			PRJNA19215	0.153689	36.3962	chloroplast	NC_009268.1/AP009369.1	84	2007-04-03T00:00:00Z
Allium rude CMS-S	Eukaryota;Plants;Land Plants			PRJNA541614	0.153697	36.7476	chloroplast	NC_042158.1/MH992112.1	86	2019-05-12T00:00:00Z
Veratrum patulum	Eukaryota;Plants;Land Plants			PRJNA226184	0.153699	37.7107	chloroplast	NC_022715.2/KF437397.2	83	2013-11-05T00:00:00Z
Allium chrysocephalum CMS-S	Eukaryota;Plants;Land Plants			PRJNA541604	0.15371	36.7361	chloroplast	NC_042155.1/MH992109.1	86	2019-05-12T00:00:00Z
Woodwardia unigemmata	Eukaryota;Plants;Land Plants			PRJNA304870	0.153717	43.2138	chloroplast	NC_028543.1/KT599101.1	88	2015-12-03T00:00:00Z
Biscutella lyrata	Eukaryota;Plants;Land Plants			PRJNA508172	0.15372	36.3707	chloroplast	NC_039953.1/MH359179.1	87	2018-12-03T00:00:00Z
Mesembryanthemum cordifolium	Eukaryota;Plants;Land Plants			PRJNA529164	0.153722	37.0786	plastid	NC_041280.1/MK397873.1	85	2019-03-26T00:00:00Z
Bunias erucago	Eukaryota;Plants;Land Plants			PRJNA414842	0.153742	36.2315	chloroplast	NC_036110.1/LN877377.1	85	2017-10-02T00:00:00Z
Sinalliaria limprichtiana	Eukaryota;Plants;Land Plants			PRJNA383165	0.153746	36.0452	chloroplast	NC_034287.1/KX342848.1	71	2017-04-17T00:00:00Z
Humulus lupulus	Eukaryota;Plants;Land Plants			PRJNA298189	0.153751	36.7946	chloroplast	NC_028032.1/KT266264.1	83	2015-10-08T00:00:00Z
Primula kwangtungensis	Eukaryota;Plants;Land Plants			PRJNA383513	0.153757	37.0734	chloroplast	NC_034371.1/KX774737.1	85	2017-04-19T00:00:00Z
Ricotia isatoides	Eukaryota;Plants;Land Plants			PRJNA508117	0.153759	36.1735	chloroplast	NC_039960.1/MH359186.1	83	2018-12-03T00:00:00Z
Sinapis alba	Eukaryota;Plants;Land Plants			PRJNA608311	0.15376	36.3079	chloroplast	NC_045948.1/MN176144.1	83	2020-02-24T00:00:00Z
Heldreichia bupleurifolia	Eukaryota;Plants;Land Plants			PRJNA508145	0.153763	36.2714	chloroplast	NC_039954.1/MH359180.1	87	2018-12-03T00:00:00Z
Meconopsis racemosa	Eukaryota;Plants;Land Plants			PRJNA496090	0.153763	38.7538	chloroplast	NC_039625.1/MH394399.1	84	2018-11-06T00:00:00Z
Rehmannia elata	Eukaryota;Plants;Land Plants			PRJNA383187	0.153772	37.9705	chloroplast	NC_034312.1/KX636161.1	87	2017-04-17T00:00:00Z
Patrinia saniculifolia	Eukaryota;Plants;Land Plants			PRJNA433140	0.153775	38.4783	chloroplast	NC_036835.1/MG517444.1	83	2018-02-06T00:00:00Z
Humulus scandens	Eukaryota;Plants;Land Plants			PRJNA504192	0.153776	36.879	chloroplast	NC_039730.1/MH118122.1	85	2018-11-09T00:00:00Z
Tanaecium tetragonolobum	Eukaryota;Plants;Land Plants			PRJNA298000	0.153776	38.2595	chloroplast	NC_027955.1/KR534325.1	79	2015-10-07T00:00:00Z
Metanarthecium luteoviride	Eukaryota;Plants;Land Plants			PRJNA311833	0.153777	37.3769	chloroplast	NC_029214.1/KT895904.1	84	2016-02-12T00:00:00Z
Orychophragmus diffusus	Eukaryota;Plants;Land Plants			PRJNA368906	0.153777	36.2889	chloroplast	NC_033498.1/KX756548.1	85	2017-01-26T00:00:00Z
Allium pskemense	Eukaryota;Plants;Land Plants			PRJNA563370	0.153788	36.748	chloroplast	NC_044411.1/MK411815.1	86	2019-09-06T00:00:00Z
Chuniophoenix nana	Eukaryota;Plants;Land Plants			PRJNA319111	0.153806	37.4803	plastid	NC_029966.1/KT312934.1	86	2016-04-20T00:00:00Z
Acorus americanus	Eukaryota;Plants;Land Plants			PRJNA27981	0.153819	38.5934	chloroplast	NC_010093.1/EU273602.1	84	2007-12-04T00:00:00Z
Acorus calamus	Eukaryota;Plants;Land Plants			PRJNA15689	0.153821	38.5988	plastid	NC_007407.1/AJ879453.1	84	2005-09-09T00:00:00Z
Mucuna macrocarpa	Eukaryota;Plants;Land Plants			PRJNA557994	0.153826	35.0831	chloroplast	NC_044116.1/MG867571.2	82	2019-08-02T00:00:00Z
Mesembryanthemum crystallinum	Eukaryota;Plants;Land Plants			PRJNA309773	0.153831	37.027	chloroplast	NC_029049.1/KM016695.1	90	2016-01-26T00:00:00Z
Cajanus cajan	Eukaryota;Plants;Land Plants			PRJNA376605	0.153841	34.9348	chloroplast	Pltd:NC_031429.1/	80	2016-10-13T00:00:00Z
Torenia concolor	Eukaryota;Plants;Land Plants			PRJNA595245	0.153853	37.5846	chloroplast	NC_045272.1/MK789685.1	87	2019-12-12T00:00:00Z
Cannabis sativa	Eukaryota;Plants;Land Plants			PRJNA315284	0.153854	36.6685	chloroplast	NC_027223.1/KR363961.1	86	2015-06-18T00:00:00Z
Lysionotus pauciflorus	Eukaryota;Plants;Land Plants			PRJNA387760	0.153856	37.5032	chloroplast	NC_034660.1/KX752081.1	88	2017-05-24T00:00:00Z
Dioscorea collettii	Eukaryota;Plants;Land Plants			PRJNA479199	0.15387	37.169	chloroplast	NC_037717.1/KY996495.1	87	2018-07-05T00:00:00Z
Cannabis sativa	Eukaryota;Plants;Land Plants			PRJNA315284	0.153871	36.6703	chloroplast	KP274871.1	86	2015-02-16T00:00:00Z
Eutrema heterophyllum	Eukaryota;Plants;Land Plants			PRJNA306317	0.153876	36.3793	chloroplast	NC_028728.1/KT270358.1	87	2015-12-17T00:00:00Z
Cardamine oligosperma	Eukaryota;Plants;Land Plants			PRJNA435312	0.153888	36.4083	plastid	NC_036963.1/KY562581.1	86	2018-02-22T00:00:00Z
Rehmannia henryi	Eukaryota;Plants;Land Plants			PRJNA383229	0.15389	37.9466	chloroplast	NC_034309.1/KX636158.1	87	2017-04-17T00:00:00Z
Neotorularia korolkowii	Eukaryota;Plants;Land Plants			PRJNA383509	0.153892	36.3359	chloroplast	NC_034361.1/KX886350.1	83	2017-04-19T00:00:00Z
Thlaspi arvense	Eukaryota;Plants;Land Plants			PRJNA383495	0.153892	36.1455	chloroplast	NC_034362.1/KX886351.1	87	2017-04-19T00:00:00Z
Matthiola incana	Eukaryota;Plants;Land Plants			PRJNA383504	0.153896	36.0809	chloroplast	NC_034358.1/KX886347.1	83	2017-04-19T00:00:00Z
Angiopteris evecta	Eukaryota;Plants;Land Plants			PRJNA18749	0.153901	35.4806	chloroplast	NC_008829.1/DQ821119.1	88	2007-01-31T00:00:00Z
Hesperis matronalis	Eukaryota;Plants;Land Plants			PRJNA399927	0.153907	36.4161	chloroplast	NC_035511.1/KY912026.1	86	2017-08-24T00:00:00Z
Plumeria rubra	Eukaryota;Plants;Land Plants			PRJNA609464	0.153912	37.9386	chloroplast	NC_046018.1/MN812495.1	85	2020-03-07T00:00:00Z
Cecropia pachystachya	Eukaryota;Plants;Land Plants			PRJNA504148	0.153925	36.5451	chloroplast	NC_039763.1/MF953831.1	84	2018-11-09T00:00:00Z
Rehmannia piasezkii	Eukaryota;Plants;Land Plants			PRJNA383230	0.153925	37.936	chloroplast	NC_034311.1/KX636160.1	87	2017-04-17T00:00:00Z
Ammopiptanthus mongolicus	Eukaryota;Plants;Land Plants			PRJNA504159	0.153935	36.8669	chloroplast	KY034453.1	85	2017-05-01T00:00:00Z
Dioscorea futschauensis	Eukaryota;Plants;Land Plants			PRJNA504224	0.153946	37.2085	chloroplast	NC_039808.1/MG267384.1	86	2018-11-09T00:00:00Z
Eutrema yunnanense	Eukaryota;Plants;Land Plants			PRJNA306316	0.153948	36.4071	chloroplast	NC_028727.1/KT270357.1	87	2015-12-17T00:00:00Z
Habenaria pantlingiana	Eukaryota;Plants;Land Plants			PRJNA280327	0.153951	36.5948	chloroplast	NC_026775.1/KJ524104.1	87	2015-04-22T00:00:00Z
Dendrobium chrysotoxum	Eukaryota;Plants;Land Plants			PRJNA304857	0.153953	37.6037	chloroplast	NC_028549.1/KT633996.1	63	2015-12-03T00:00:00Z
Tectona grandis	Eukaryota;Plants;Land Plants			PRJNA185995	0.153953	37.8927	chloroplast	NC_020098.1/HF567869.1	86	2013-01-02T00:00:00Z
Sinalliaria limprichtiana	Eukaryota;Plants;Land Plants			PRJNA383164	0.153964	36.0058	chloroplast	NC_034286.1/KX342847.1	84	2017-04-17T00:00:00Z
Dioscorea zingiberensis	Eukaryota;Plants;Land Plants			PRJNA284078	0.15397	37.2189	chloroplast	NC_027090.1/KP899622.1	86	2015-05-14T00:00:00Z
Echites umbellatus	Eukaryota;Plants;Land Plants			PRJNA267428	0.15397	38.0191	plastid	NC_025655.1/KJ953904.1	85	2014-11-24T00:00:00Z
Dioscorea villosa	Eukaryota;Plants;Land Plants			PRJNA387971	0.153974	37.1667	plastid	NC_034686.1/	84	2017-05-25T00:00:00Z
Psammosilene tunicoides	Eukaryota;Plants;Land Plants			PRJNA608305	0.153978	36.4935	plastid	NC_045947.1/MN136196.1	84	2020-02-24T00:00:00Z
Schrenkiella parvula	Eukaryota;Plants;Land Plants			PRJNA306303	0.153979	36.3615	chloroplast	NC_028726.1/KT222186.1	87	2015-12-17T00:00:00Z
Rehmannia solanifolia	Eukaryota;Plants;Land Plants			PRJNA383173	0.153989	37.9417	chloroplast	NC_034310.1/KX636159.1	88	2017-04-17T00:00:00Z
Bauhinia binata	Eukaryota;Plants;Land Plants			PRJNA479272	0.15399	36.603	chloroplast	NC_037764.1/MF135597.1	82	2018-07-05T00:00:00Z
Salvia japonica	Eukaryota;Plants;Land Plants			PRJNA394362	0.153995	38.0045	chloroplast	NC_035233.1/KY646163.1	87	2017-07-14T00:00:00Z
Ionopsidium acaule	Eukaryota;Plants;Land Plants			PRJNA313665	0.154	36.2734	chloroplast	NC_029333.1/LN866848.1	83	2016-01-06T00:00:00Z
Sisymbrium irio J04	Eukaryota;Plants;Land Plants			PRJNA479191	0.154001	36.3166	chloroplast	NC_037838.1/LC375846.1	87	2018-07-11T00:00:00Z
Acleisanthes obtusa	Eukaryota;Plants;Land Plants			PRJNA532023	0.154004	36.0075	chloroplast	NC_041416.1/MH286321.1	86	2019-04-10T00:00:00Z
Bunias orientalis	Eukaryota;Plants;Land Plants			PRJNA414815	0.154012	36.1433	chloroplast	NC_036111.1/LN877378.1	85	2017-10-02T00:00:00Z
Eremospatha macrocarpa	Eukaryota;Plants;Land Plants			PRJNA319110	0.154031	37.7015	plastid	NC_029964.1/KT312932.1	86	2016-04-20T00:00:00Z
Allium nanodes	Eukaryota;Plants;Land Plants			PRJNA600899	0.154032	37.0176	chloroplast	NC_045520.1/MH341456.1	85	2020-01-13T00:00:00Z
Pecluma dulcis	Eukaryota;Plants;Land Plants			PRJNA573240	0.154035	40.6927	chloroplast	NC_044685.1/MK705755.1	88	2019-09-21T00:00:00Z
Lancea hirsuta	Eukaryota;Plants;Land Plants			PRJNA453250	0.154045	37.8487	chloroplast	NC_037506.1/MG551489.1	83	2018-04-24T00:00:00Z
Pentalinon luteum	Eukaryota;Plants;Land Plants			PRJNA267433	0.154053	38.3056	plastid	NC_025658.1/KJ953909.1	84	2014-12-03T00:00:00Z
Lysiphyllum hookeri	Eukaryota;Plants;Land Plants			PRJNA479028	0.154055	36.6006	chloroplast	NC_037768.1/MF135601.1	82	2018-07-05T00:00:00Z
Rehmannia chingii	Eukaryota;Plants;Land Plants			PRJNA368879	0.154055	37.9709	chloroplast	NC_033534.1/KX426347.1	87	2017-01-26T00:00:00Z
Allium tuberosum	Eukaryota;Plants;Land Plants			PRJNA573215	0.154056	36.8827	chloroplast	NC_044709.1/MK335929.1	89	2019-09-21T00:00:00Z
Allium victorialis	Eukaryota;Plants;Land Plants			PRJNA439080	0.154074	37.016	chloroplast	NC_037240.1/MF687749.1	85	2018-03-23T00:00:00Z
Gynochthodes nanlingensis	Eukaryota;Plants;Land Plants			PRJNA304895	0.154086	38.5246	chloroplast	NC_028614.1/KT852576.1	90	2015-12-03T00:00:00Z
Aloidendron pillansii	Eukaryota;Plants;Land Plants			PRJNA573395	0.154094	37.5615	chloroplast	NC_044761.1/MN276325.1	84	2019-09-21T00:00:00Z
Ceratopteris cornuta	Eukaryota;Plants;Land Plants			PRJNA514774	0.154106	41.6681	chloroplast	NC_040212.1/MH173082.1	87	2019-01-11T00:00:00Z
Dactylorhiza majalis	Eukaryota;Plants;Land Plants			PRJNA573131	0.154108	36.9903	chloroplast	NC_044644.1/MK984209.1	87	2019-09-21T00:00:00Z
Sophora alopecuroides	Eukaryota;Plants;Land Plants			PRJNA414794	0.154108	36.575	chloroplast	NC_036102.1/MF156140.1	81	2017-10-18T00:00:00Z
Biscutella baetica	Eukaryota;Plants;Land Plants			PRJNA508173	0.154138	36.4018	chloroplast	NC_039952.1/MH359178.1	87	2018-12-03T00:00:00Z
Ammopiptanthus nanus	Eukaryota;Plants;Land Plants			PRJNA387804	0.15414	36.836	chloroplast	NC_034743.1/KY034454.1	85	2017-05-24T00:00:00Z
Lupinus albus	Eukaryota;Plants;Land Plants			PRJNA278595	0.15414	36.5499	chloroplast	NC_026681.1/KJ468099.1	83	2015-03-20T00:00:00Z
Sophora alopecuroides var. alopecuroides	Eukaryota;Plants;Land Plants			PRJNA579629	0.154149	36.5692	chloroplast	NC_045070.1/MG784458.1	84	2019-10-29T00:00:00Z
Dendrobium chrysocrepis	Eukaryota;Plants;Land Plants			PRJNA608334	0.154155	37.5226	chloroplast	NC_045945.1/MN915015.1	84	2020-02-24T00:00:00Z
Aethionema cordifolium	Eukaryota;Plants;Land Plants			PRJNA19223	0.154168	36.6191	chloroplast	NC_009265.1/AP009366.1	84	2007-04-03T00:00:00Z
Allium cyathophorum CMS-S	Eukaryota;Plants;Land Plants			PRJNA608414	0.154174	36.7727	chloroplast	NC_045912.1/MK820611.1	86	2020-02-24T00:00:00Z
Huperzia serrata	Eukaryota;Plants;Land Plants			PRJNA377021	0.154176	36.2754	chloroplast	NC_033874.1/KX426071.1	87	2017-02-27T00:00:00Z
Morettia canescens	Eukaryota;Plants;Land Plants			PRJNA399912	0.154184	36.4422	chloroplast	NC_035514.1/KY912031.1	86	2017-08-24T00:00:00Z
Ricotia cretica	Eukaryota;Plants;Land Plants			PRJNA508190	0.154188	36.3011	chloroplast	NC_039958.1/MH359184.1	85	2018-12-03T00:00:00Z
[truncated: 2,284 more rows]

## Sheet: Table S2
Table S2. List of genes identified in the chloroplast genomes of Cypripedium.
Category of genes	Group of genes	Name of genes
Self-replication	Ribosomal RNA genes	rrn4.5, rrn5, rrn16, rrn23
	Transfer RNA genes	trnC-GCA, trnD-GUC, trnE-UUC, trnF-GAA, trnG-UCCa, trnG-GCC, trnK-UUUa, trnL-UAAa, trnL-UAG, trnM-CAU, trnP-UGG, trnQ-UUG, trnR-UCU, trnS-GCU, trnS-GGA, trnS-UGA, trnT-UGU, trnT-GGU, trnV-UACa, trnY-GUA, trnW-CCA, trnfM-CAU, trnA-UGCa , trnH-GUG, trnI-CAU, trnI-GAUa, trnL-CAA, trnN-GUU, trnR-ACG, trnV-GAC
	Ribosomal protein(small subunit)	rps2, rps3, rps4, rps7, rps8, rps11, rps12b, rps14, rps15, rps16a, rps18, rps19
	Ribosomal protein(large subunit)	rpl2a , rpl14, rpl16a, rpl20, rpl22, rpl23, rpl32, rpl33, rpl36
	RNA polymerase	rpoA, rpoB, rpoC1a, rpoC2
	Translational initiation factor	infA
Genes for photosynthesis	Subunits of photosystem I	psaA, psaB, psaC, psaI, psaJ, ycf3b, ycf4
	Subunits of photosystem II	psbA, psbB, psbC, psbD, psbE, psbF, psbH, psbI, psbJ, psbK, psbL, psbM, psbN, psbT, psbZ
	Subunits of cytochrome	petA, petBa, petDa, petG, petL, petN
	Subunits of ATP synthase	atpA, atpB, atpE, atpFa, atpH, atpI
	Large subunit of Rubisco	rbcL
	Subunits of NADH dehydrogenase	ndhAa , ndhBa , ndhC, ndhD, ndhE, ndhF, ndhH, ndhI, ndhJ, ndhK
Other genes	Maturase	matK
	Envelope membrane protein	cemA
	Subunit of acetyl-CoA	accD
	Synthesis gene	ccsA
	ATP-dependent protease	clpPb
	Component of TIC complex	ycf1
Genes of unknown function	Conserved open reading frames	ycf2, ycf15
a With one intron
b With two introns

## Sheet: Table S3
Table S3. Lengths of intergenic spacer regions and introns in the plastomes of Cypripedium.
Species	C. singchii	C. tibeticum	C. japonicum	C. formosanum	C. calceolus
Intergenic spacer regions
start-psbA	175	119	127	58	104
psbA-trnK(UUU)	4298	725	351	368	351
trnK(UUU)-rps16	730	742	738	725	731
rps16-trnQ(UUG)	1250	1947	1318	1314	1387
trnQ(UUG)-psbK	406	364	382	384	363
psbK-psbI	500	465	448	448	477
psbI-trnS(GCU)	182	185	166	166	185
trnG(UCC)-trnR(UCU)	134	134	123	123	148
trnR(UCU)-atpA	1409	377	464	531	446
atpA-atpF	71	71	71	72	71
atpF-atpH	393	400	357	360	406
atpH-atpI	845	798	795	795	800
atpI-rps2	392	305	325	292	306
rps2-rpoC2	216	215	213	213	215
rpoC2-rpoC1	191	169	173	173	167
rpoC1-rpoB	26	26	26	26	26
rpoB-trnC(GCA)	1403	1672	1391	1388	1434
trnC(GCA)-petN	1066	1918	1027	1011	1033
petN-psbM	2409	3395	1299	1297	1306
psbM-trnD(GUC)	1104	853	1116	1116	857
trnD(GUC)-trnY(GUA)	396	422	403	420	396
trnY(GUA)-trnE(UUC)	59	59	59	59	76
trnE(UUC)-trnT(GGU)	1077	1657	1538	1666	1531
trnT(GGU)-psbD	1076	1547	1068	1069	1065
psbC-trnS(UGA)	146	146	154	155	146
trnS(UGA)-psbZ	232	240	224	219	233
psbZ-trnG(GCC)	269	273	260	260	279
trnG(GCC)-trnfM(CAU)	180	180	189	189	180
trnfM(CAU)-rps14	162	162	162	162	162
rps14-psaB	154	163	154	154	163
psaB-psaA	25	25	25	25	25
psaA-ycf3	1750	515	1238	1244	534
ycf3-trnS(GGA)	618	614	601	586	613
trnS(GGA)-rps4	312	313	289	290	309
rps4-trnT(UGU)	329	328	328	329	328
trnT(UGU)-trnL(UAA)	2866	1266	1091	1109	1143
trnL(UAA)-trnF(GAA)	422	460	400	400	453
trnF(GAA)-ndhJ	652	552	610	565	606
ndhJ-ndhK	114	82	156	156	82
ndhC-trnV(UAC)	2942	3530	1691	1697	1674
trnV(UAC)-trnM(CAU)	173	166	173	174	166
trnM(CAU)-atpE	212	237	206	200	236
atpB-rbcL	2683	4912	1579	1562	1615
rbcL-accD	879	916	867	867	905
accD-psaI	1206	1776	580	555	574
psaI-ycf4	400	399	398	398	399
ycf4-cemA	498	941	925	922	943
cemA-petA	238	253	250	243	253
petA-psbJ	2940	2203	980	1006	1044
psbJ-psbL	232	164	148	148	162
psbL-psbF	22	22	22	22	22
psbF-psbE	10	10	10	10	10
psbE-petL	744	1007	929	938	996
petL-petG	183	180	189	190	178
petG-trnW(CCA)	122	130	146	146	130
trnW(CCA)-trnP(UGG)	156	172	155	155	172
psaJ-rpl33	574	579	591	576	579
rpl33-rps18	260	201	205	204	197
rps18-rpl20	384	369	265	265	277
rpl20-rps12	766	793	764	764	793
rps12-clpP	2000	190	182	192	351
clpP-psbB	1496	2719	1390	1421	1398
psbB-psbT	2336	1242	839	915	833
psbT-psbN	66	65	65	65	65
psbN-psbH	110	109	110	110	109
psbH-petB	142	176	178	687	697
petB-petD	178	178	70	178	70
petD-rpoA	190	216	214	206	217
rpoA-rps11	107	101	85	85	100
rps11-rpl36	166	193	186	186	186
rpl36-infA	122	121	208	196	125
infA-rps8	113	120	113	113	113
rps8-rpl14	3186	1284	764	795	771
rpl14-rpl16	136	131	122	123	131
rpl16-rps3	165	178	171	171	170
rps3-rpl22	119	111	104	105	106
rpl22-rps19	288	300	239	242	299
rps19-trnH(GUG)	145	145	144	143	145
trnH(GUG)-rpl2	43	43	43	43	43
rpl2-rpl23	24	24	24	24	24
rpl23-trnI(CAU)	165	165	157	157	165
trnI(CAU)-ycf2	68	68	68	68	68
ycf2-trnL(CAA)	991	991	991	991	991
trnL(CAA)-ndhB	571	570	562	562	585
ndhB-rps7	315	315	315	315	315
rps7-rps12	58	58	58	58	58
rps12-trnV(GAC)	1958	2010	1964	1960	1950
trnV(GAC)-rrn16	229	229	229	229	229
rrn16-trnI(GAU)	302	302	302	302	302
trnI(GAU)-trnA(UGC)	64	64	64	64	64
trnA(UGC)-rrn23	145	145	145	145	145
rrn23-rrn4.5	98	98	98	98	98
rrn4.5-rrn5	220	220	220	220	220
rrn5-trnR(ACG)	249	281	247	247	251
trnR(ACG)-trnN(GUU)	583	579	579	579	579
trnN(GUU)-ycf1	337	337	337	337	337
ndhF-rpl32	3778	2164	2322	2271	2331
rpl32-trnL(UAG)	1122	843	702	704	883
trnL(UAG)-ccsA	3421	2539	540	571	553
ccsA-ndhD	278	251	262	265	256
ndhD-psaC	113	106	133	106	157
psaC-ndhE	1490	1142	2007	2046	2019
ndhE-ndhG	207	227	227	225	211
ndhG-ndhI	275	288	271	271	301
ndhI-ndhA	122	127	113	113	127
ndhH-rps15	160	178	177	177	177
rps15-ycf1	1175	1344	494	475	515
protein coding genes with intron
rps12	959	952	952	952	952
rps16	2069	1156	1142	1156	1176
rpl2	1486	1486	1486	1486	1486
rpl16	7481	3178	2201	2325	2195
rpoC1	2838	2833	2837	2834	2838
ycf3	2024	2011	2002	2002	2010
petB	1386	1402	1396	1398	1410
petD	1818	1483	1490	1391	1602
atpF	1637	1744	2329	2455	2338
ndhA	2981	3578	2386	2402	2462
ndhB	2242	2242	2242	2242	2242
clpP	4373	3049	2981	3183	3048
tRNA with intron
trnG-UCC	788	801	767	767	801
trnK-UUU	7730	6032	3948	4161	4056
trnL-UAA	3587	470	1381	1544	1385
trnV-UAC	663	663	671	663	663
trnA-UGC	874	874	874	874	874
trnI-GAU	1000	1010	1009	1009	1010

## Sheet: Table S4
Table S4. Species with GC content lower than 30% from GenBank database.
#Organism Name		Organism Groups	Strain	BioProject	Size(Mb)	GC%	Type	Replicons	CDS	Release Date
Pilostyles hamiltonii	parasite	Eukaryota;Plants;Land Plants		PRJNA311862	0.015167	22.6676	plastid	NC_029236.1/KT981956.1	4	2016-02-12T00:00:00Z
Hydnora visseri	parasite	Eukaryota;Plants;Land Plants		PRJNA313946	0.027233	23.4128	plastid	NC_029358.1/KT970098.1	17	2016-03-01T00:00:00Z
Pilostyles aethiopica	parasite	Eukaryota;Plants;Land Plants		PRJNA311877	0.011348	24.2333	plastid	NC_029235.1/KT981955.1	3	2016-02-12T00:00:00Z
Gastrodia elata	parasite	Eukaryota;Plants;Land Plants		PRJNA453229	0.035304	26.7703	chloroplast	NC_037409.1/MF163256.1	20	2018-04-24T00:00:00Z
Stoneobryum bunyaense	moss	Eukaryota;Plants;Land Plants		PRJNA348013	0.12304	28.1006	chloroplast	NC_042479.1/MK521875.1	82	2019-06-06T00:00:00Z
Orthotrichum rogeri	moss	Eukaryota;Plants;Land Plants		PRJNA273012	0.123363	28.361	chloroplast	NC_026212.1/KP119739.1	81	2015-01-21T00:00:00Z
Syntrichia ruralis	moss	Eukaryota;Plants;Land Plants		PRJNA33919	0.12263	28.3821	chloroplast	NC_012052.1/FJ546412.1	81	2009-02-20T00:00:00Z
Ulota bruchii	moss	Eukaryota;Plants;Land Plants		PRJNA546329	0.123536	28.3836	chloroplast	NC_042480.1/MK521876.1	82	2019-06-06T00:00:00Z
Lewinskya incana	moss	Eukaryota;Plants;Land Plants		PRJNA541695	0.123464	28.3897	chloroplast	NC_042174.1/MK521877.1	82	2019-05-12T00:00:00Z
Nyholmiella obtusifolia	moss	Eukaryota;Plants;Land Plants		PRJNA283056	0.122895	28.4495	chloroplast	NC_026979.1/KP765733.1	81	2015-05-05T00:00:00Z
Monotropa uniflora	parasite	Eukaryota;Plants;Land Plants		PRJNA400006	0.043351	28.4653	plastid	NC_035582.1/MF120265.1	22	2017-08-24T00:00:00Z
Physcomitrella patens	moss	Eukaryota;Plants;Land Plants		PRJNA453215	0.122905	28.5082	chloroplast	NC_037465.1/KY126308.1	84	2018-04-24T00:00:00Z
Physcomitrella patens	moss	Eukaryota;Plants;Land Plants		PRJNA28131	0.12289	28.5296	chloroplast	Pltd:NC_005087.1/	85	2003-09-08T00:00:00Z
Dumortiera hirsuta	liverwort	Eukaryota;Plants;Land Plants		PRJNA496162	0.12205	28.6956	chloroplast	NC_039590.1/MH355546.1	89	2018-11-06T00:00:00Z
Reboulia hemisphaerica	liverwort	Eukaryota;Plants;Land Plants		PRJNA546353	0.122596	28.7987	chloroplast	NC_042418.1/MK477551.1	87	2019-06-06T00:00:00Z
Marchantia polymorpha	liverwort	Eukaryota;Plants;Land Plants		PRJNA20411	0.121024	28.8083	chloroplast	NC_001319.1/X04465.1	89	1986-11-18T00:00:00Z
Riccia fluitans	liverwort	Eukaryota;Plants;Land Plants		PRJNA550934	0.121682	28.9509	chloroplast	NC_042887.1/MK645896.1	86	2019-06-25T00:00:00Z
Marchantia polymorpha subsp. ruderalis Kitashirakawa-2	liverwort	Eukaryota;Plants;Land Plants		PRJNA453301	0.120304	28.9691	chloroplast	NC_037507.1/LC192146.1	90	2018-04-24T00:00:00Z
Marchantia polymorpha	liverwort	Eukaryota;Plants;Land Plants		PRJNA547730	0.120314	28.9709	plastid	NC_042505.1/MH635409.1	85	2019-06-07T00:00:00Z
Fissidens nobilis	moss	Eukaryota;Plants;Land Plants		PRJNA557919	0.124962	29.2033	chloroplast	NC_044155.1/MK876184.1	82	2019-08-01T00:00:00Z
Buxbaumia aphylla	moss	Eukaryota;Plants;Land Plants		PRJNA609463	0.123907	29.2816	chloroplast	NC_046056.1/MN496310.1	84	2020-03-07T00:00:00Z
Sanionia uncinata	moss	Eukaryota;Plants;Land Plants		PRJNA267381	0.124374	29.3164	chloroplast	NC_025668.1/KM111545.1	82	2014-11-14T00:00:00Z
Tetraphis pellucida	moss	Eukaryota;Plants;Land Plants		PRJNA252478	0.127489	29.3916	chloroplast	NC_024291.1/KJ817846.1	82	2014-06-17T00:00:00Z
Pohlia nutans M211	moss	Eukaryota;Plants;Land Plants		PRJNA608367	0.125199	29.4619	chloroplast	NC_045869.1/MN937553.1	80	2020-02-24T00:00:00Z
Diphyscium foliosum	moss	Eukaryota;Plants;Land Plants		PRJNA609461	0.126558	29.8559	chloroplast	NC_046057.1/MN496311.1	83	2020-03-07T00:00:00Z
Cytinus hypocistis	parasite	Eukaryota;Plants;Land Plants		PRJNA344275	0.0194	29.8866	chloroplast	NC_031150.1/KT335971.1	15	2016-09-23T00:00:00Z

## Sheet: Table S5
Table S5. The number of palindromic repeats (≥ 20 bp) in the chloroplast genomes of Cypripedium.
Number of Repeat	20-21bp	22-23bp	24-25bp	26-27bp	28-29bp	≥30bp	Total
C. subtropicum	3209	1286	578	222	102	84	5481
C. tibeticum	1746	719	317	110	54	54	3000
C. japonicum	86	43	14	6	2	4	155
C. formosanum	171	57	35	16	5	4	288
C. calceolus	83	45	12	4	2	3	149

## Sheet: Table S6
Table S6. Non-synonymous substitution rate (dN), synonymous substitution rate (dS), and dN/dS for each gene.
Gene	Complex	dN	dS	dN/dS
atpA	ATP_synthase	0.0017	0.0307	0.05631
atpB	ATP_synthase	0.0047	0.0368	0.12683
atpE	ATP_synthase	0.0067	0.0216	0.31083
atpF	ATP_synthase	0.0142	0	999
atpH	ATP_synthase	0	0	0
atpI	ATP_synthase	0.0036	0.0183	0.19569
ndhA	Subunits of NADH dehydrogenase	0.012	0.0304	0.39473
ndhB	Subunits of NADH dehydrogenase	0.0034	0.0032	1.06444
ndhC	Subunits of NADH dehydrogenase	0.0075	0.0476	0.1573
ndhD	Subunits of NADH dehydrogenase	0.0074	0.0425	0.17491
ndhE	Subunits of NADH dehydrogenase	0.0048	0.0117	0.41274
ndhF	Subunits of NADH dehydrogenase	0.0193	0.0526	0.36766
ndhG	Subunits of NADH dehydrogenase	0.0127	0.0511	0.24796
ndhH	Subunits of NADH dehydrogenase	0.0074	0.0374	0.19863
ndhI	Subunits of NADH dehydrogenase	0.0103	0	999
ndhJ	Subunits of NADH dehydrogenase	0.0024	0	999
ndhK	Subunits of NADH dehydrogenase	0.0122	0.0162	0.75274
petA	Cytochrome	0.0054	0.0408	0.13181
petB	Cytochrome	0	0.0201	0
petD	Cytochrome	0	0.0149	0
petG	Cytochrome	0	0	0
petL	Cytochrome	0.0152	0.0418	0.36372
petN	Cytochrome	0	0	0
psaA	Photosystem_1	0.0012	0.0243	0.04915
psaB	Photosystem_1	0.0006	0.0248	0.02488
psaC	Photosystem_1	0	0.0451	0
psaI	Photosystem_1	0	0	0
psaJ	Photosystem_1	0	0.0237	0
psbA	Photosystem_2	0	0.0333	0
psbB	Photosystem_2	0.0036	0.0231	0.1577
psbC	Photosystem_2	0.002	0.0256	0.0796
psbD	Photosystem_2	0.0013	0.0081	0.15685
psbE	Photosystem_2	0.0051	0.0207	0.24612
psbF	Photosystem_2	0	0	0
psbH	Photosystem_2	0	0.0836	0
psbI	Photosystem_2	0.0144	0.0259	0.55637
psbJ	Photosystem_2	0.034	0	999
psbK	Photosystem_2	0.0122	0.1106	0.11032
psbL	Photosystem_2	0.0151	0	999
psbM	Photosystem_2	0.0145	0.0354	0.41026
psbN	Photosystem_2	0.0105	0.0334	0.31305
psbT	Photosystem_2	0.0129	0.0468	0.2753
psbZ	Photosystem_2	0.0222	0.024	0.92535
rpl14	Ribosomal_large	0	0.0255	0
rpl16	Ribosomal_large	0.0062	0.0118	0.52752
rpl20	Ribosomal_large	0.0071	0.0272	0.26321
rpl22	Ribosomal_large	0.0067	0.0196	0.34205
rpl23	Ribosomal_large	0	0	0
rpl2	Ribosomal_large	0.0017	0	999
rpl32	Ribosomal_large	0.008	0.0282	0.28194
rpl33	Ribosomal_large	0.006	0.1396	0.04333
rpl36	Ribosomal_large	0.0129	0.0295	0.43943
rpoA	RNA_polymerase	0.0012	0.0353	0.03536
rpoB	RNA_polymerase	0.0028	0.0346	0.08074
rpoC1	RNA_polymerase	0.0038	0.0207	0.1837
rpoC2	RNA_polymerase	0.0065	0.0198	0.33033
rps2	Ribosomal_small	0.0076	0.0185	0.41087
rps3	Ribosomal_small	0.0133	0.034	0.39225
rps4	Ribosomal_small	0	0.0224	0
rps7	Ribosomal_small	0	0.0095	0
rps8	Ribosomal_small	0.0032	0.0519	0.0626
rps11	Ribosomal_small	0.003	0.0132	0.22696
rps12	Ribosomal_small	0	0	0
rps14	Ribosomal_small	0	0.0001	0
rps15	Ribosomal_small	0.019	0.0712	0.26655
rps16	Ribosomal_small	0.0107	0.0712	0.14982
rps18	Ribosomal_small	0.0039	0.0245	0.16091
rps19	Ribosomal_small	0	0.0154	0
ycf1	ORF	0.0285	0.0618	0.46004
ycf2	ORF	0.003	0.0101	0.29959
ycf3	ORF	0	0.0318	0
ycf4	ORF	0.0138	0.0286	0.48334
ccsA	other	0.0125	0.0553	0.22647
cemA	other	0.0151	0.0346	0.43813
clpP	other	0.0023	0.0197	0.11451
infA	other	0.0058	0.0375	0.15455
rbcL	other	0.0064	0.0521	0.12258
accD	other	0.0178	0.0435	0.41042
matK	Maturase	0.0175	0.0605	0.28945
mean		0.00692152	0.0286747

## Sheet: Table S7
Table S7. Numbers of indels in intergenic spacer regions and introns in the plastomes of Cypripedium.
Species	No. of Indels
Intergenic spacer regions
start-psbA	1
psbA-trnK(UUU)	4
trnK(UUU)-rps16	10
rps16-trnQ(UUG)	18
trnQ(UUG)-psbK	3
psbK-psbI	4
psbI-trnS(GCU)	1
trnG(UCC)-trnR(UCU)	4
trnR(UCU)-atpA	7
atpA-atpF	0
atpF-atpH	4
atpH-atpI	4
atpI-rps2	2
rps2-rpoC2	1
rpoC2-rpoC1	0
rpoC1-rpoB	0
rpoB-trnC(GCA)	15
trnC(GCA)-petN	5
petN-psbM	15
psbM-trnD(GUC)	8
trnD(GUC)-trnY(GUA)	3
trnY(GUA)-trnE(UUC)	0
trnE(UUC)-trnT(GGU)	32
trnT(GGU)-psbD	5
psbC-trnS(UGA)	2
trnS(UGA)-psbZ	2
psbZ-trnG(GCC)	2
trnG(GCC)-trnfM(CAU)	0
trnfM(CAU)-rps14	0
rps14-psaB	0
psaB-psaA	0
psaA-ycf3	0
ycf3-trnS(GGA)	2
trnS(GGA)-rps4	2
rps4-trnT(UGU)	1
trnT(UGU)-trnL(UAA)	15
trnL(UAA)-trnF(GAA)	4
trnF(GAA)-ndhJ	8
ndhJ-ndhK	1
ndhC-trnV(UAC)	19
trnV(UAC)-trnM(CAU)	2
trnM(CAU)-atpE	5
atpB-rbcL	16
rbcL-accD	5
accD-psaI	7
psaI-ycf4	2
ycf4-cemA	11
cemA-petA	1
petA-psbJ	12
psbJ-psbL	0
psbL-psbF	0
psbF-psbE	0
psbE-petL	9
petL-petG	2
petG-trnW(CCA)	1
trnW(CCA)-trnP(UGG)	1
psaJ-rpl33	5
rpl33-rps18	1
rps18-rpl20	1
rpl20-rps12	0
rps12-clpP	2
clpP-psbB	16
psbB-psbT	7
psbT-psbN	0
psbN-psbH	1
psbH-petB	4
petB-petD	0
petD-rpoA	1
rpoA-rps11	1
rps11-rpl36	4
rpl36-infA	1
infA-rps8	0
rps8-rpl14	11
rpl14-rpl16	2
rpl16-rps3	1
rps3-rpl22	3
rpl22-rps19	1
rps19-trnH(GUG)	2
trnH(GUG)-rpl2	0
rpl2-rpl23	1
rpl23-trnI(CAU)	0
trnI(CAU)-ycf2	0
ycf2-trnL(CAA)	0
trnL(CAA)-ndhB	1
ndhB-rps7	0
rps7-rps12	0
rps12-trnV(GAC)	8
trnV(GAC)-rrn16	0
rrn16-trnI(GAU)	0
trnI(GAU)-trnA(UGC)	0
trnA(UGC)-rrn23	0
rrn23-rrn4.5	0
rrn4.5-rrn5	0
rrn5-trnR(ACG)	1
trnR(ACG)-trnN(GUU)	1
trnN(GUU)-ycf1	0
ndhF-rpl32	36
rpl32-trnL(UAG)	14
trnL(UAG)-ccsA	8
ccsA-ndhD	1
ndhD-psaC	0
psaC-ndhE	33
ndhE-ndhG	2
ndhG-ndhI	5
ndhI-ndhA	0
ndhH-rps15	0
rps15-ycf1	2
protein coding genes with intron
rps12	0
rps16	5
rpl2	0
rpl16	15
rpoC1	2
ycf3	2
petB	4
petD	3
atpF	22
ndhA	5
ndhB	0
clpP	37
tRNA with intron
trnG-UCC	3
trnK-UUU	22
trnL-UAA	11
trnV-UAC	0
trnA-UGC	0
trnI-GAU	1
